# Supplementary material for: Total synthesis of bicyclomahanimbine by Cu(ii)-promoted photoredox process
Source: Royal Society of Chemistry journal article supplement (doi:10.1039/d4ra05863a), 2024-01-01
Supplement: d4ra05863a1.pdf [file d4ra05863a1.pdf]

Supplemental material for:

## **Total Synthesis of Bicyclomahanimbine by Cu(II)-Promoted Photoredox Process**

Shilpa Dangar, Tiyasa Roy, Suman Noskar, and Alakesh Bisai\*

Department of Chemical Sciences, Indian Institute of Science Education and Research Kolkata, Mohanpur Campus, Kalyani,  
Nadia – 741 246, West Bengal, INDIA

### **Table of Contents**

<sup>1</sup>H-NMR, <sup>13</sup>C-NMR and Spectral Traces

S02 – S44

## Spectral Data

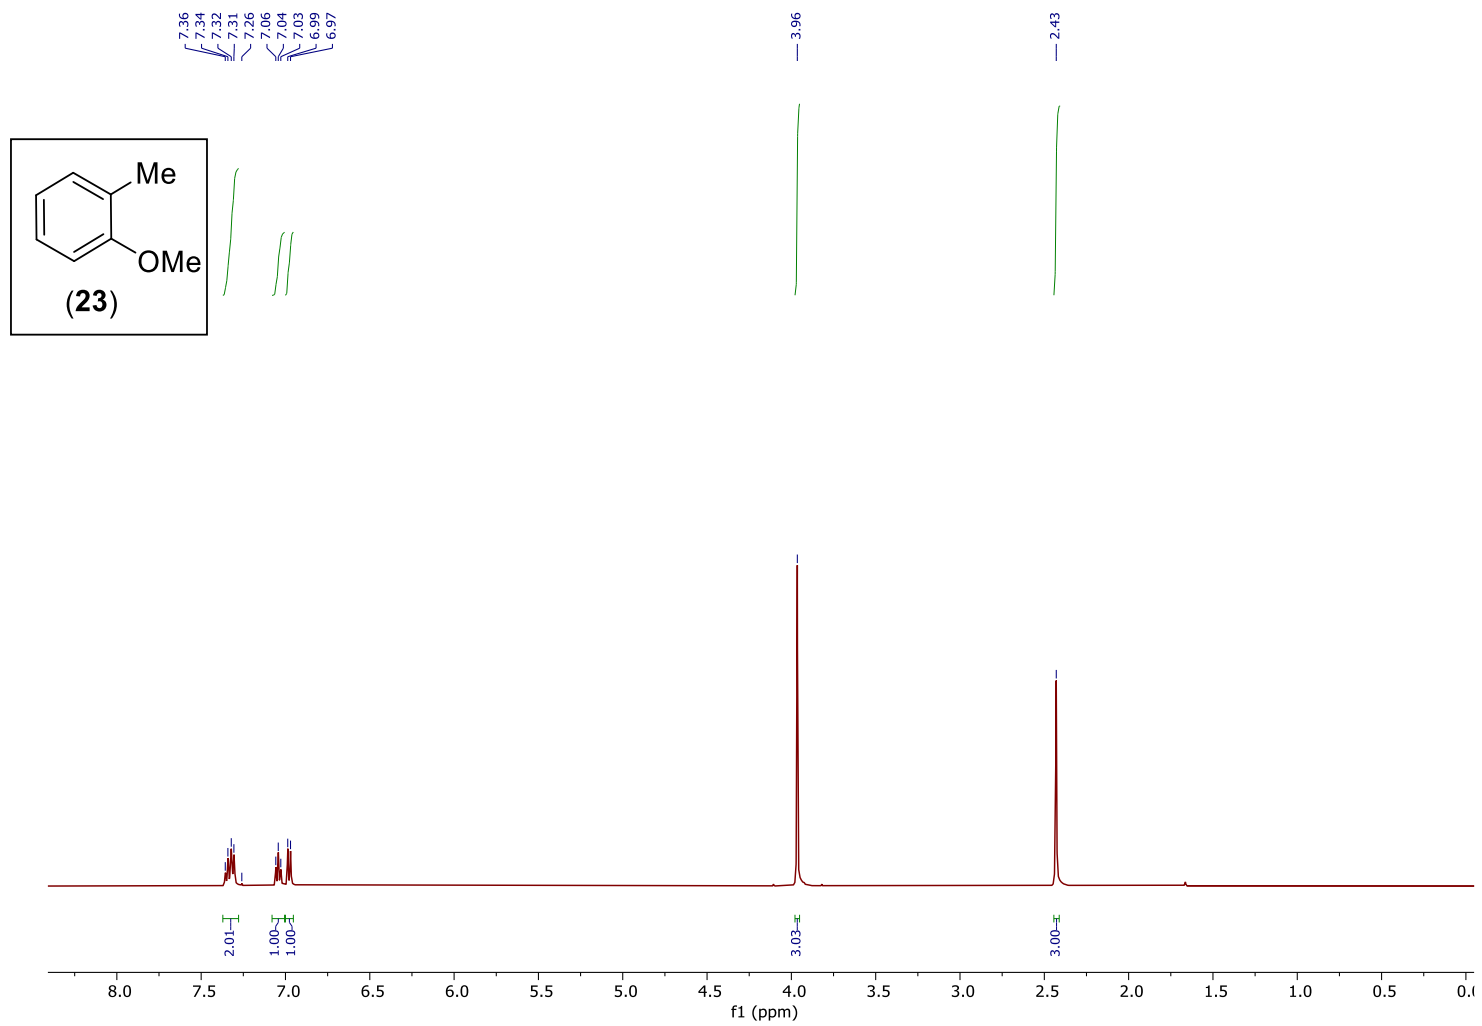

$^1\text{H}$  NMR (500 MHz,  $\text{CDCl}_3$ ) of **23**

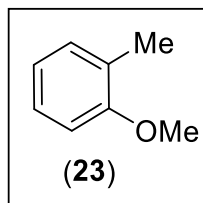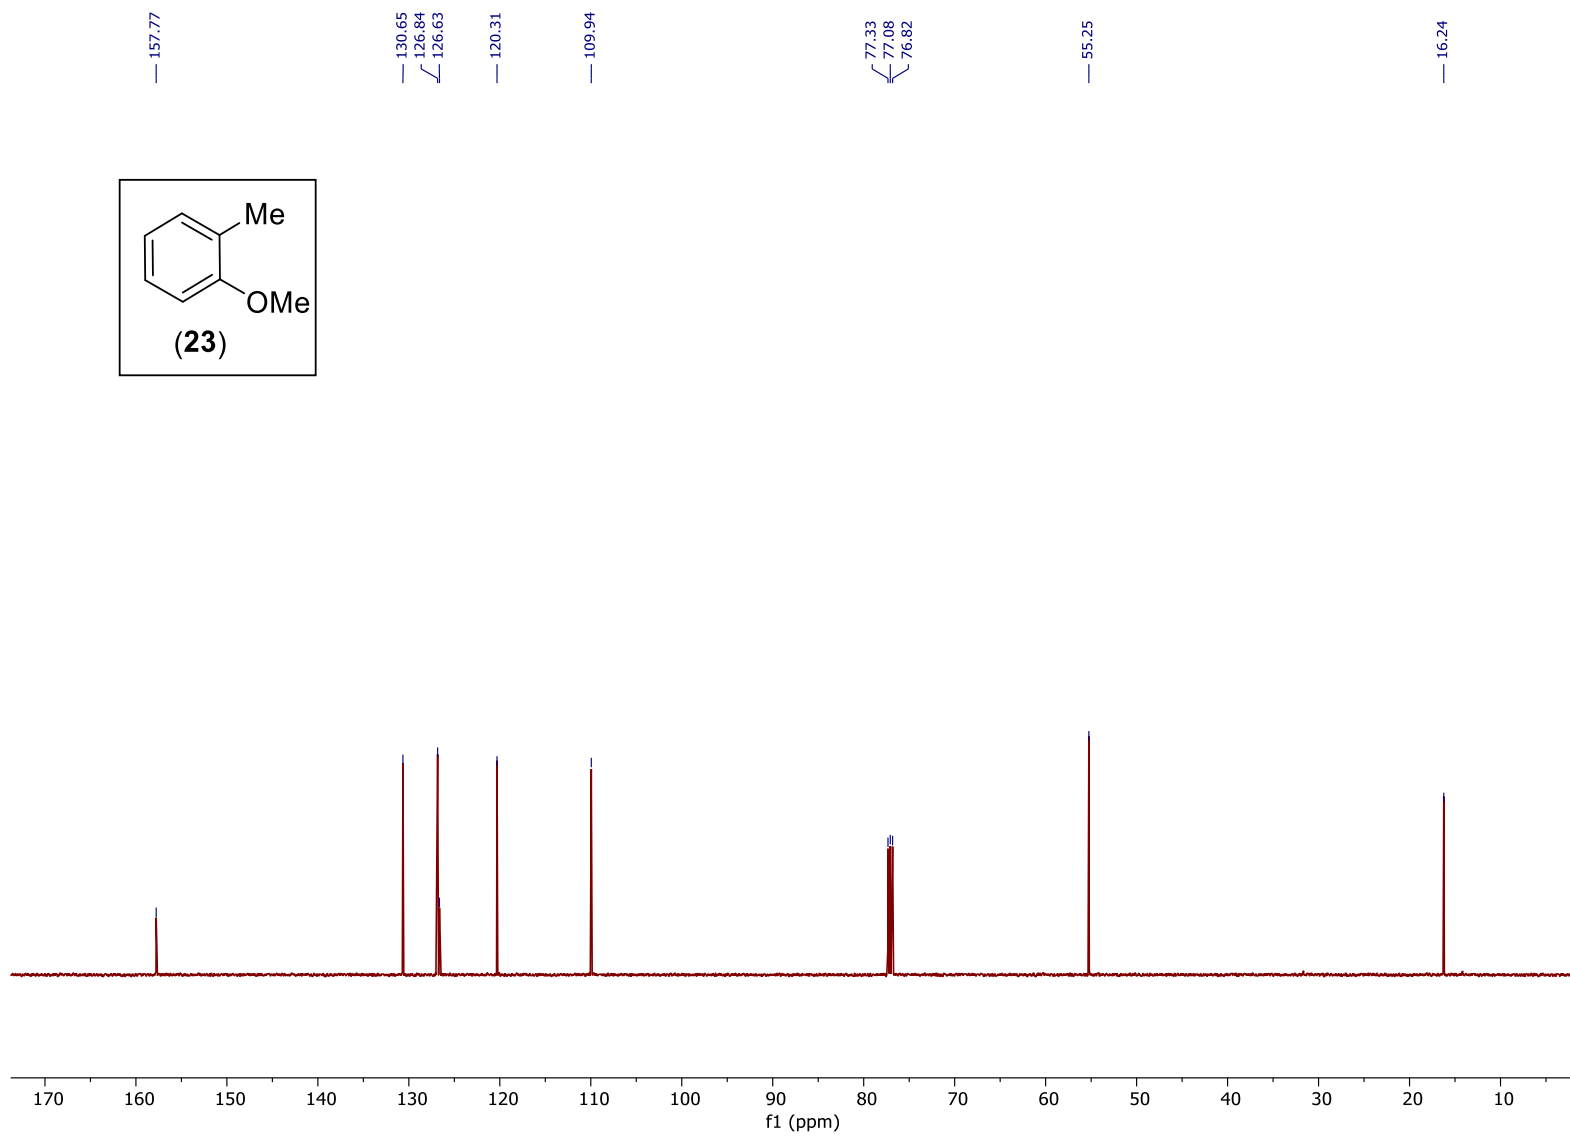

$^{13}\text{C}$  NMR (500 MHz,  $\text{CDCl}_3$ ) of **23**

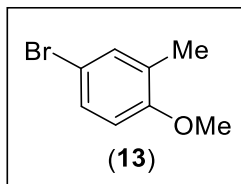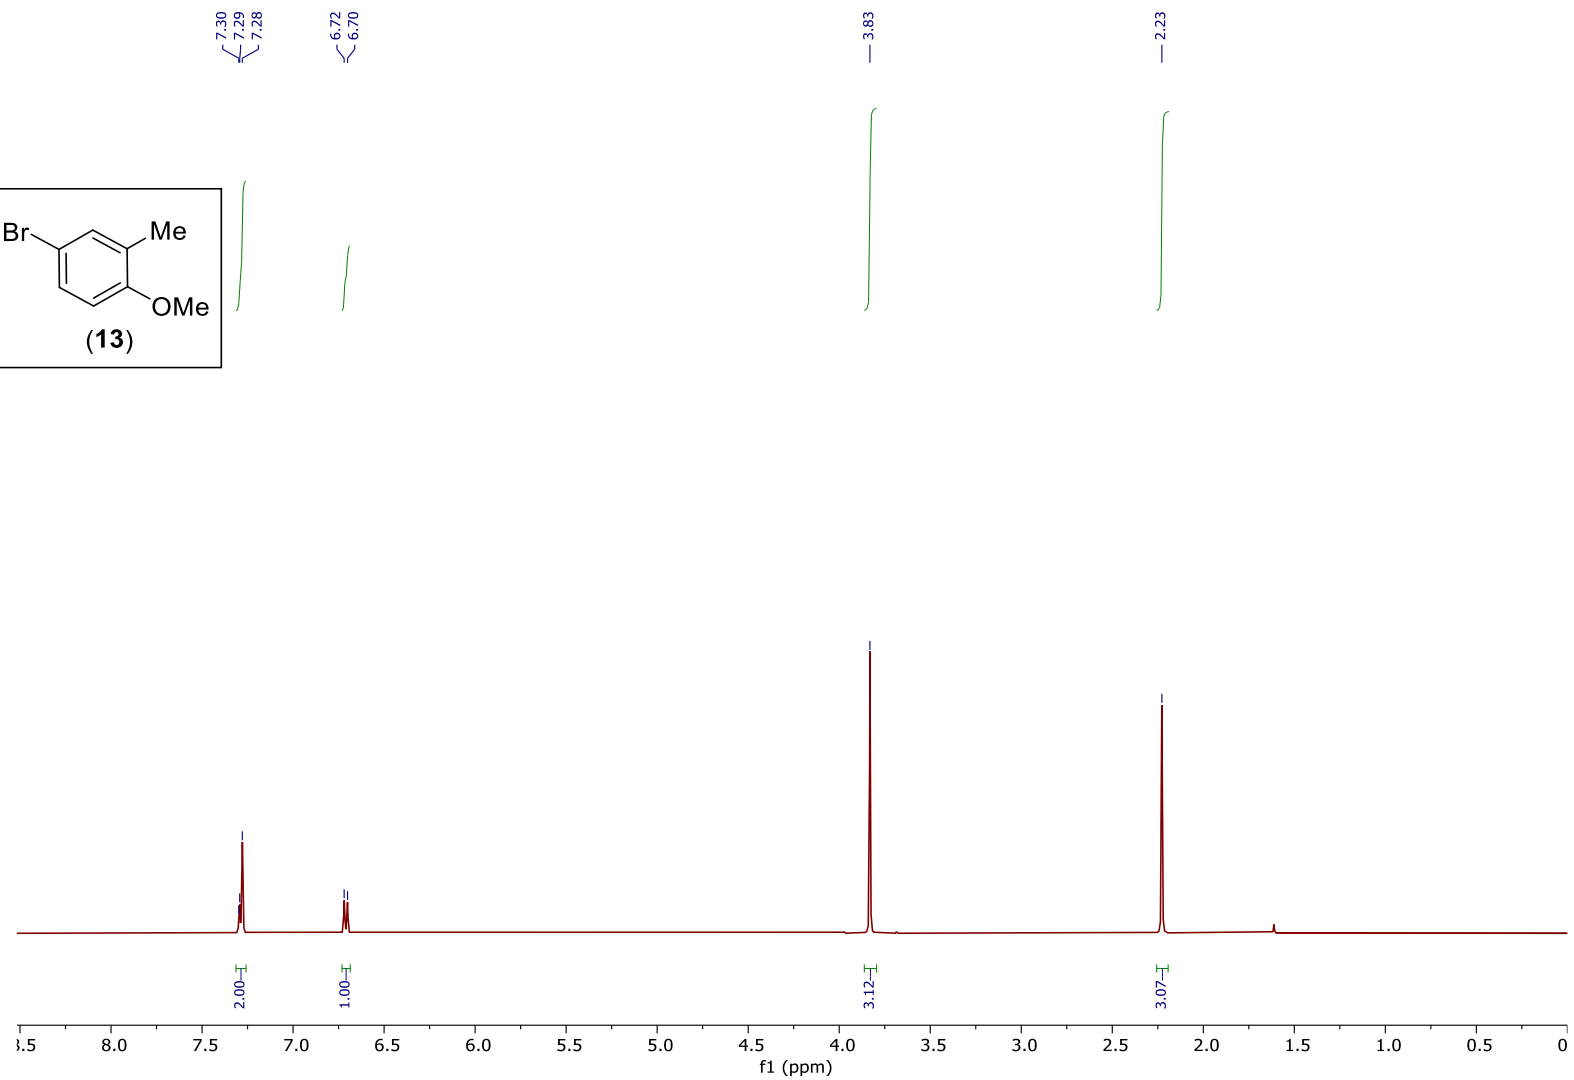

$^1\text{H}$  NMR (500 MHz,  $\text{CDCl}_3$ ) of **13**

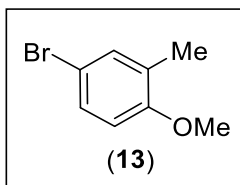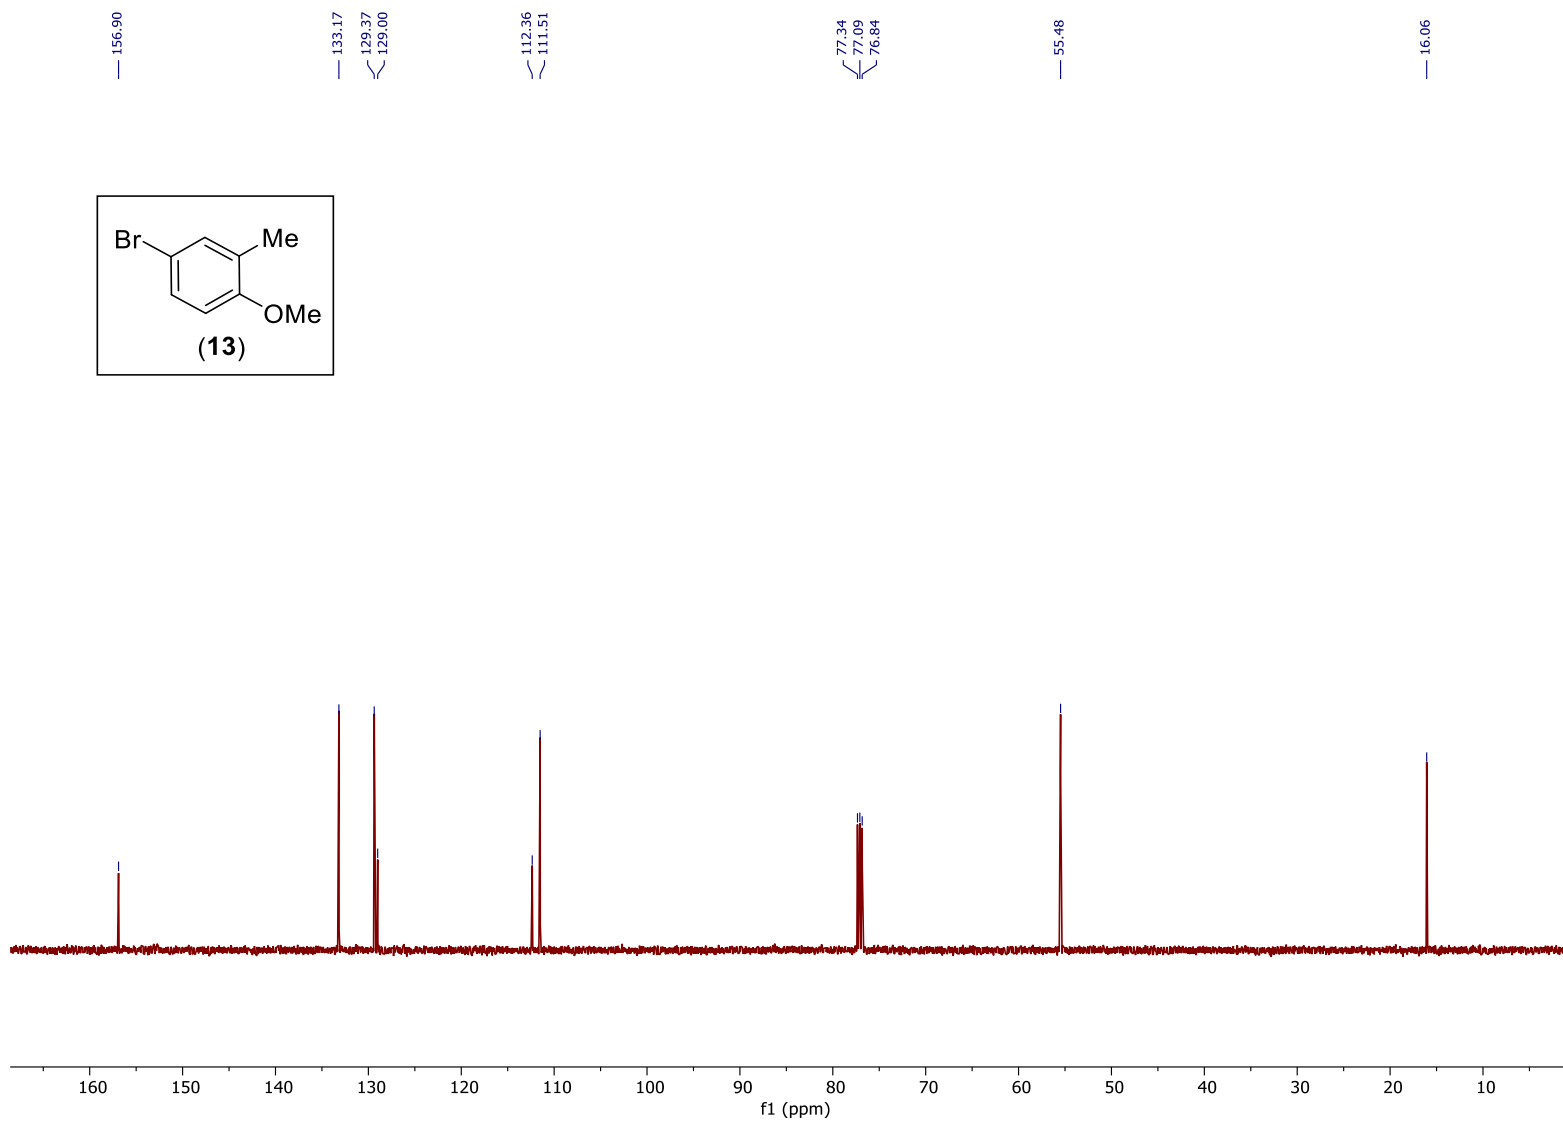

$^{13}\text{C}$  NMR (125 MHz,  $\text{CDCl}_3$ ) of **13**

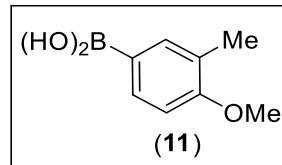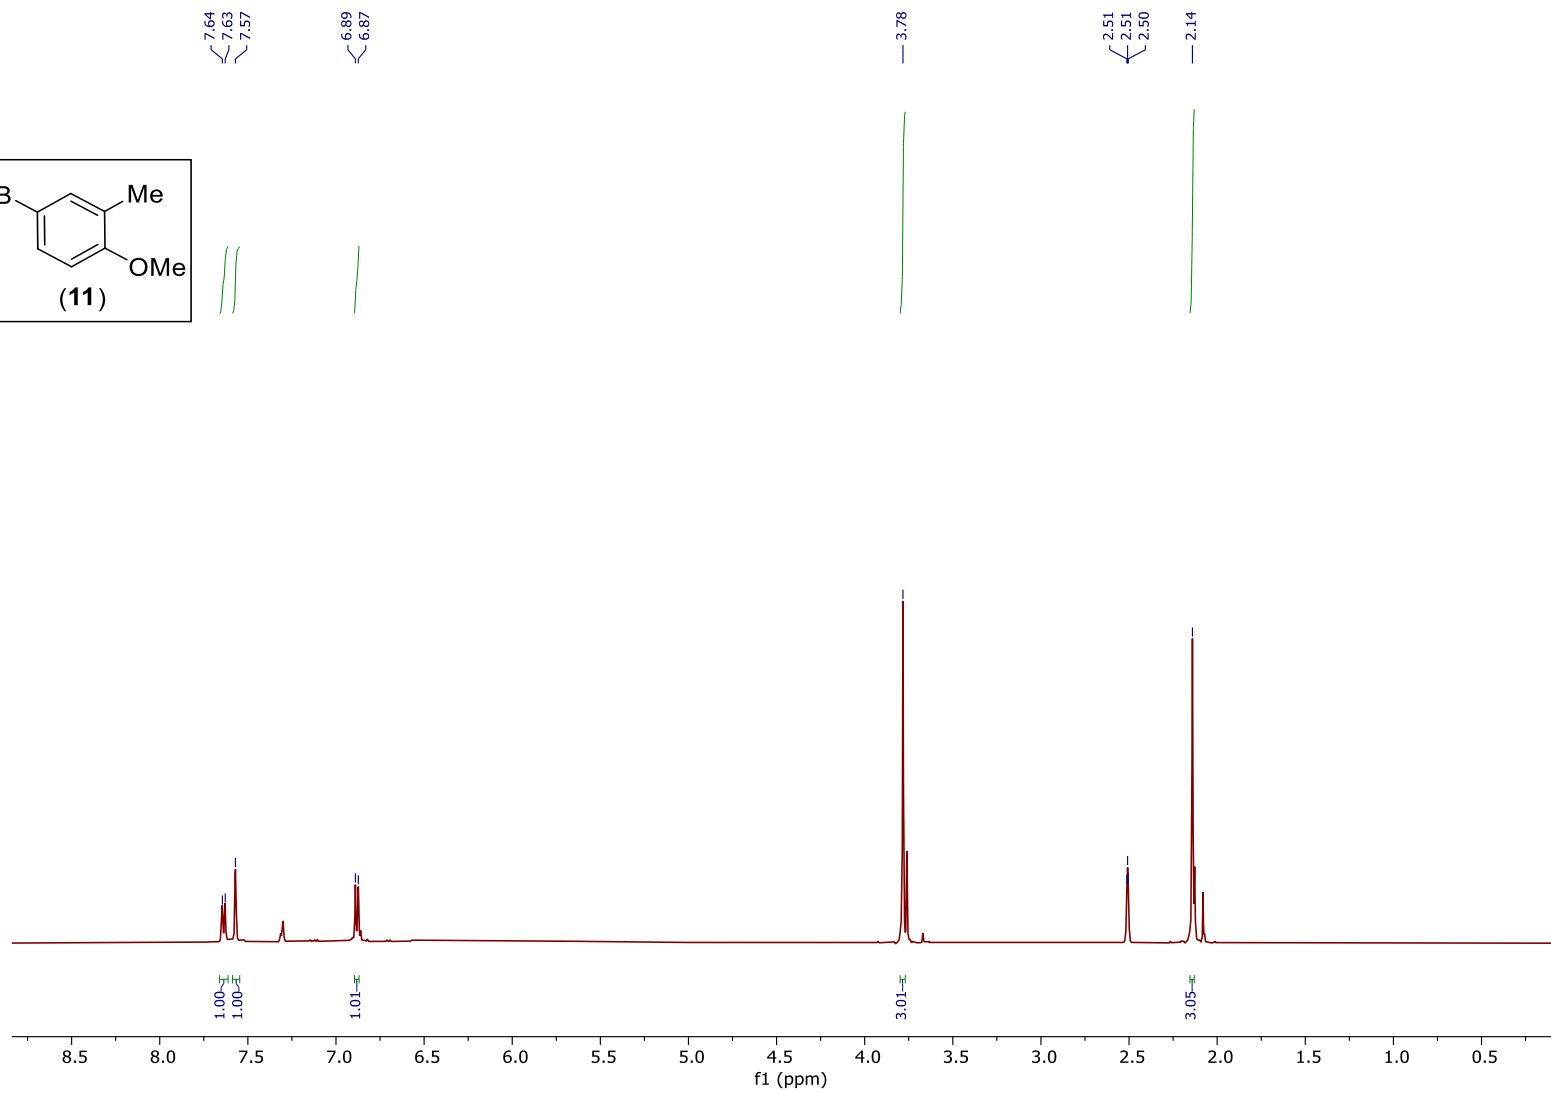

$^1\text{H}$  NMR (500 MHz,  $\text{CDCl}_3$ ) of **11**

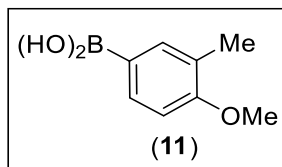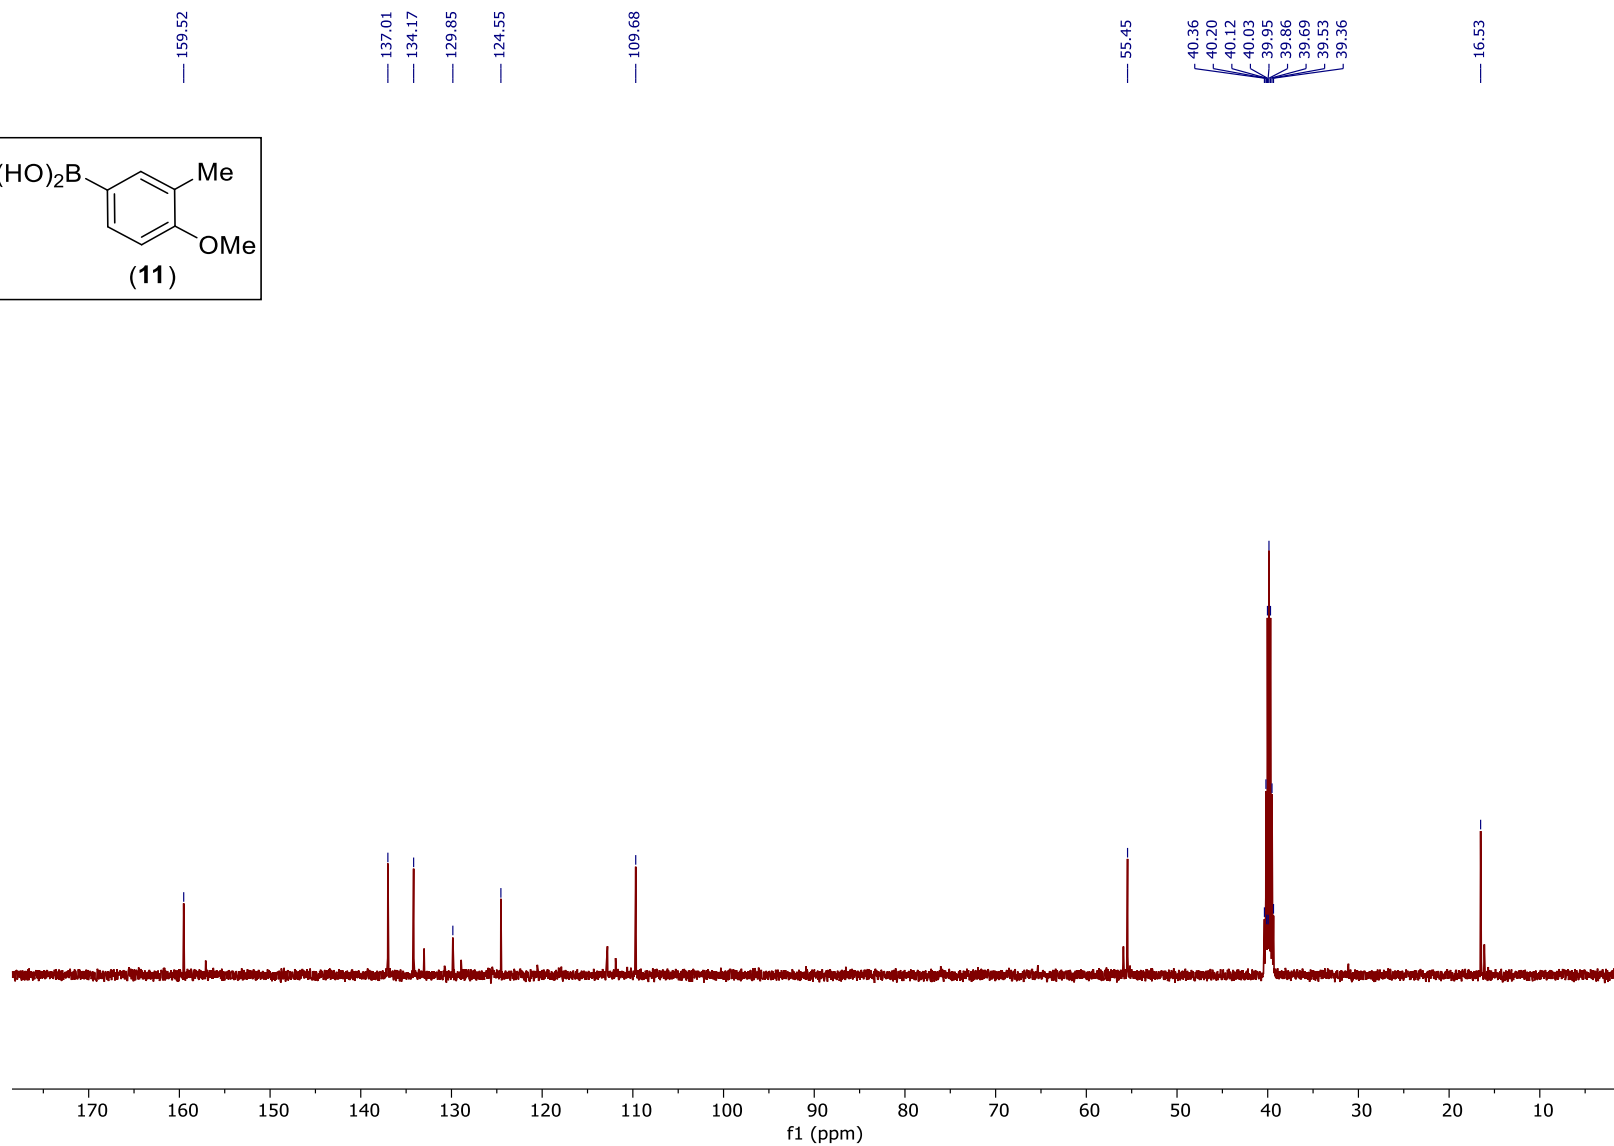

$^{13}\text{C}$  NMR (126 MHz,  $\text{CDCl}_3$ ) of **11**

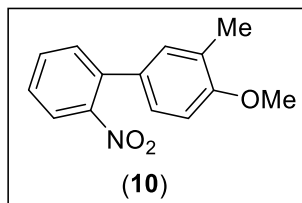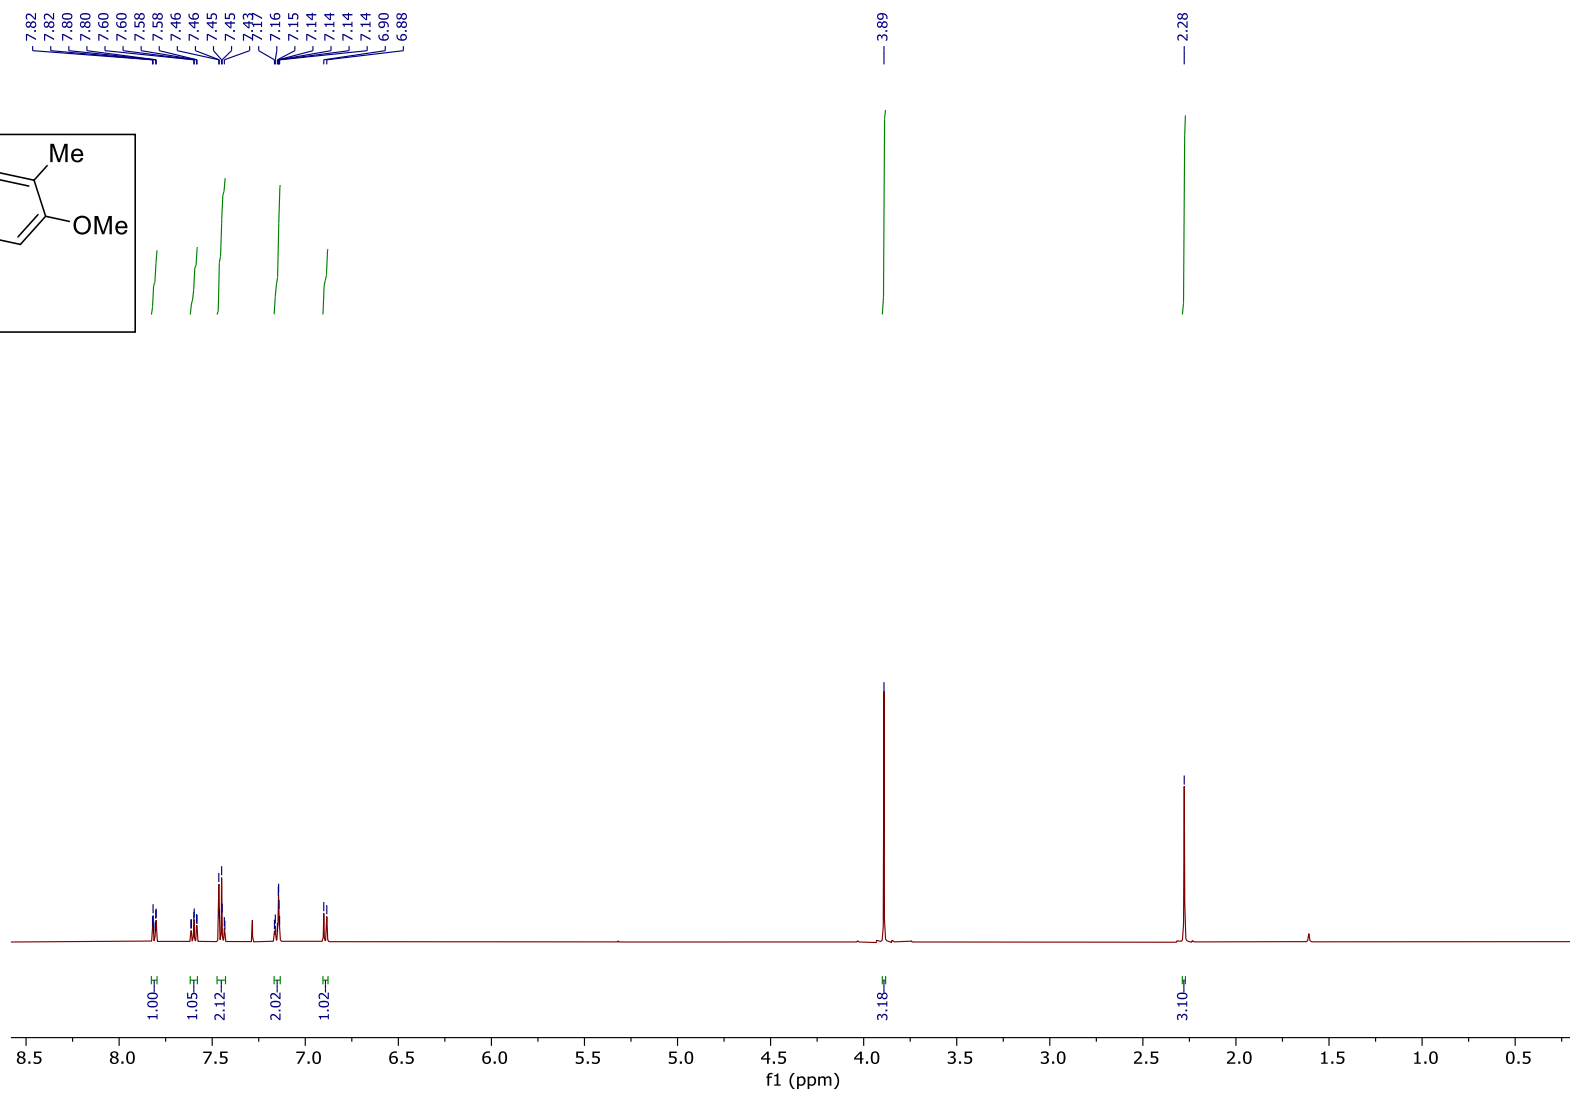

<sup>1</sup>H NMR (500 MHz, CDCl<sub>3</sub>) of **10**



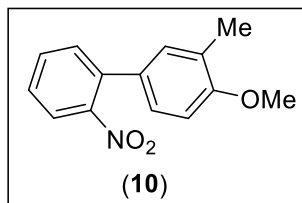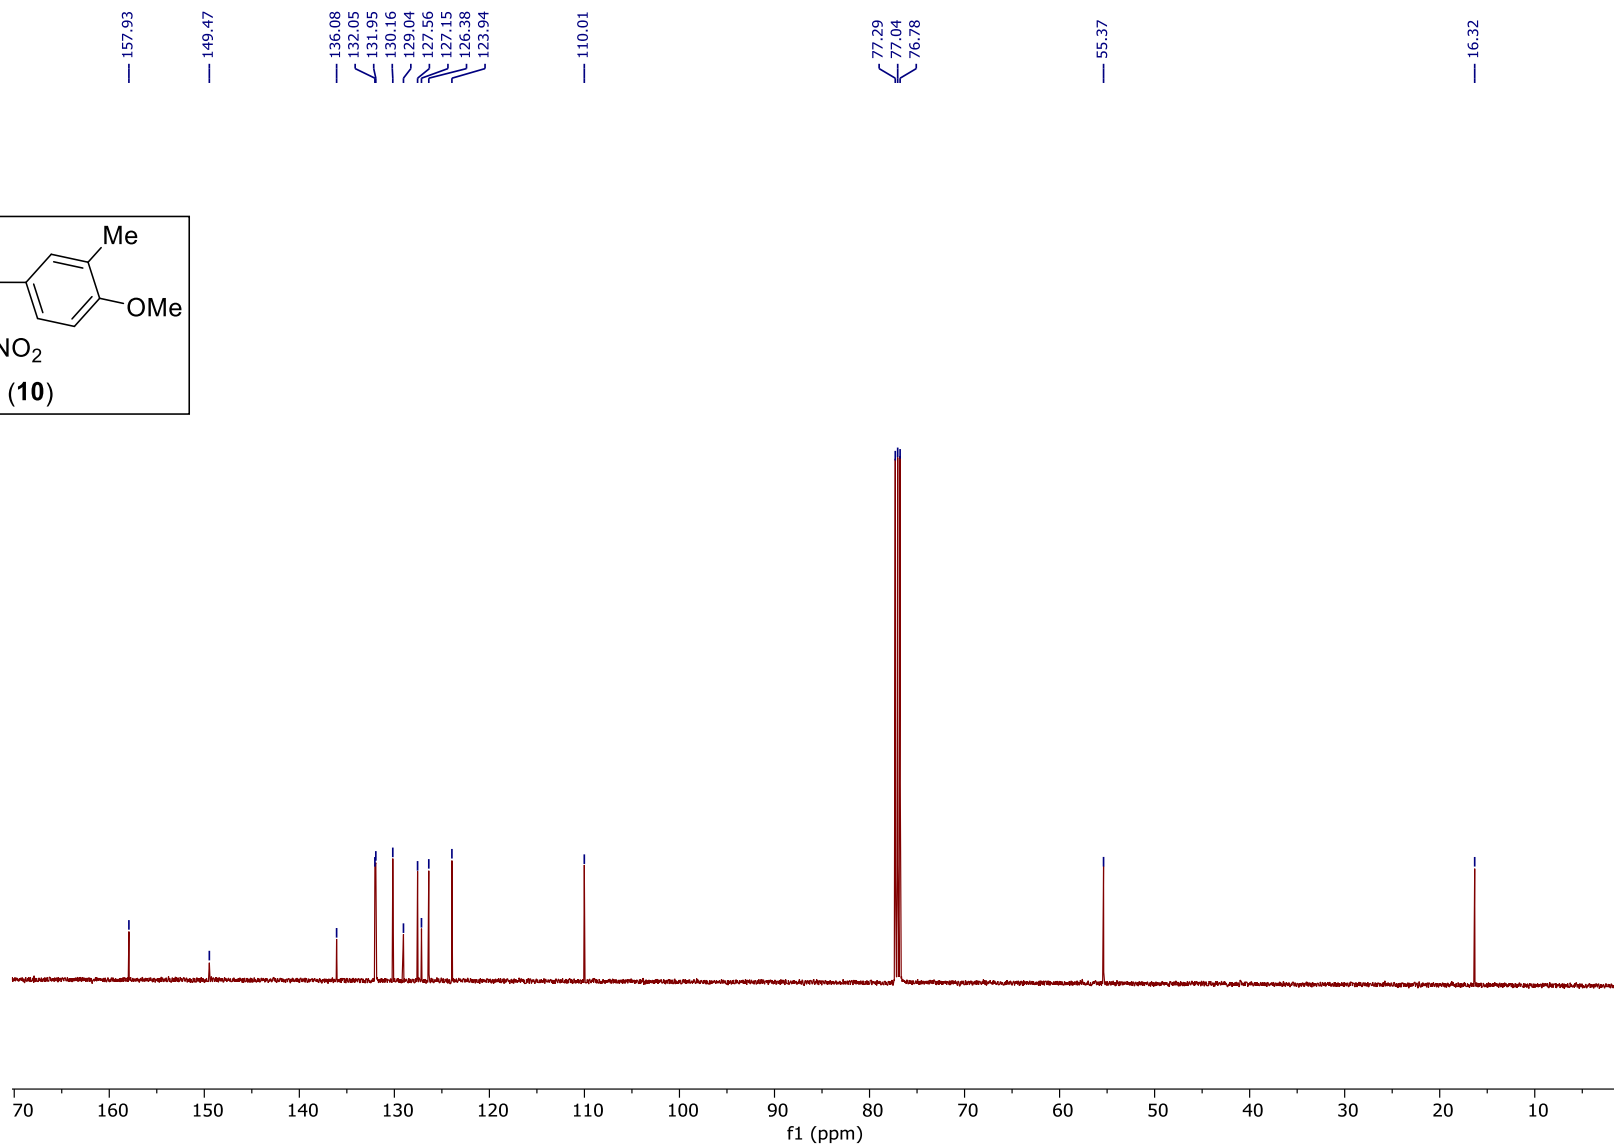

$^{13}\text{C}$  NMR (126 MHz,  $\text{CDCl}_3$ ) of **10**

AB06-May-2024 11:50:18  
AB-SUM-33SUZM (0.104) Is (1.00,1.00) C<sub>14</sub>H<sub>14</sub>NO<sub>3</sub>

IISER - KOLKATA

1: TOF MS ES+  
8.49e12

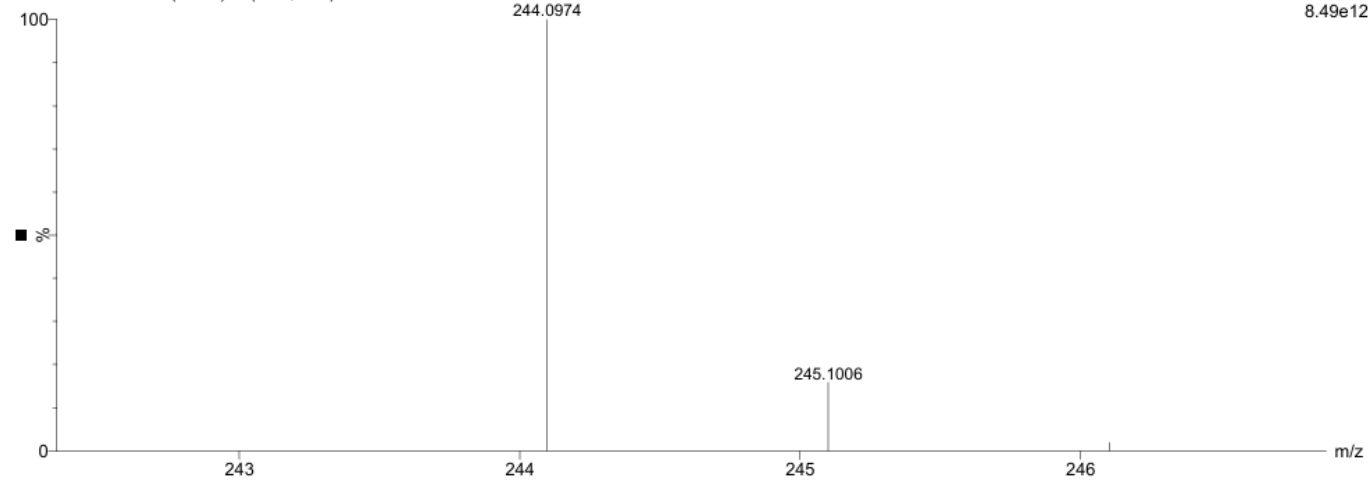

AB-SUM-33SUZM 4 (0.104) AM (Cen,1, 80.00, Ar,10000.0,0.00,0.00)

1: TOF MS ES+  
9.11e4

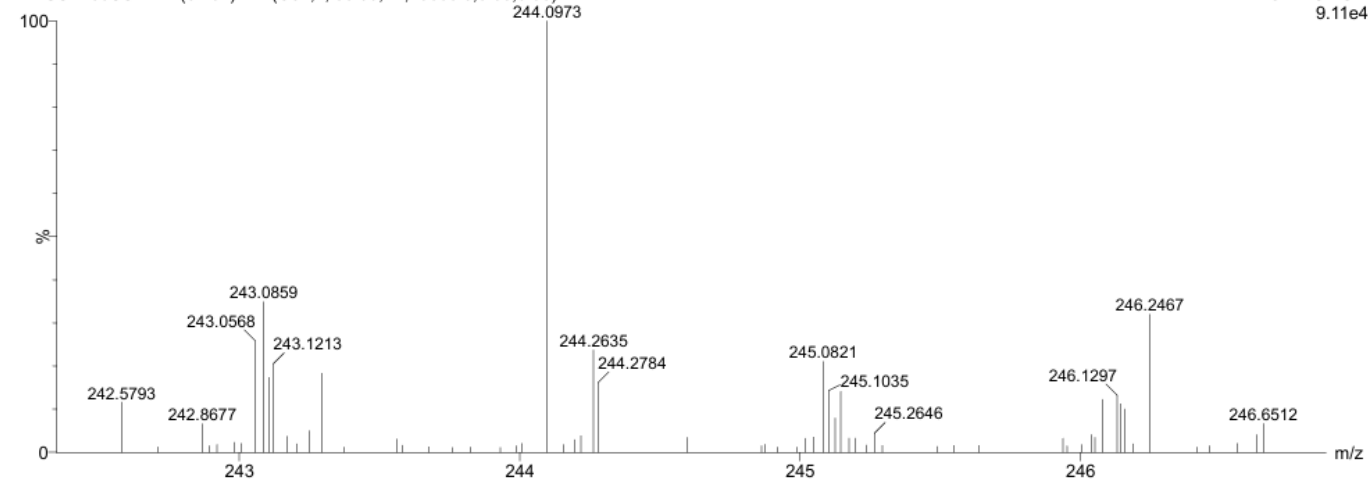

HRMS data of 10

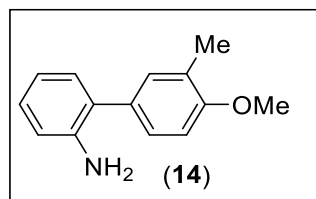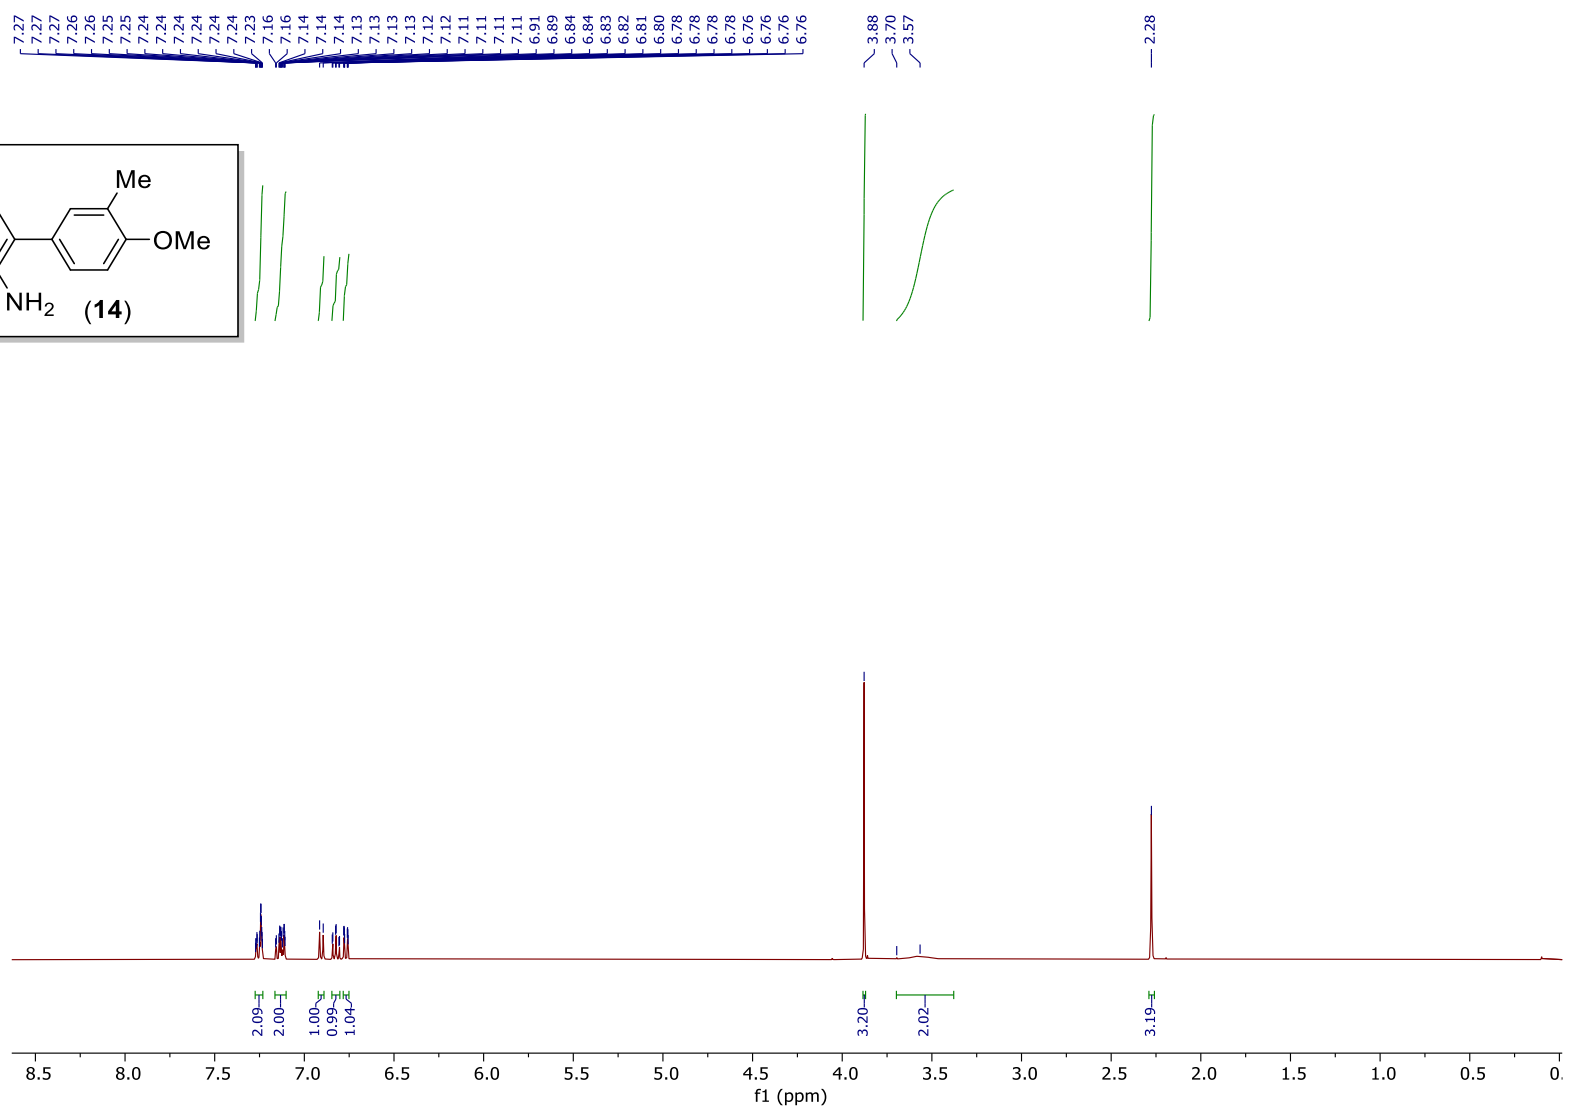

<sup>1</sup>H NMR (400 MHz, CDCl<sub>3</sub>) of **14**

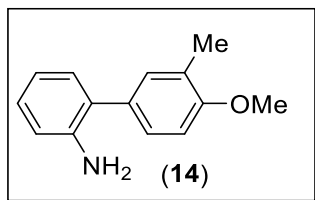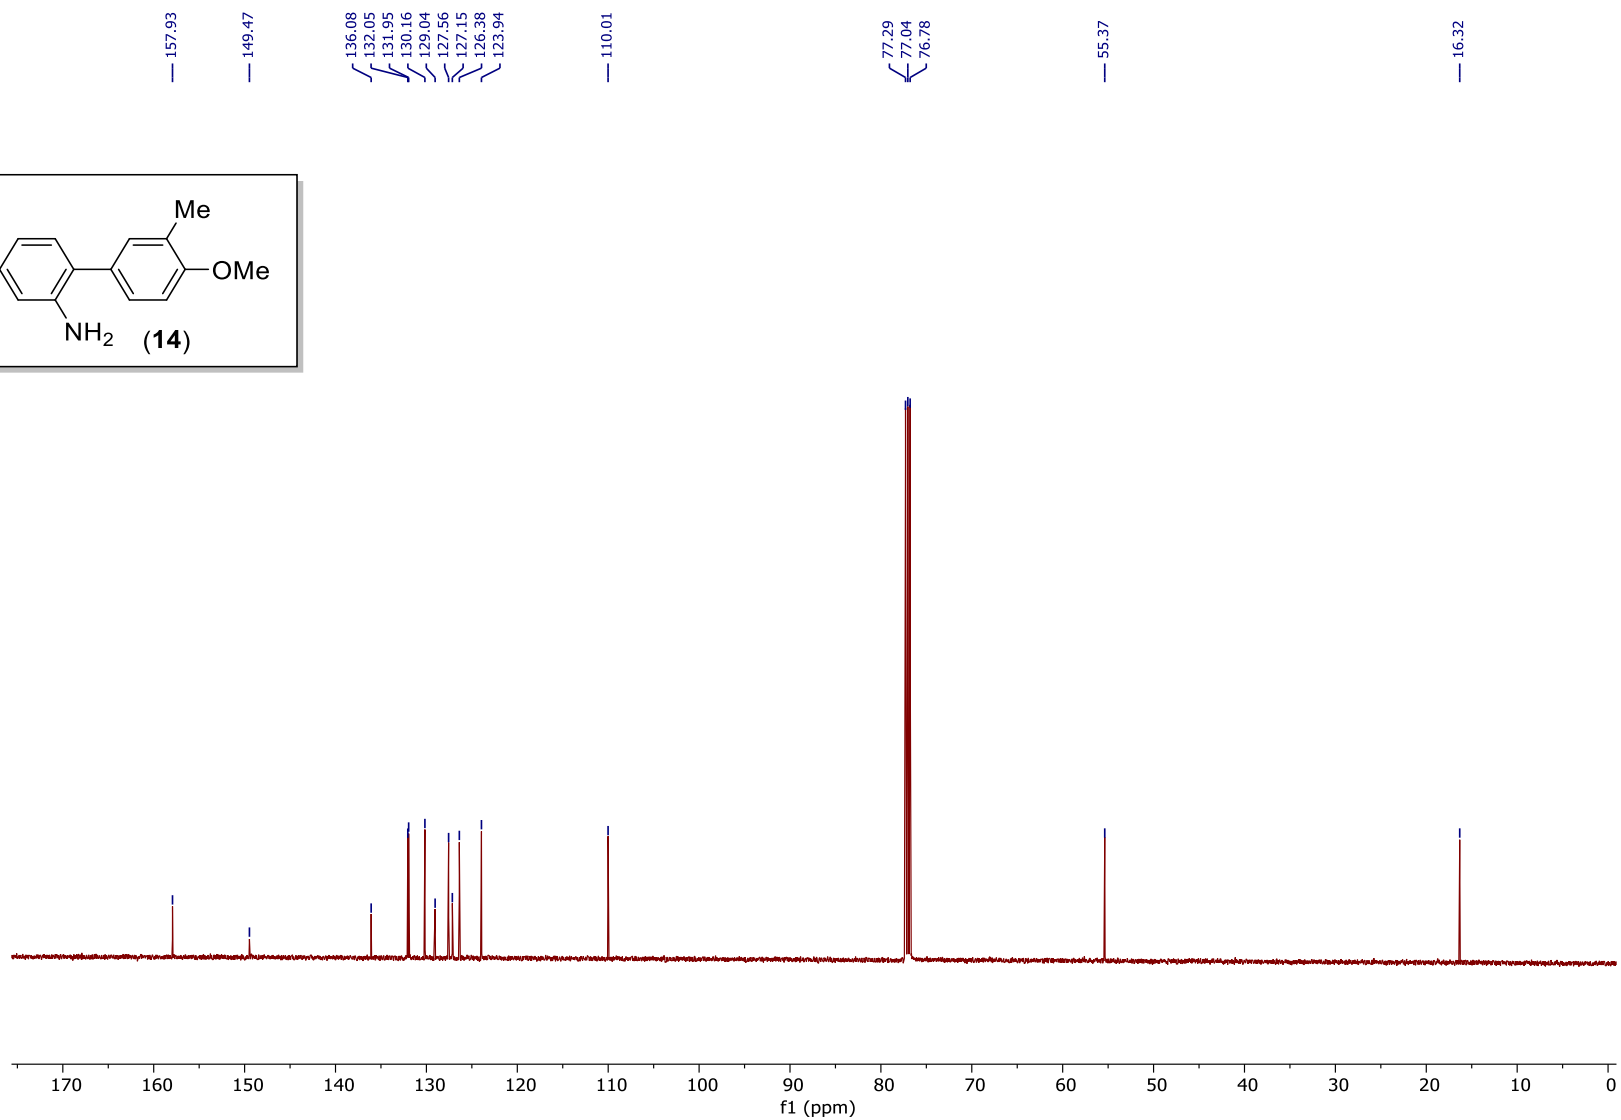

$^{13}\text{C}$  NMR (126 MHz,  $\text{CDCl}_3$ ) of **14**

SK30-Apr-2024 16:40:17  
SK-SSK-SD31NH2M (0.172) Is (1.00,1.00) C14H16NO

IISER - KOLKATA

1: TOF MS ES+  
8.53e12

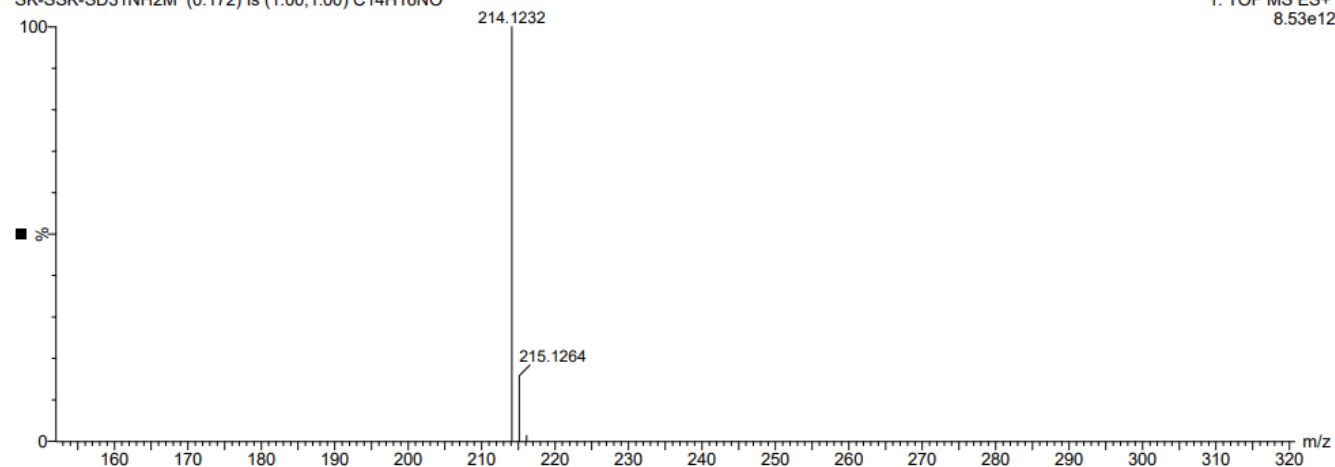

SK-SSK-SD31NH2M 8 (0.172)

1: TOF MS ES+  
7.21e6

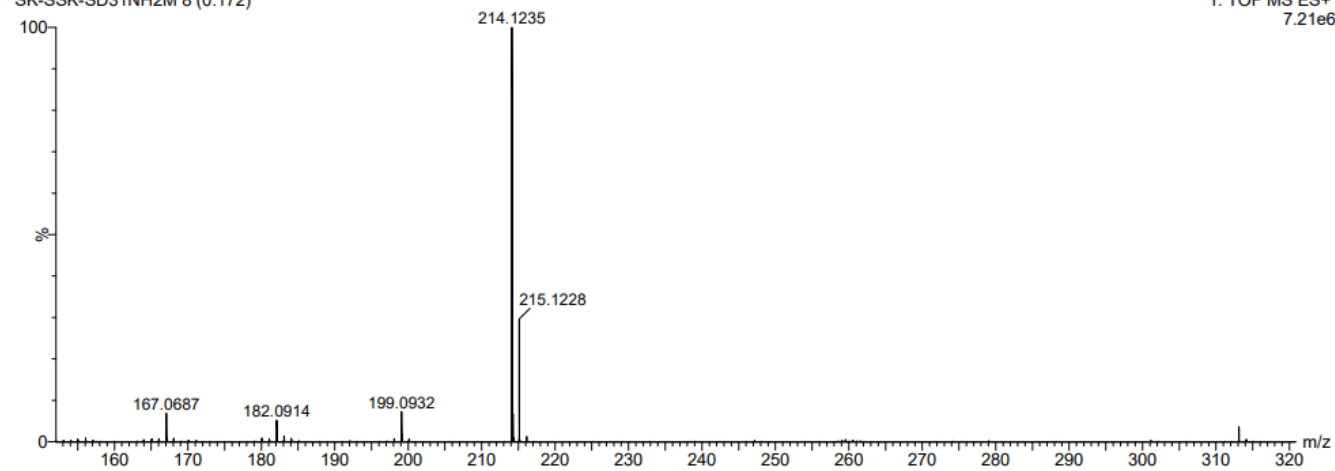

HRMS data of 14

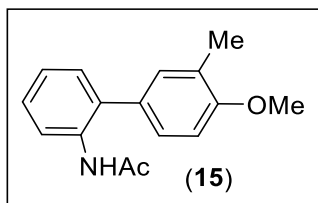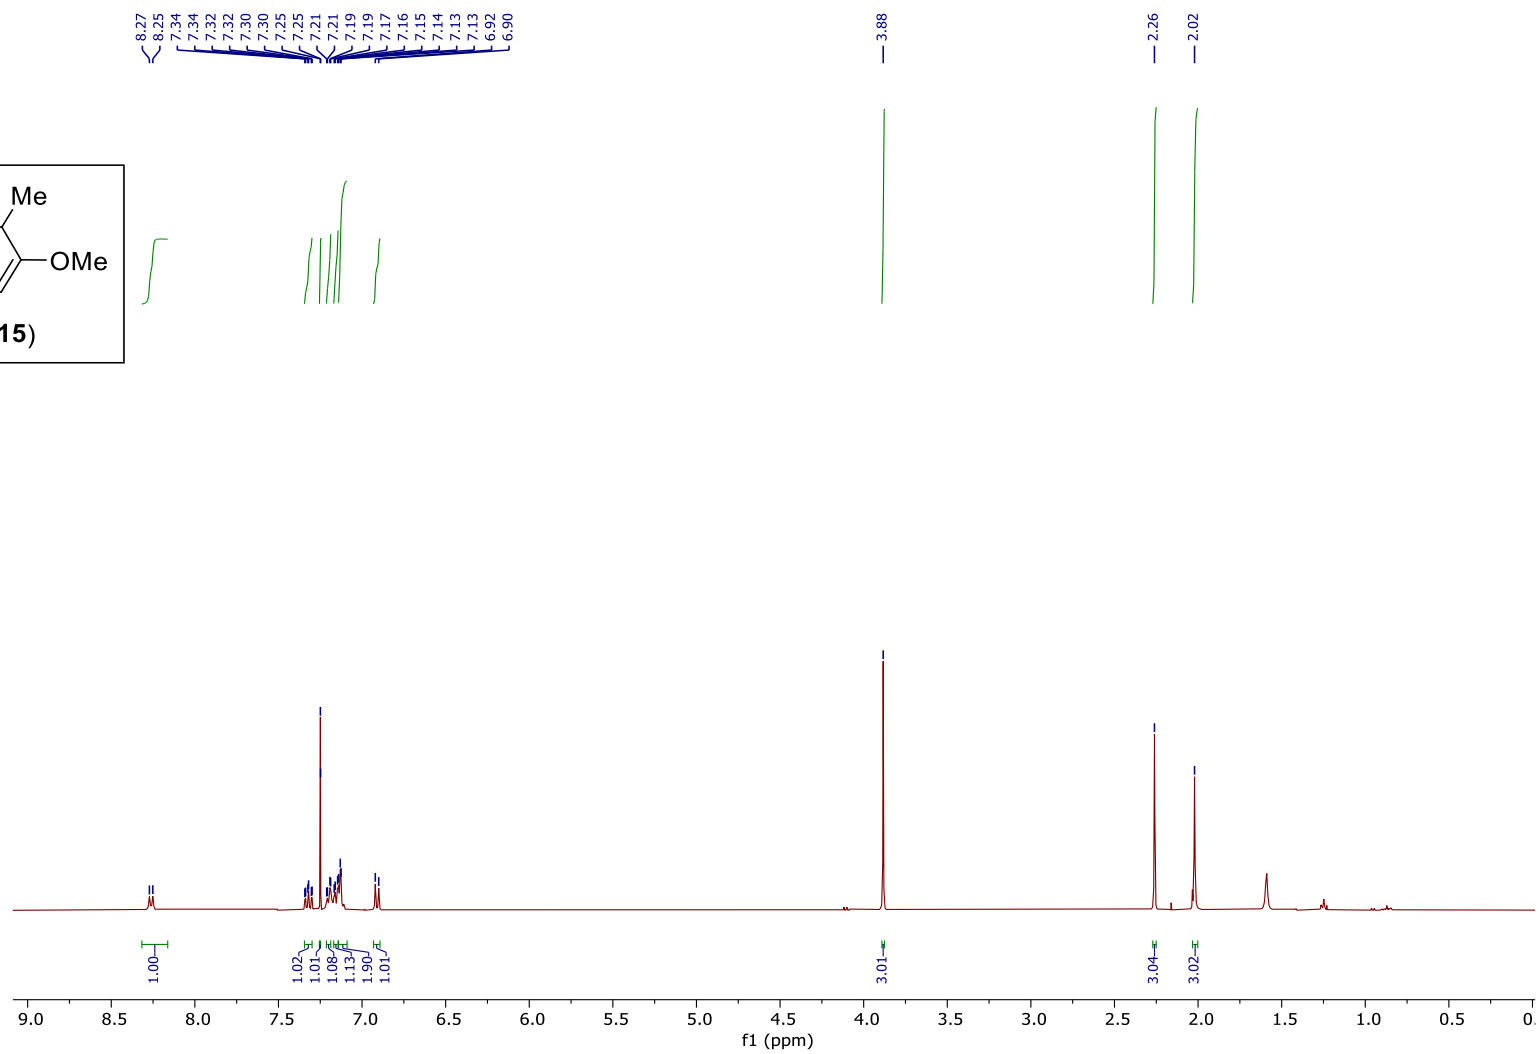

$^1\text{H}$  NMR (400 MHz,  $\text{CDCl}_3$ ) of 15

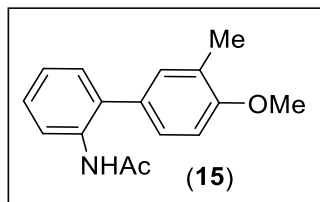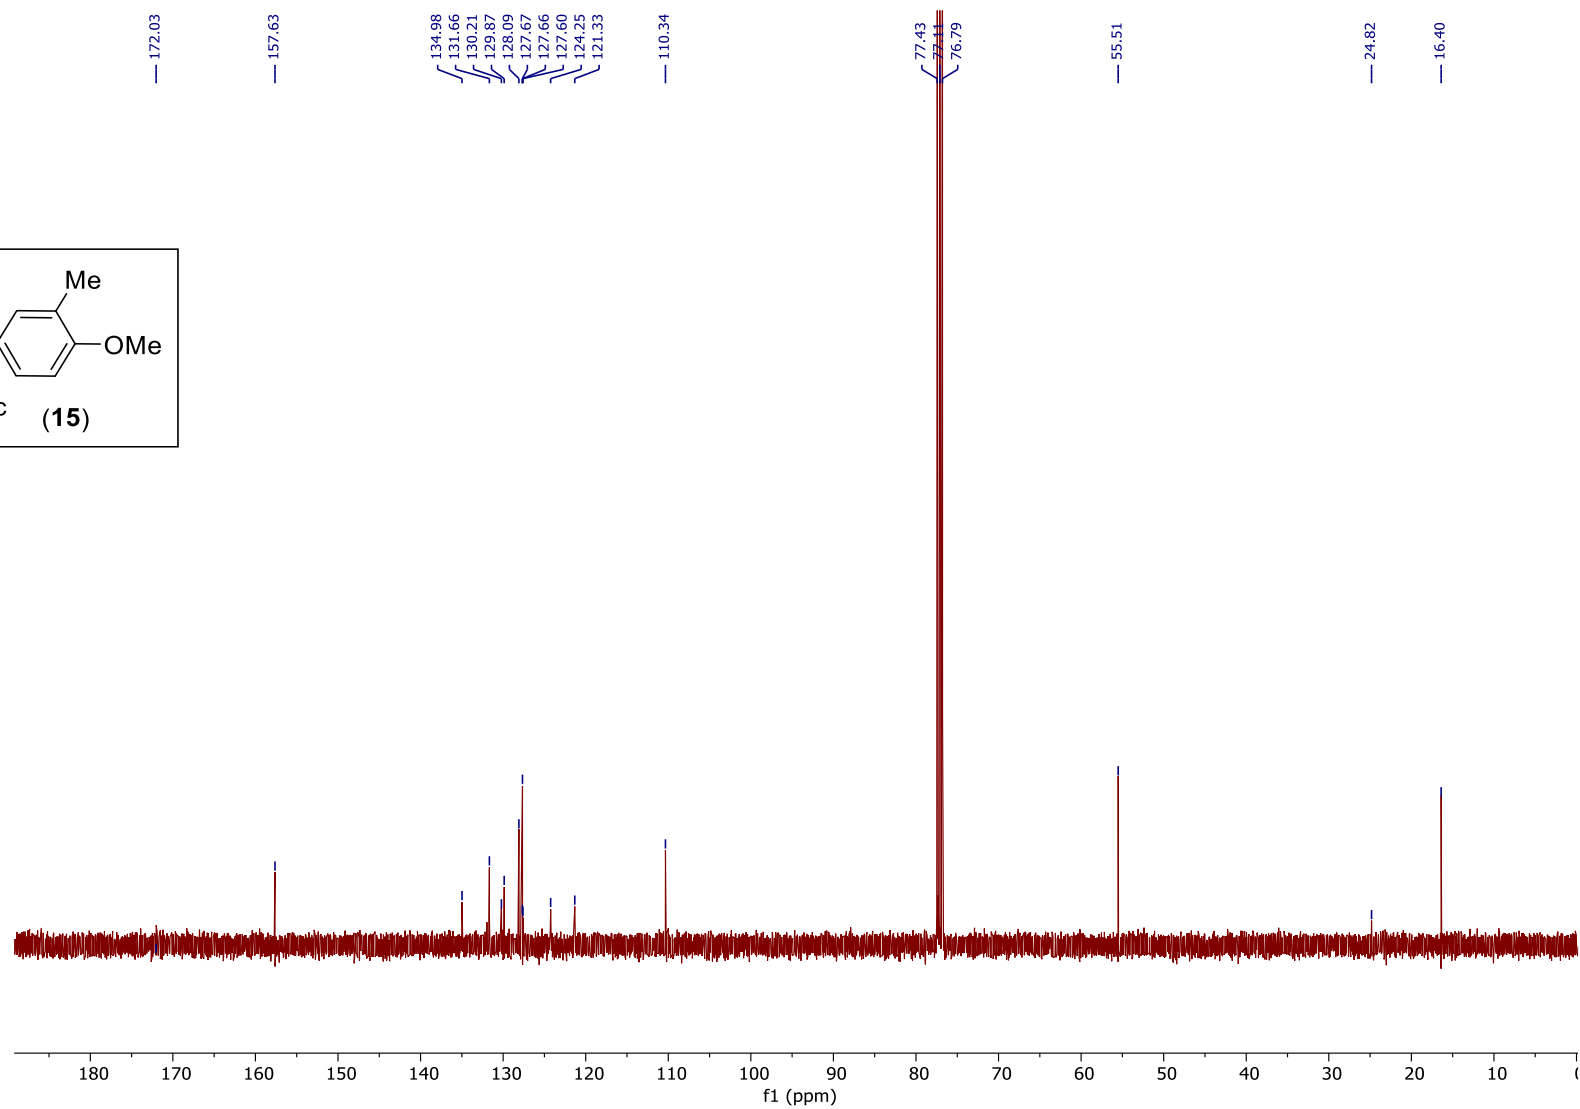

$^{13}\text{C}$  NMR (100 MHz,  $\text{CDCl}_3$ ) of **15**

AB02-May-2024 11:48:57

IISER - KOLKATA

1: TOF MS ES+  
8.33e12

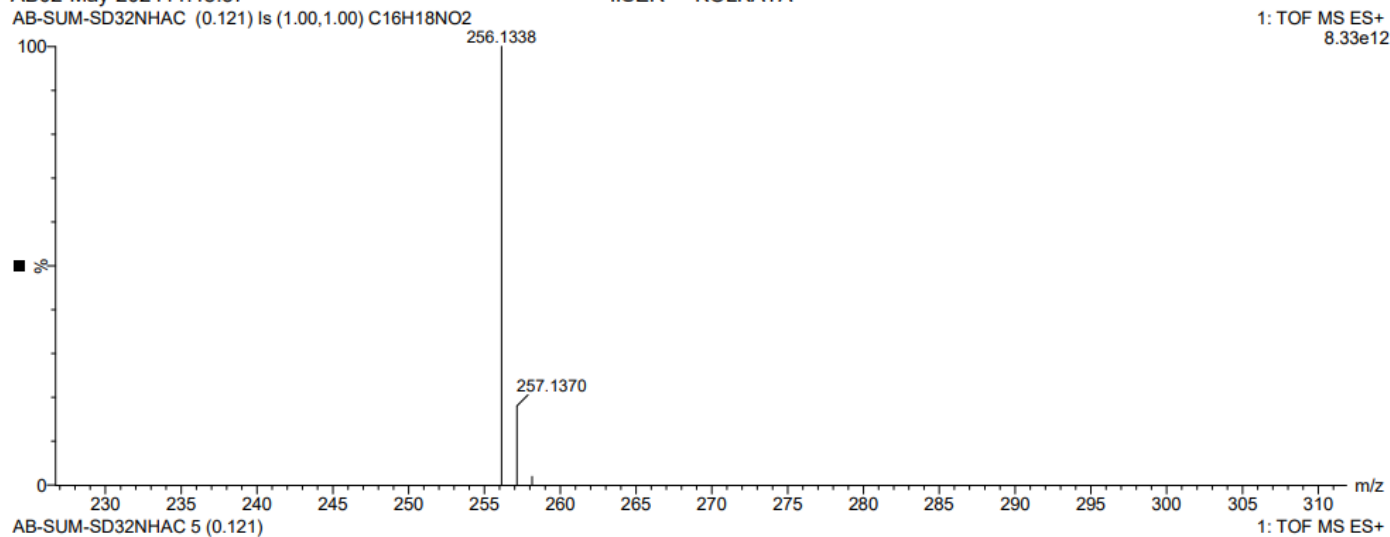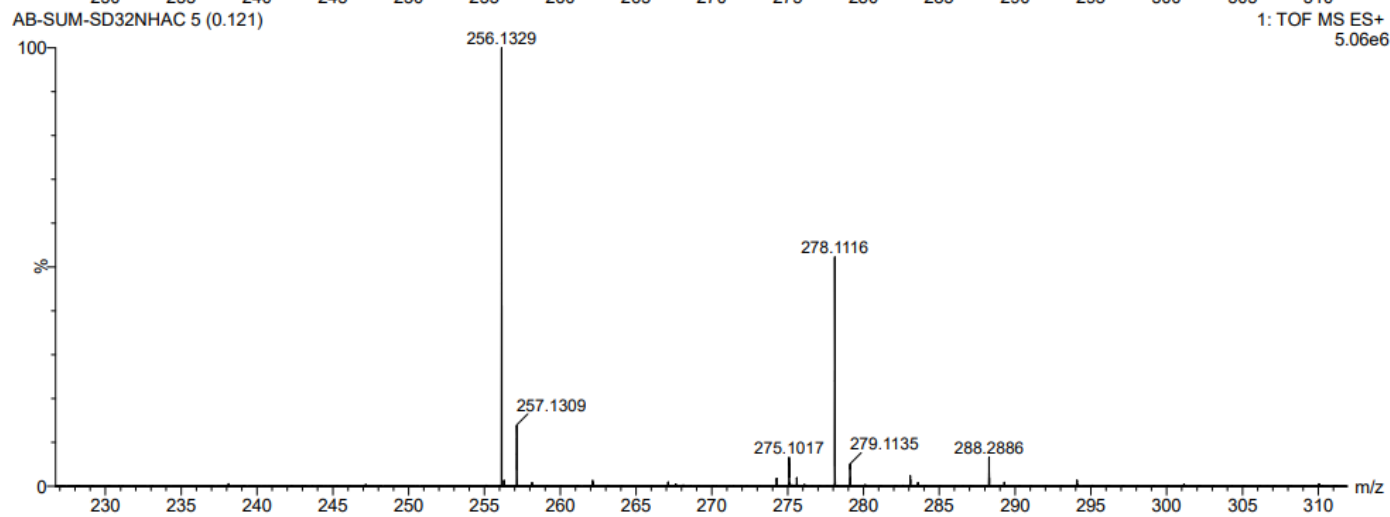

HRMS data of 15



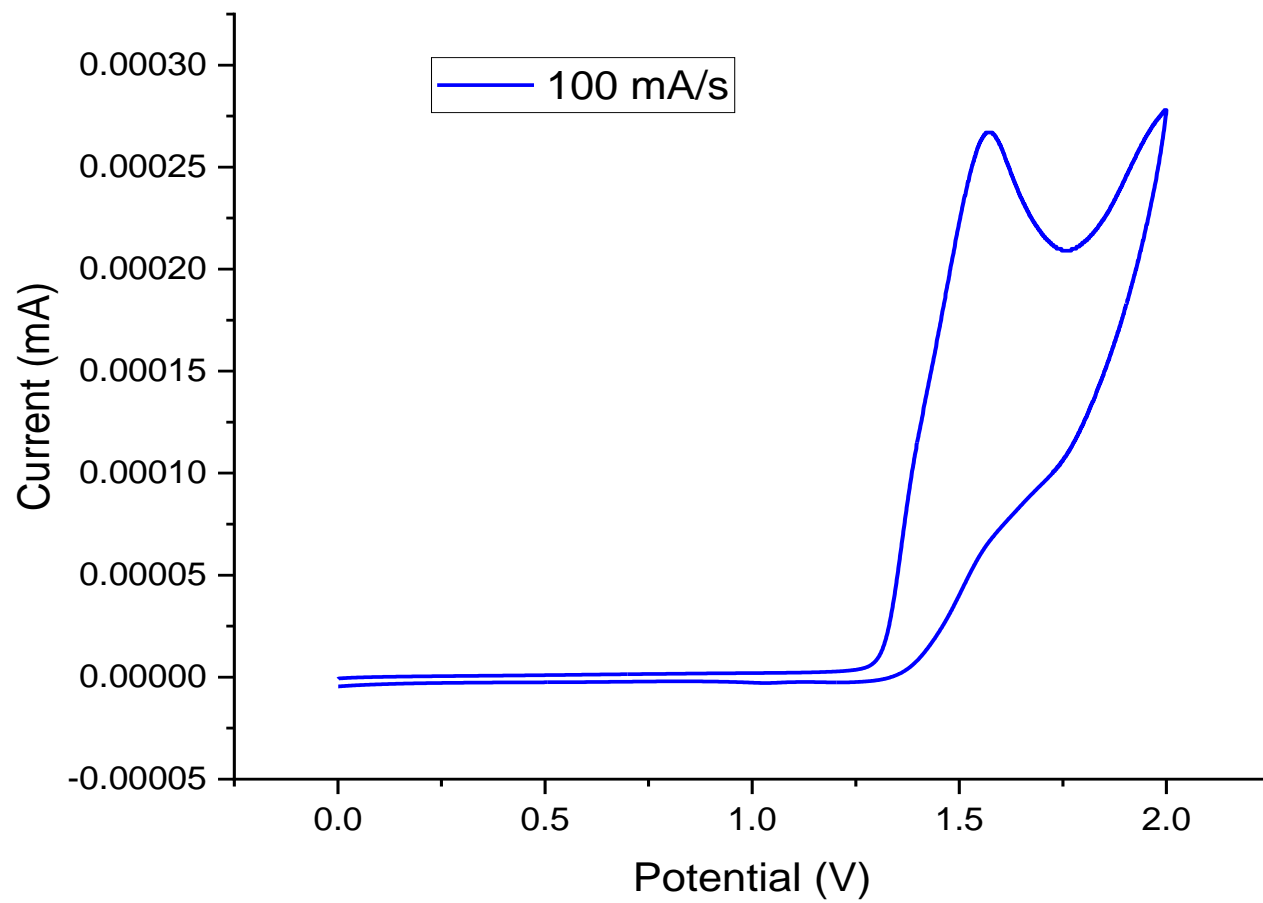

CV data of **15**

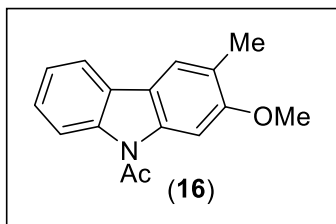

7.95  
7.94  
7.92  
7.88  
7.88  
7.86  
7.86  
7.69  
7.37  
7.37  
7.35  
7.35  
7.33  
7.33  
7.25

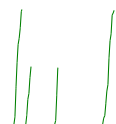

3.94

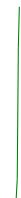

2.87

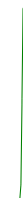

2.35

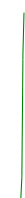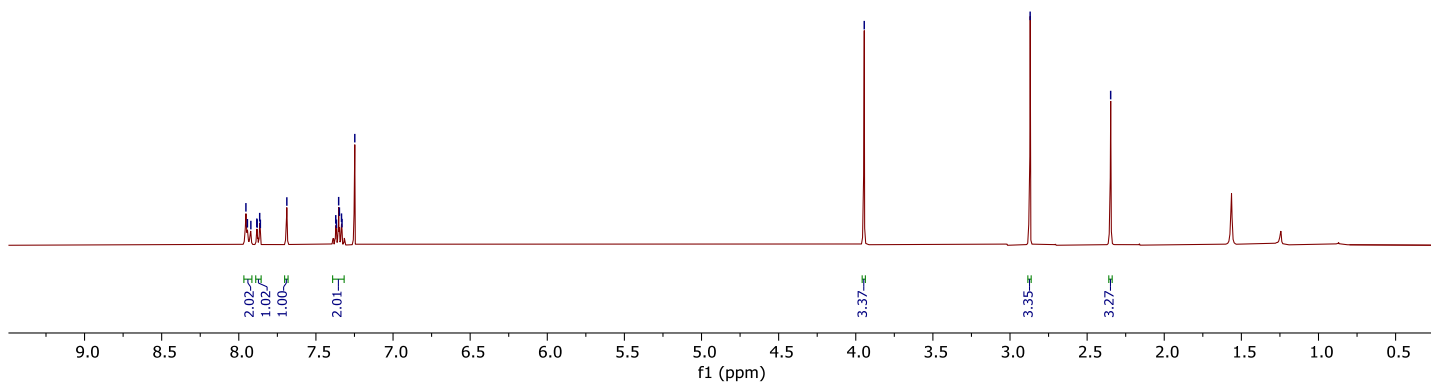

$^1\text{H}$  NMR (400 MHz,  $\text{CDCl}_3$ ) of **16**

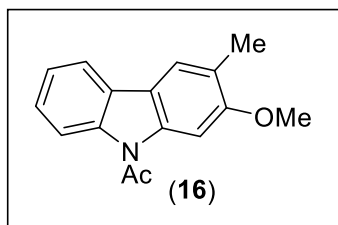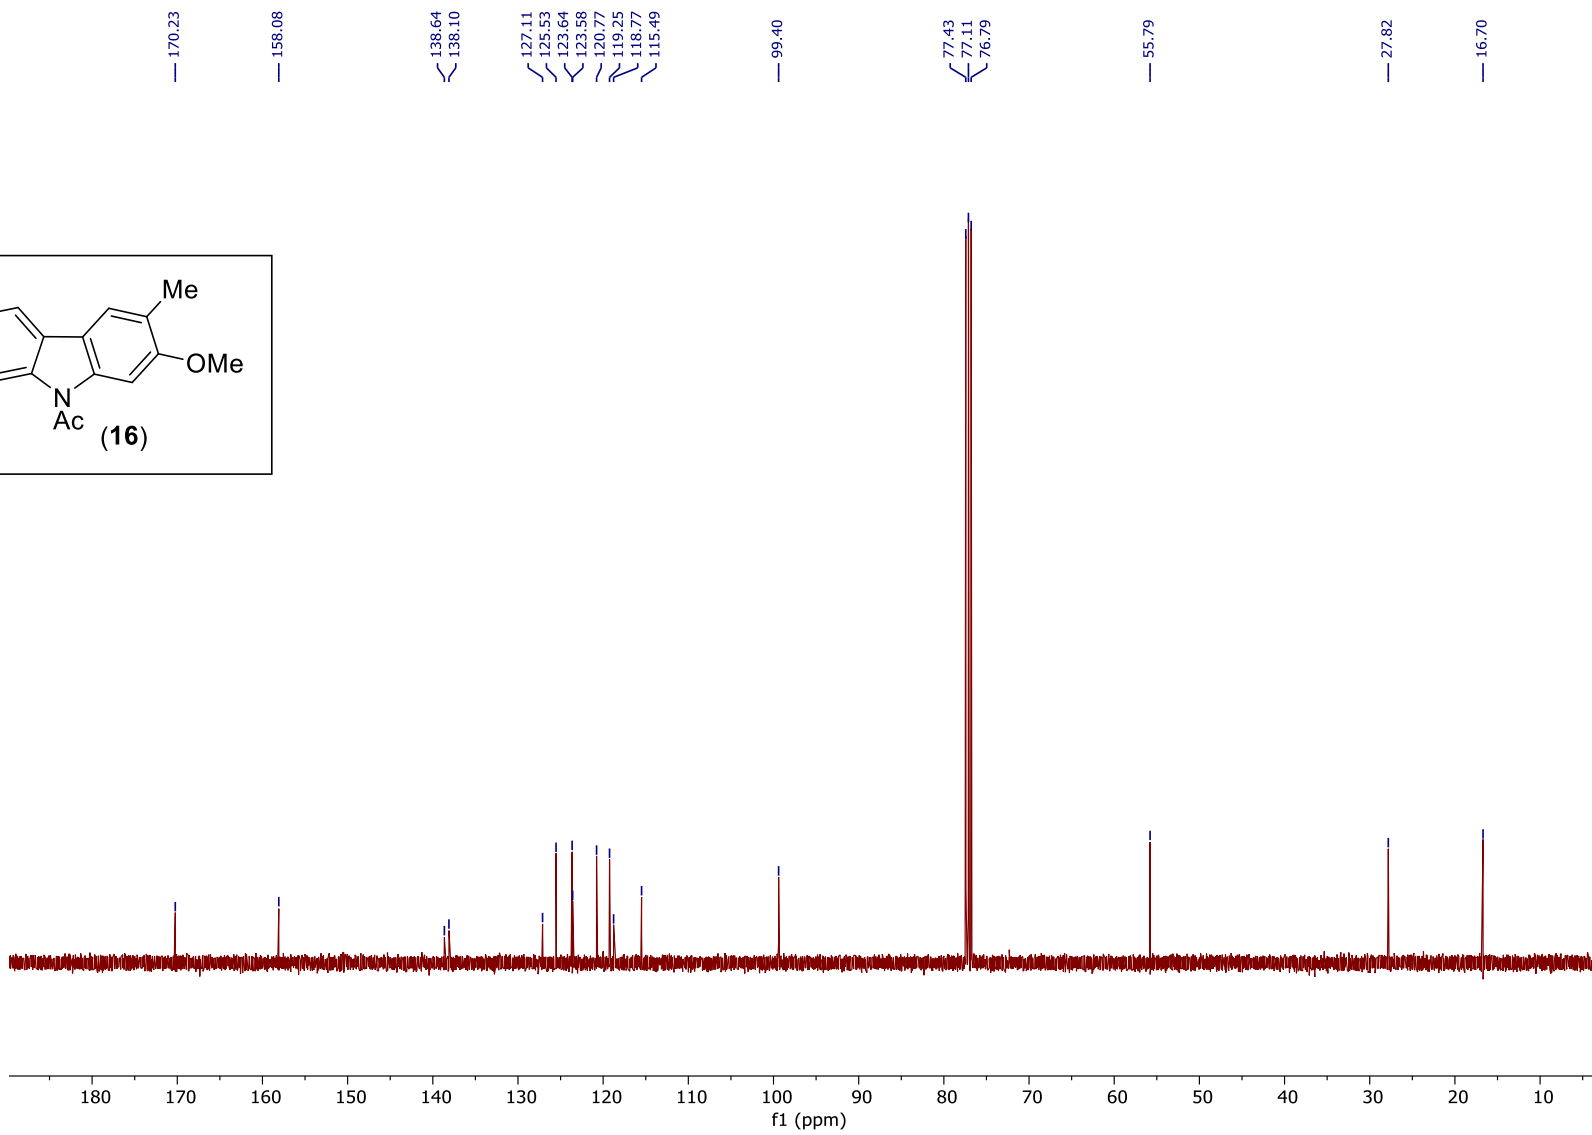

$^{13}\text{C}$  NMR (100 MHz,  $\text{CDCl}_3$ ) of **16**

AB28-Feb-2024 10:46:40  
AB-SUM-36EleSDM (0.053) Is (1.00,1.00) C16H16NO2

IISER - KOLKATA

1: TOF MS ES+  
8.33e12

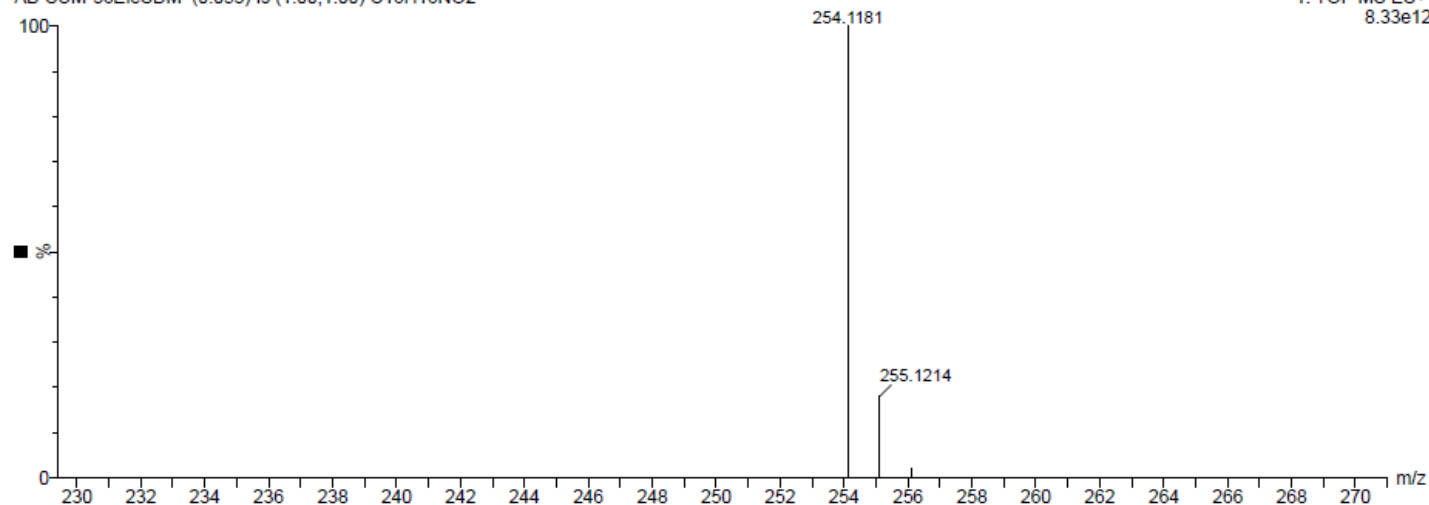

AB-SUM-36EleSDM 14 (0.293) AM2 (Ar,22000.0,556.28,0.00,LS 10); ABS

1: TOF MS ES+  
3.63e5

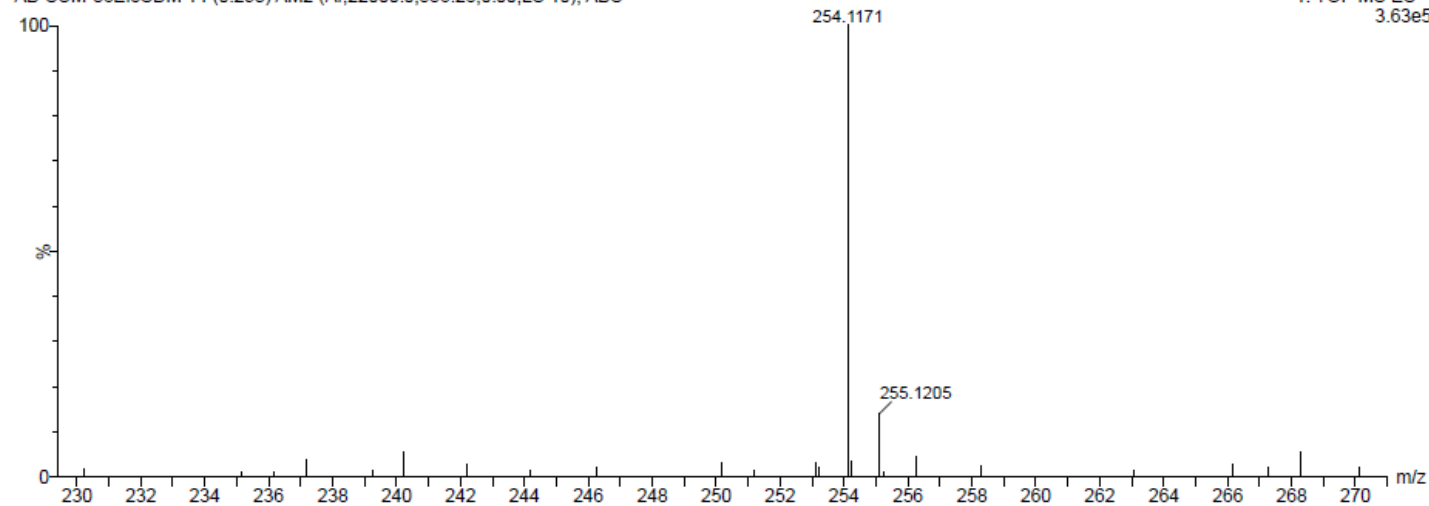

HRMS data of 16

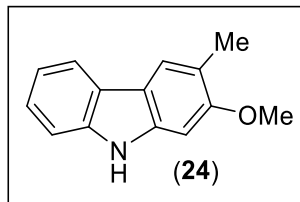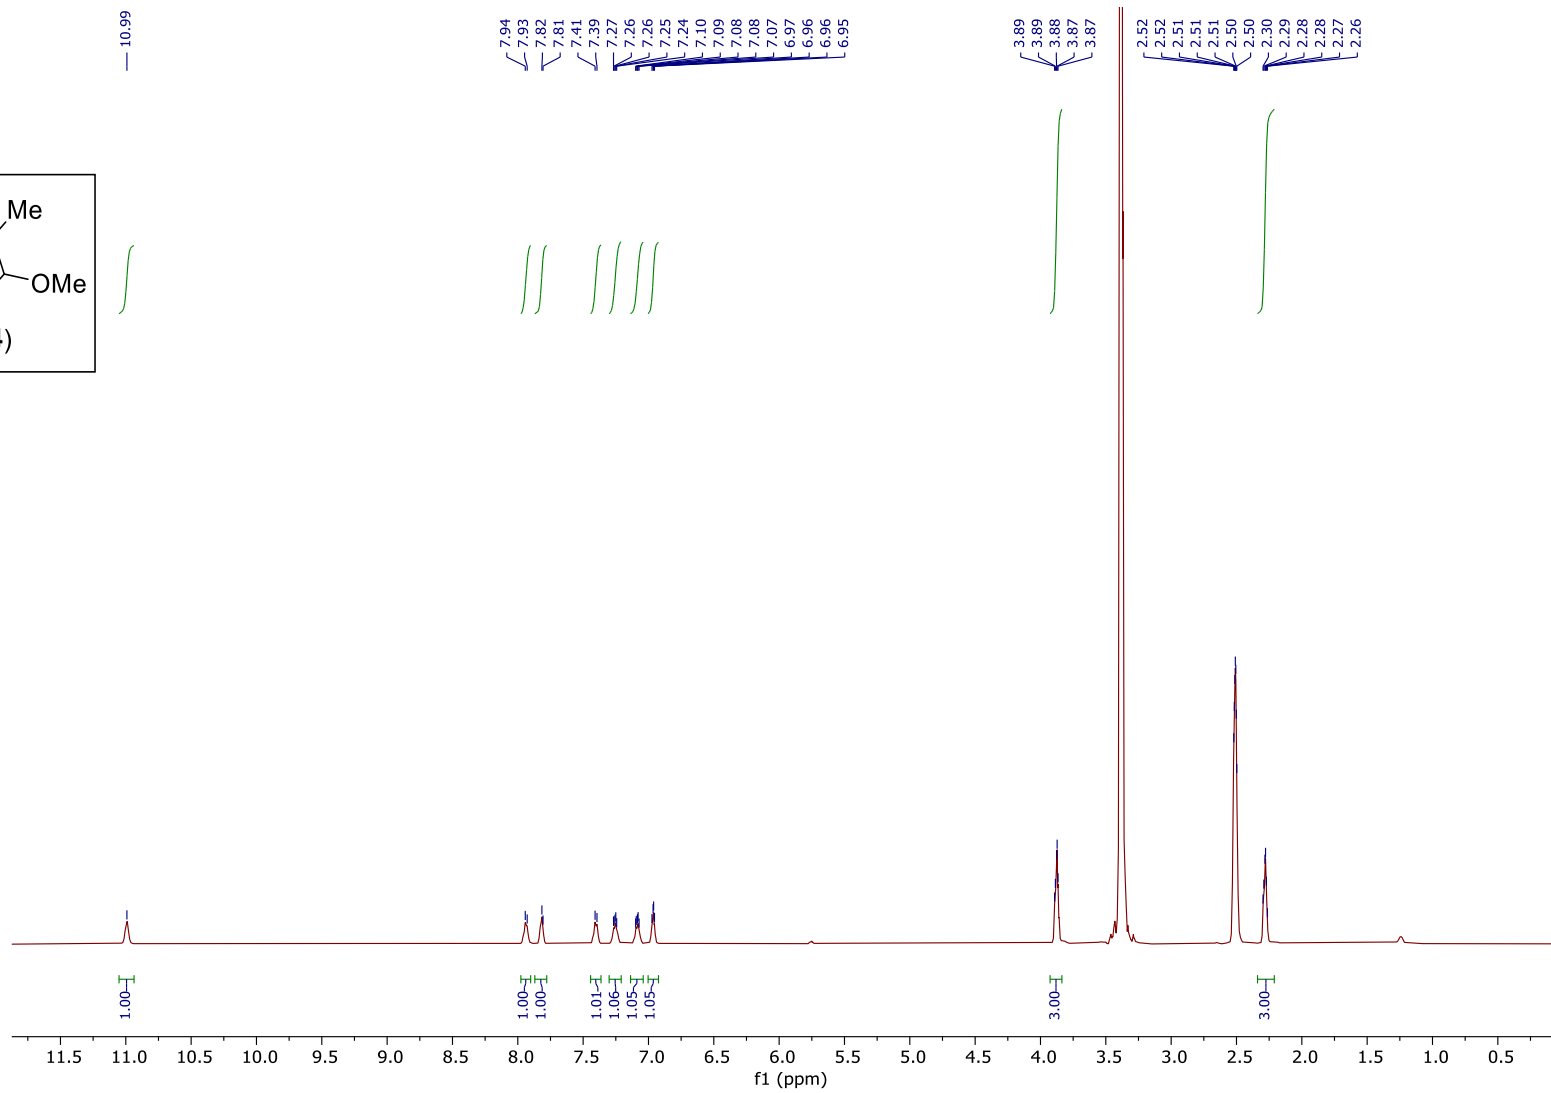

$^1\text{H}$  NMR (500 MHz,  $\text{DMSO-d}_6$ ) of **24**

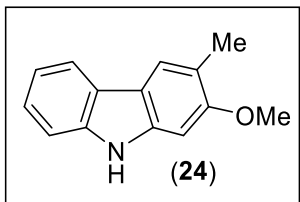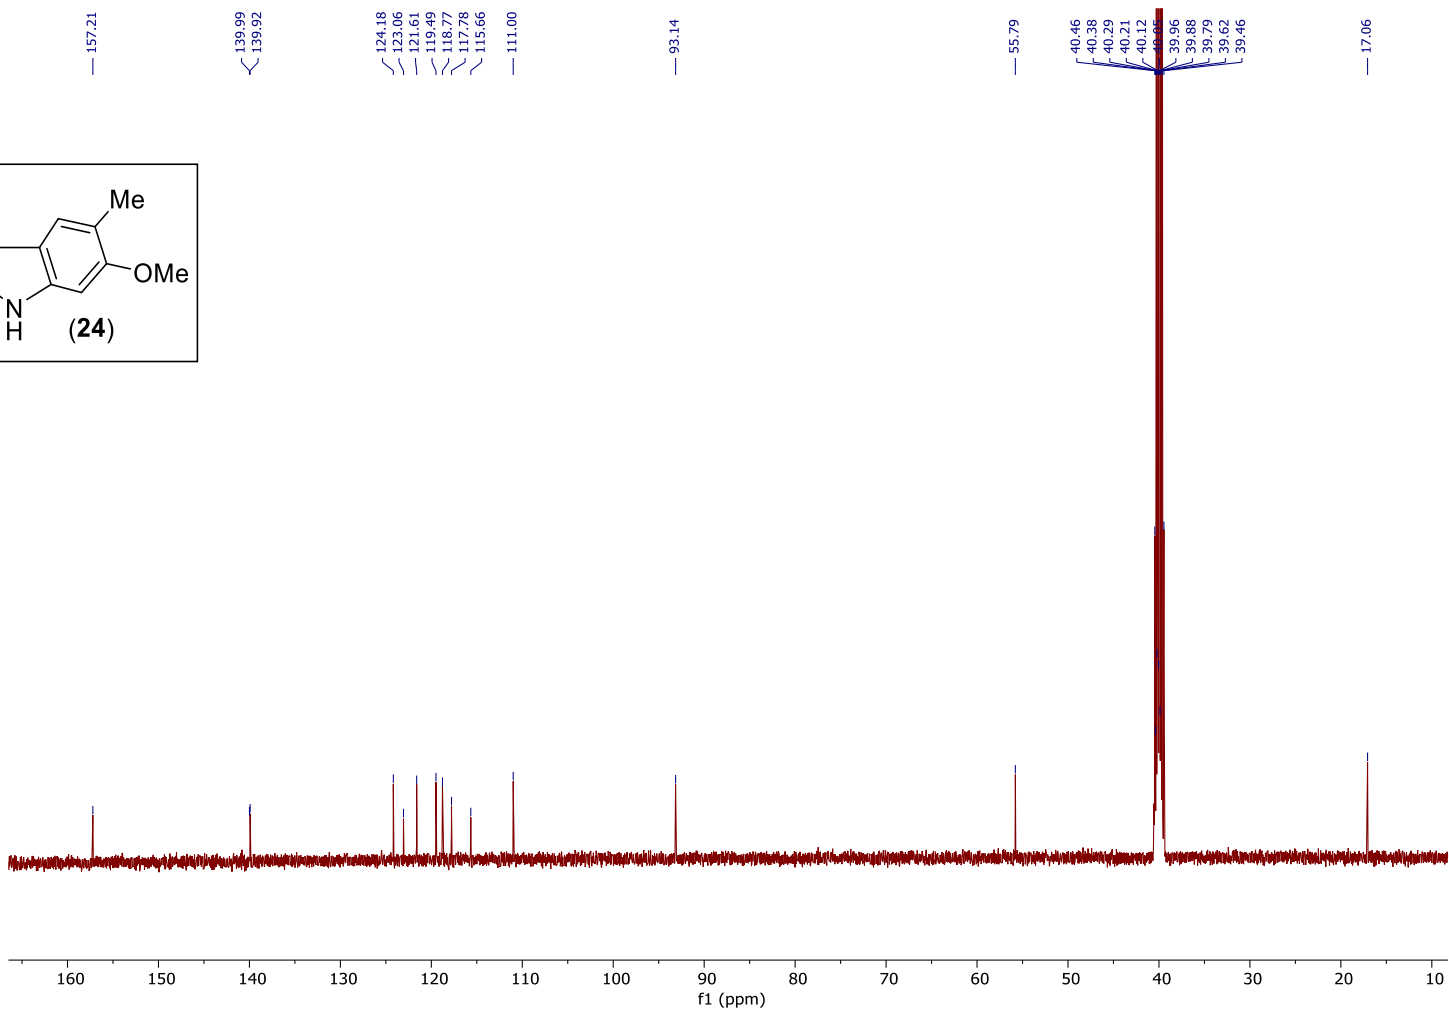

AB08-May-2024 12:52:34  
AB-SUM-SD390MEM (0.053) Is (1.00,1.00) C14H14NO

IISER - KOLKATA

1: TOF MS ES+  
8.54e12

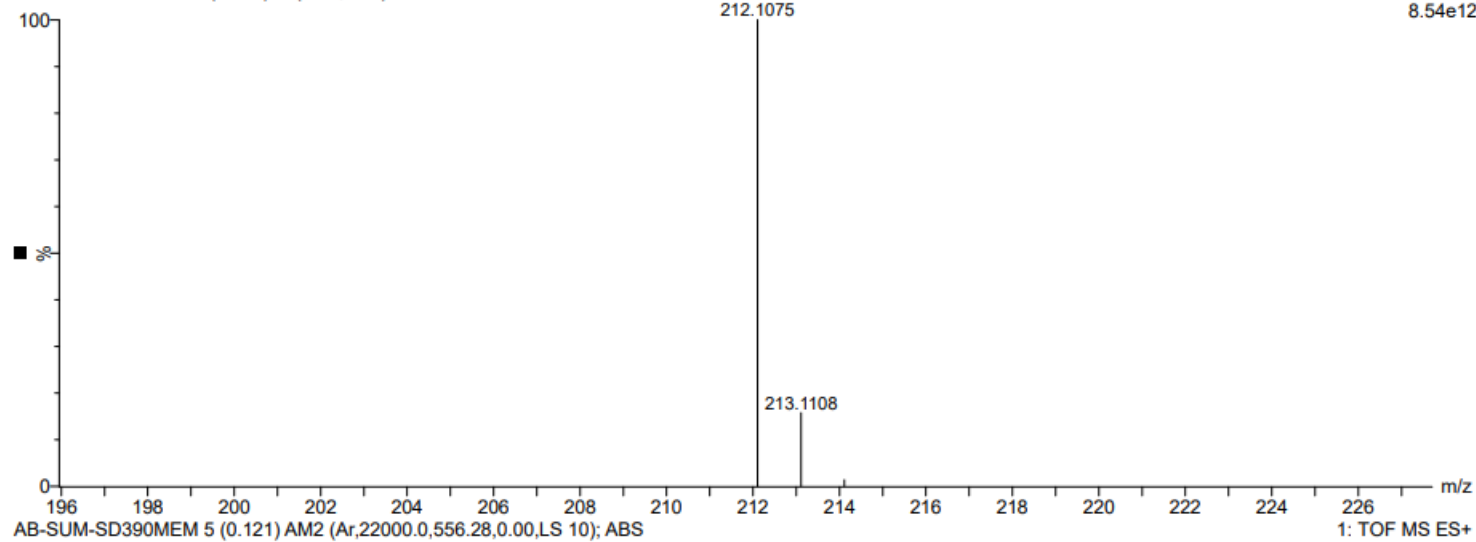

AB-SUM-SD390MEM 5 (0.121) AM2 (Ar,22000.0,556.28,0.00,LS 10); ABS

1: TOF MS ES+  
5.21e5

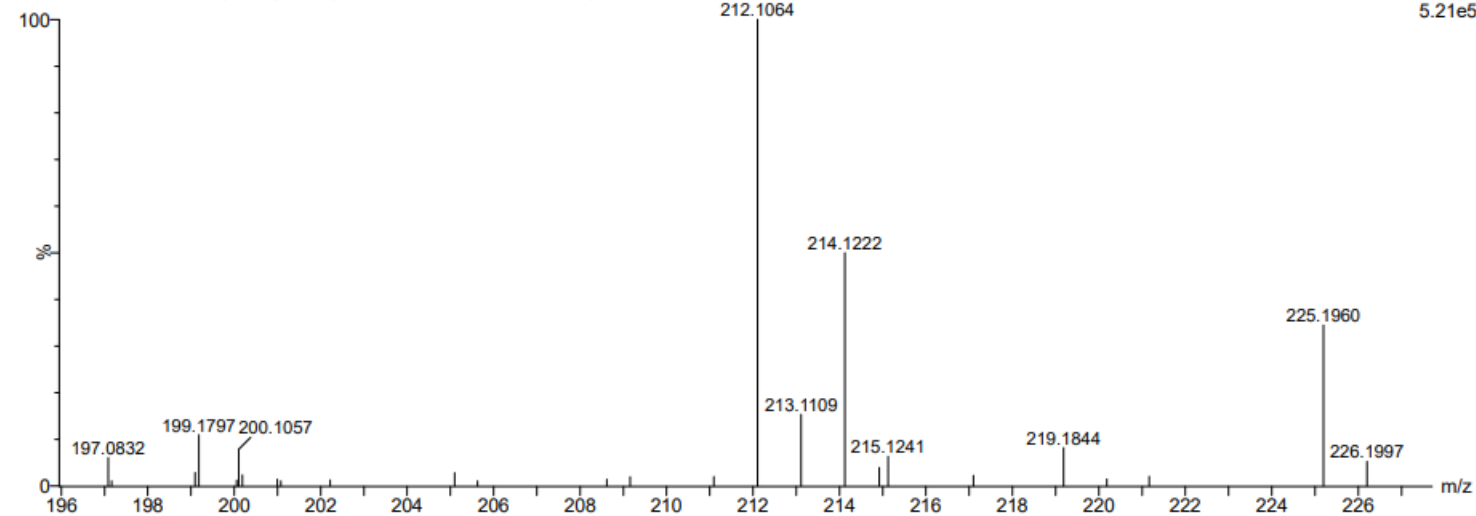

HRMS data of 24

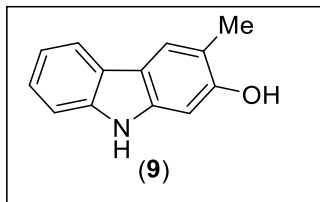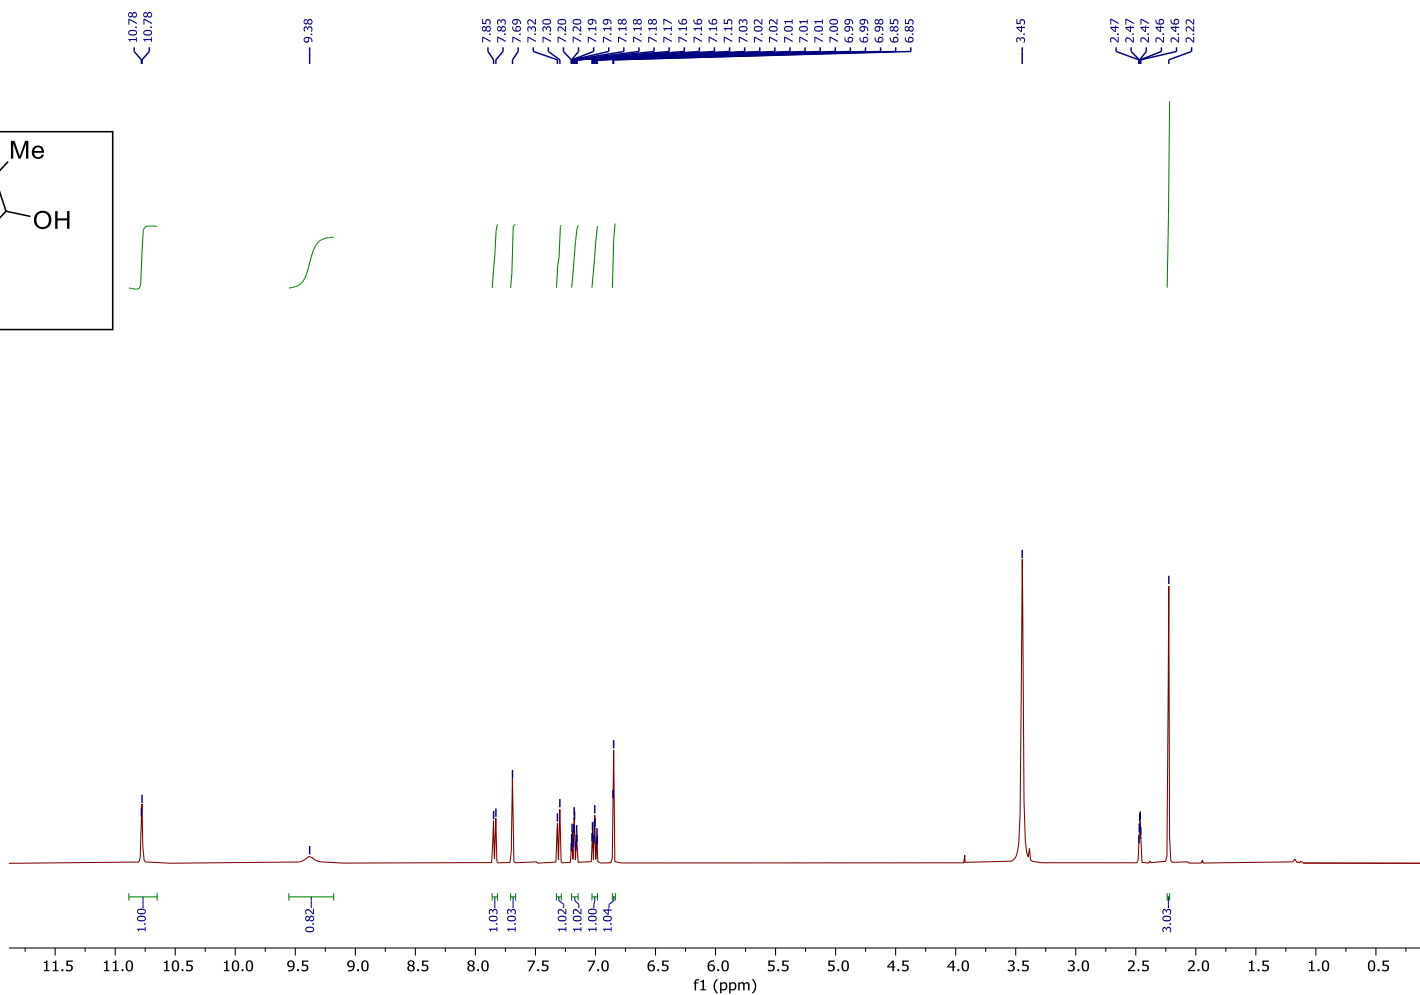

$^1\text{H}$  NMR (400 MHz,  $\text{DMSO-d}_6$ ) of **9**



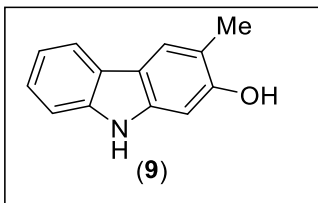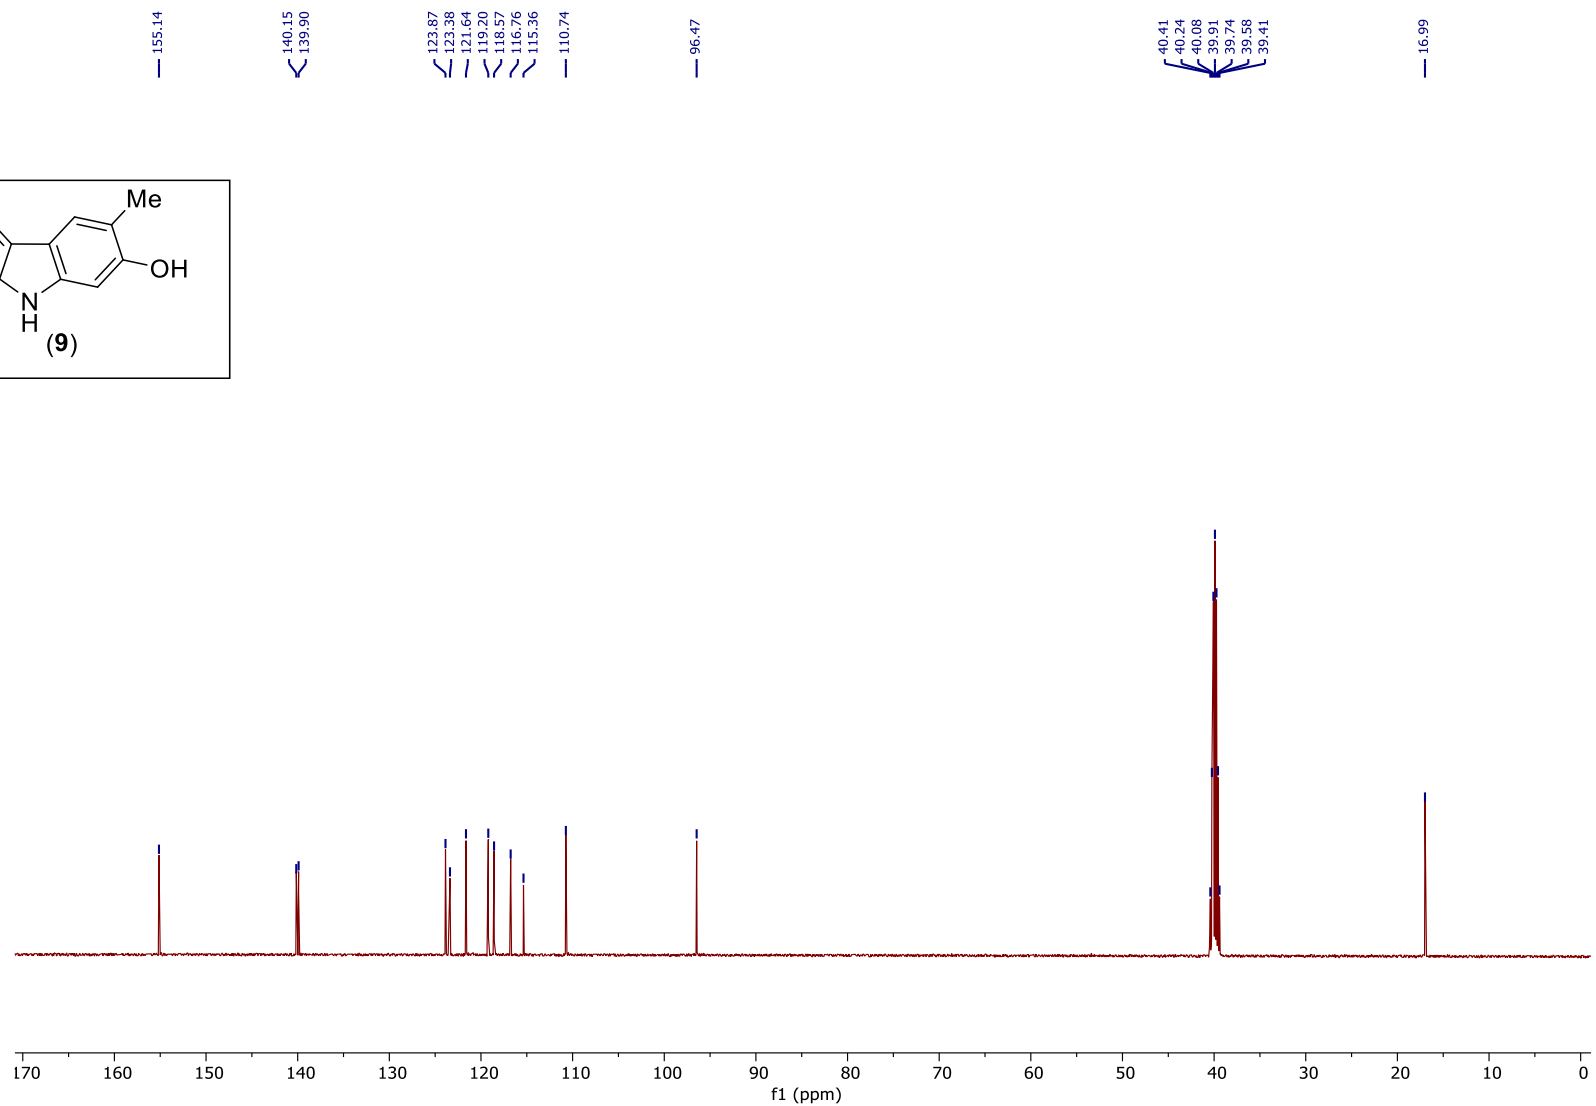

$^{13}\text{C}$  NMR (125 MHz, DMSO- $d_6$ ) of **9**

AB06-May-2024 11:48:48

AB-SUM-SD400HM (0.070) Is (1.00,1.00) C13H12NO

IISER - KOLKATA

1: TOF MS ES+  
8.63e12

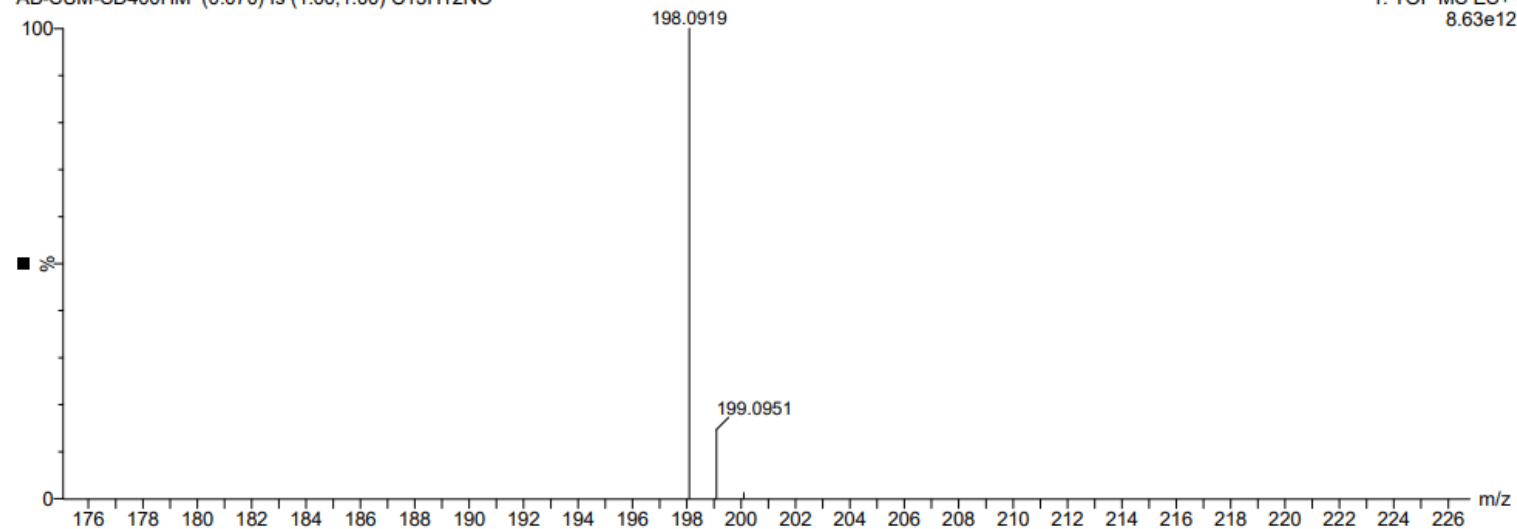

AB-SUM-SD400HM 2 (0.070)

1: TOF MS ES+  
2.85e6

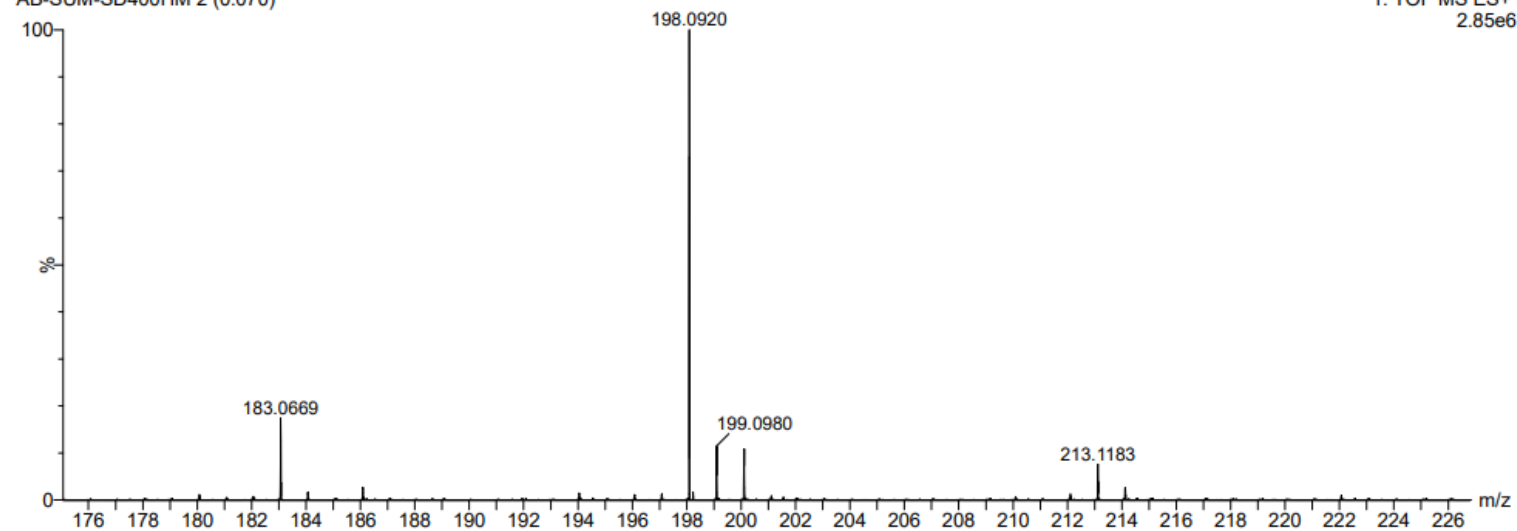

HRMS data of 9

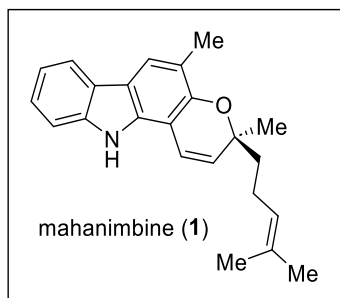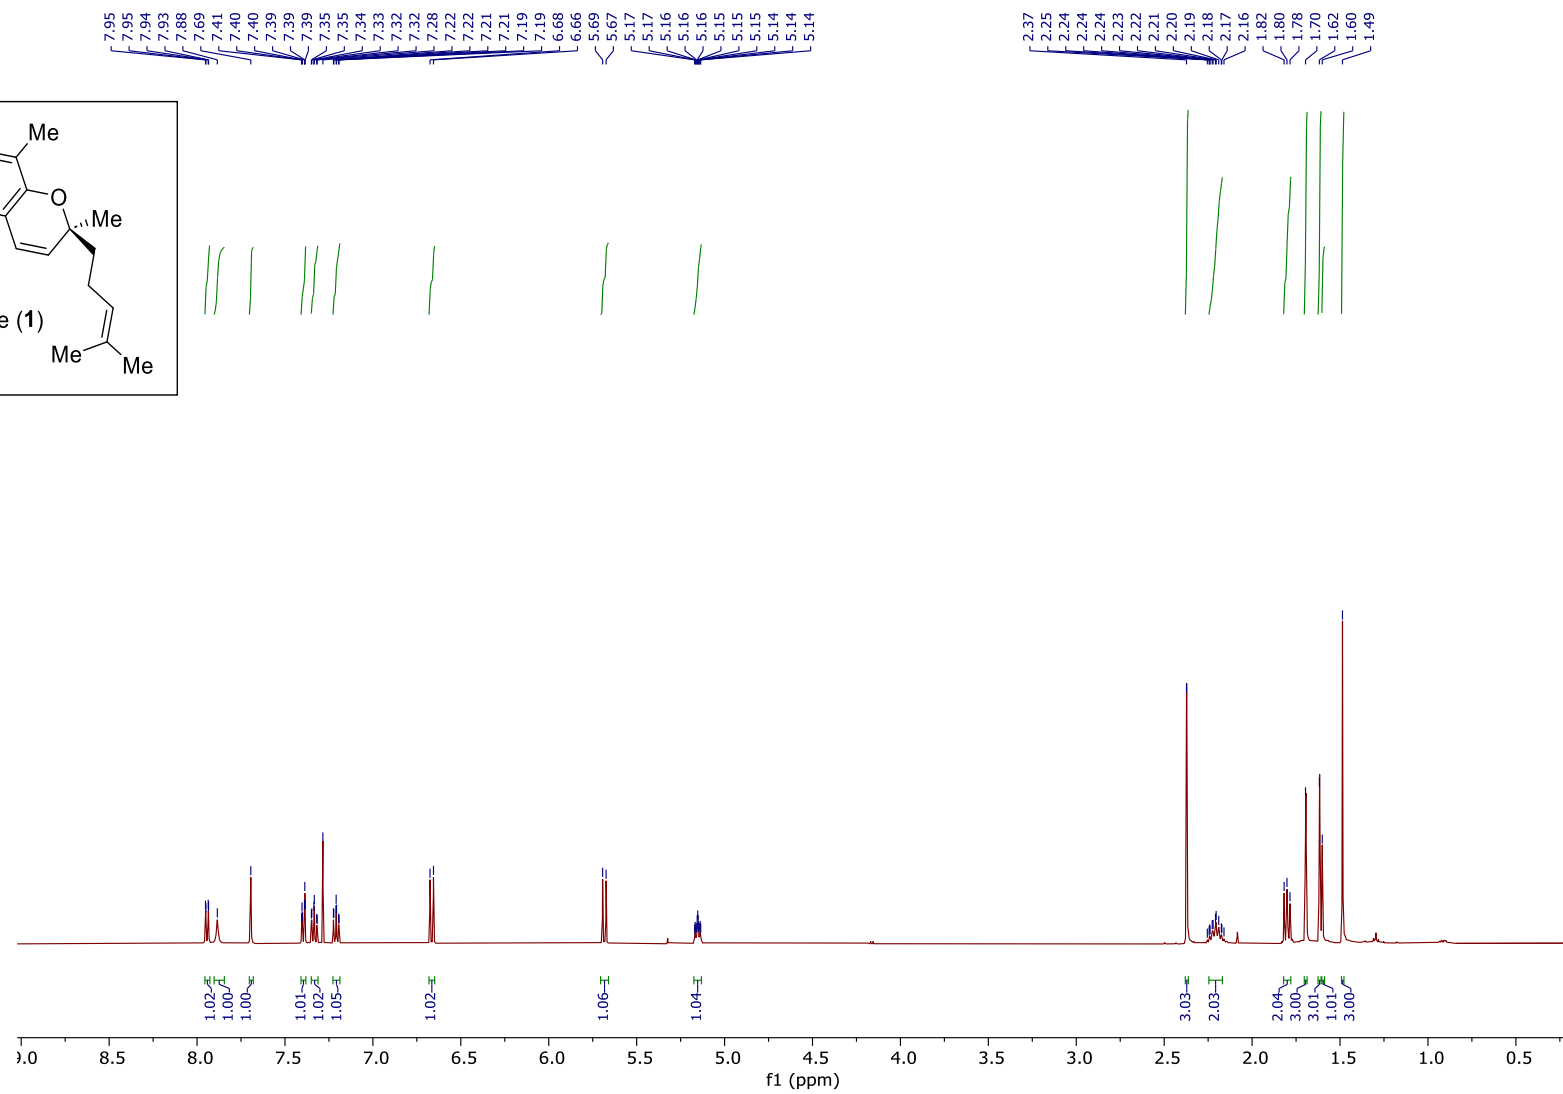

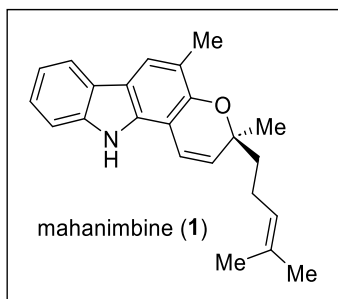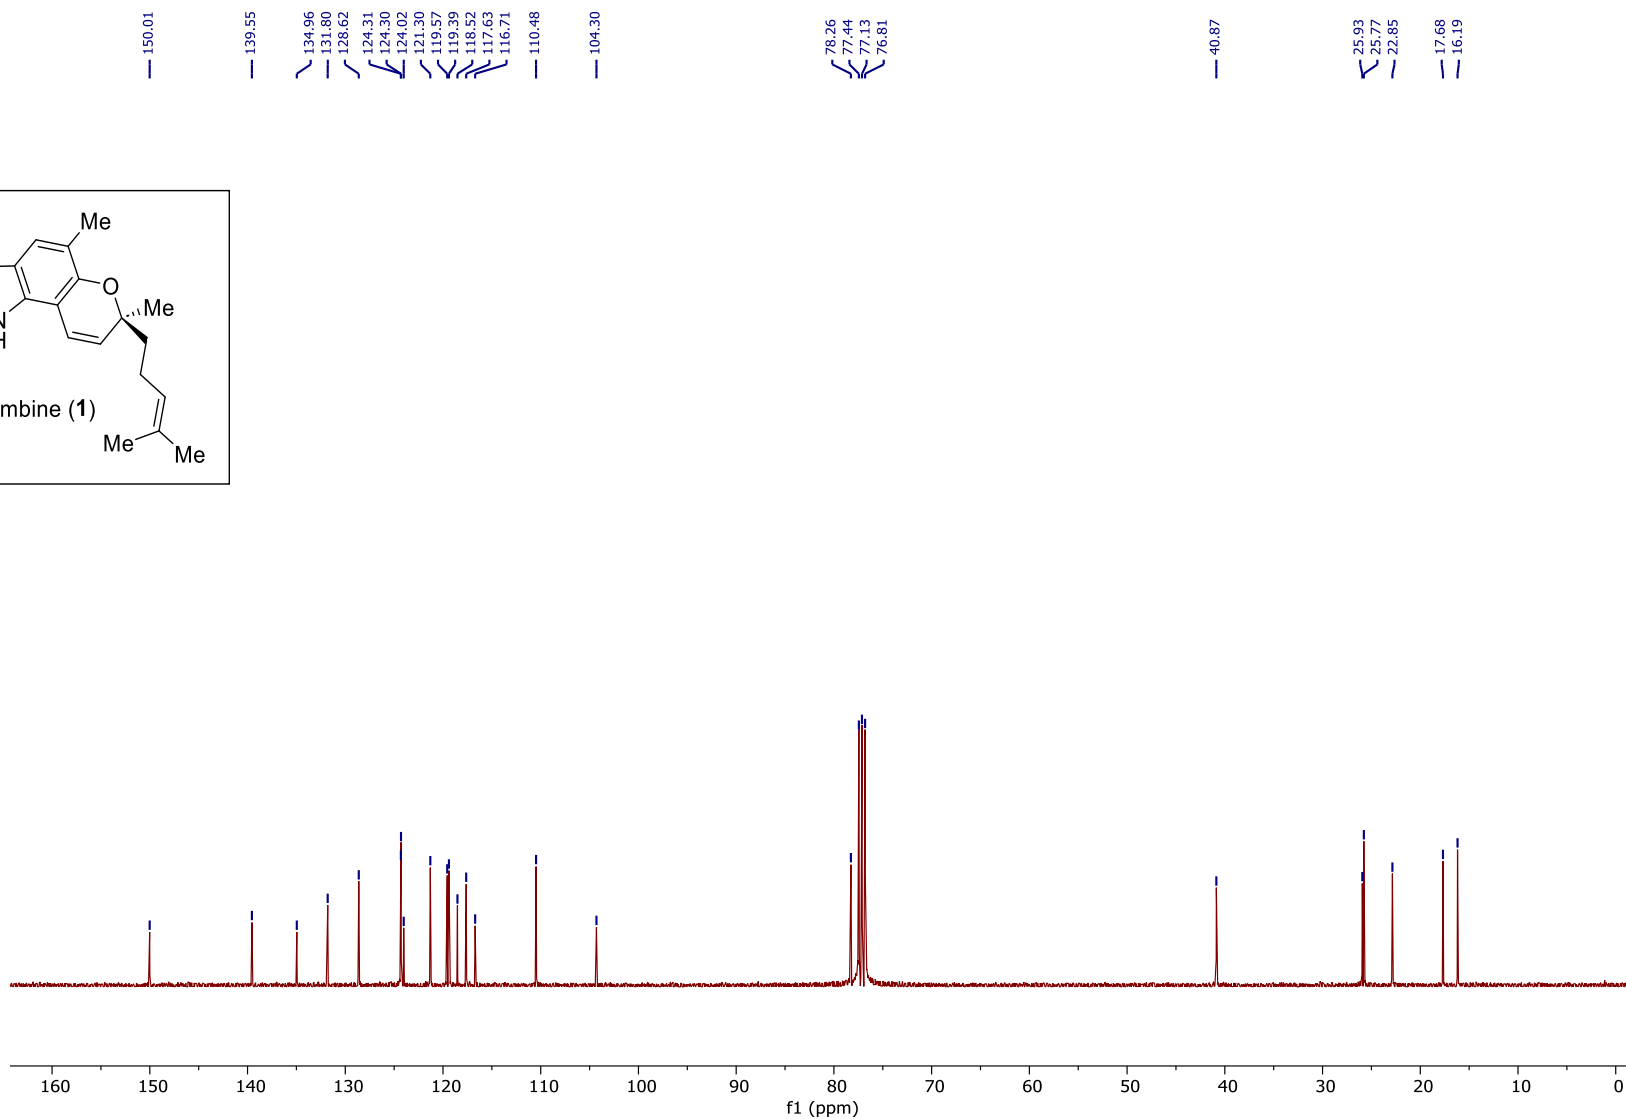

AB30-Apr-2024 11:49:17  
AB-SUM-SDM (0.053) Is (1.00,1.00) C23H26NO

IISER - KOLKATA

1: TOF MS ES+  
7.74e12

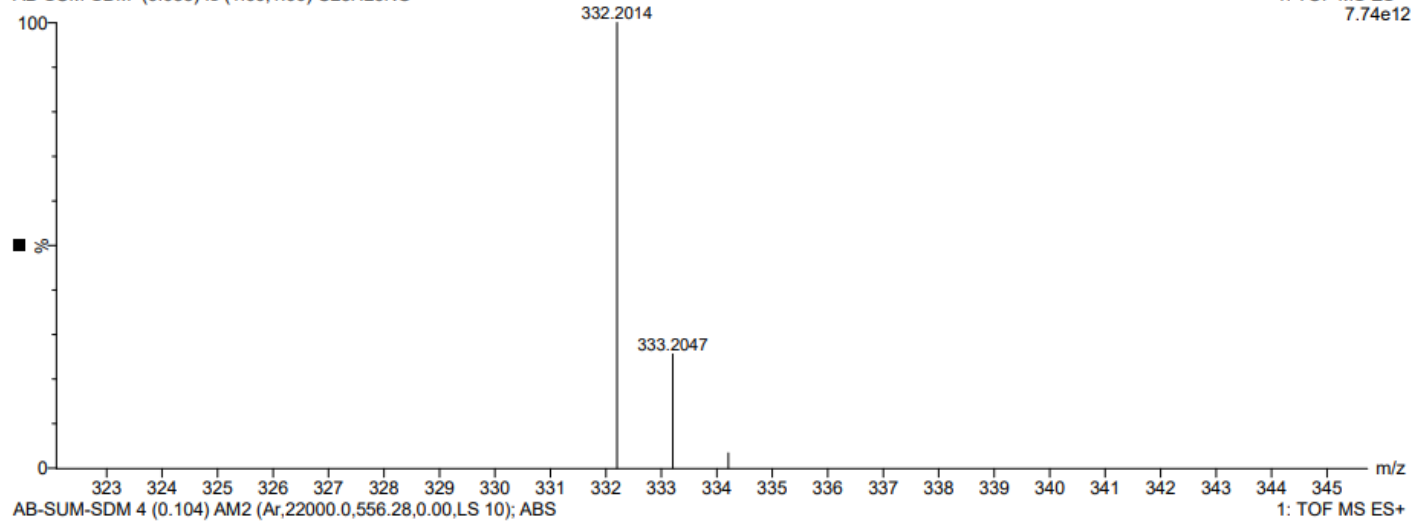

AB-SUM-SDM 4 (0.104) AM2 (Ar,22000.0,556.28,0.00,LS 10); ABS

1: TOF MS ES+  
7.47e6

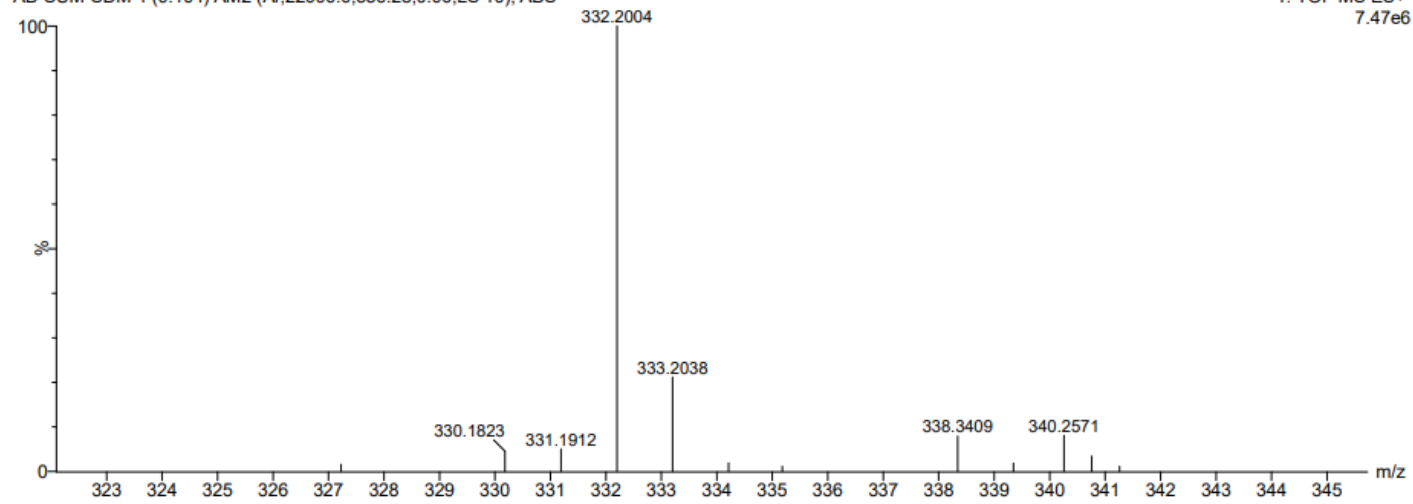

HRMS data of 1

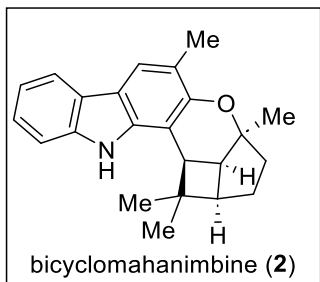

7.96  
7.96  
7.95  
7.95  
7.77  
7.77  
7.45  
7.41  
7.41  
7.41  
7.40  
7.39  
7.34  
7.33  
7.32  
7.32  
7.31  
7.30  
7.21  
7.20  
7.20  
7.18  
7.18

3.33  
3.32  
2.75  
2.74  
2.73  
2.72  
2.55  
2.55  
2.54  
2.53  
2.53  
2.52  
2.52  
2.38  
2.14  
2.13  
2.11  
2.10  
2.08  
2.07  
2.07  
1.79  
1.77  
1.77  
1.76  
1.76  
1.75  
1.75  
1.74  
1.74  
1.70  
1.69  
1.69  
1.68  
1.67  
1.66  
1.59  
1.58  
1.47  
0.78

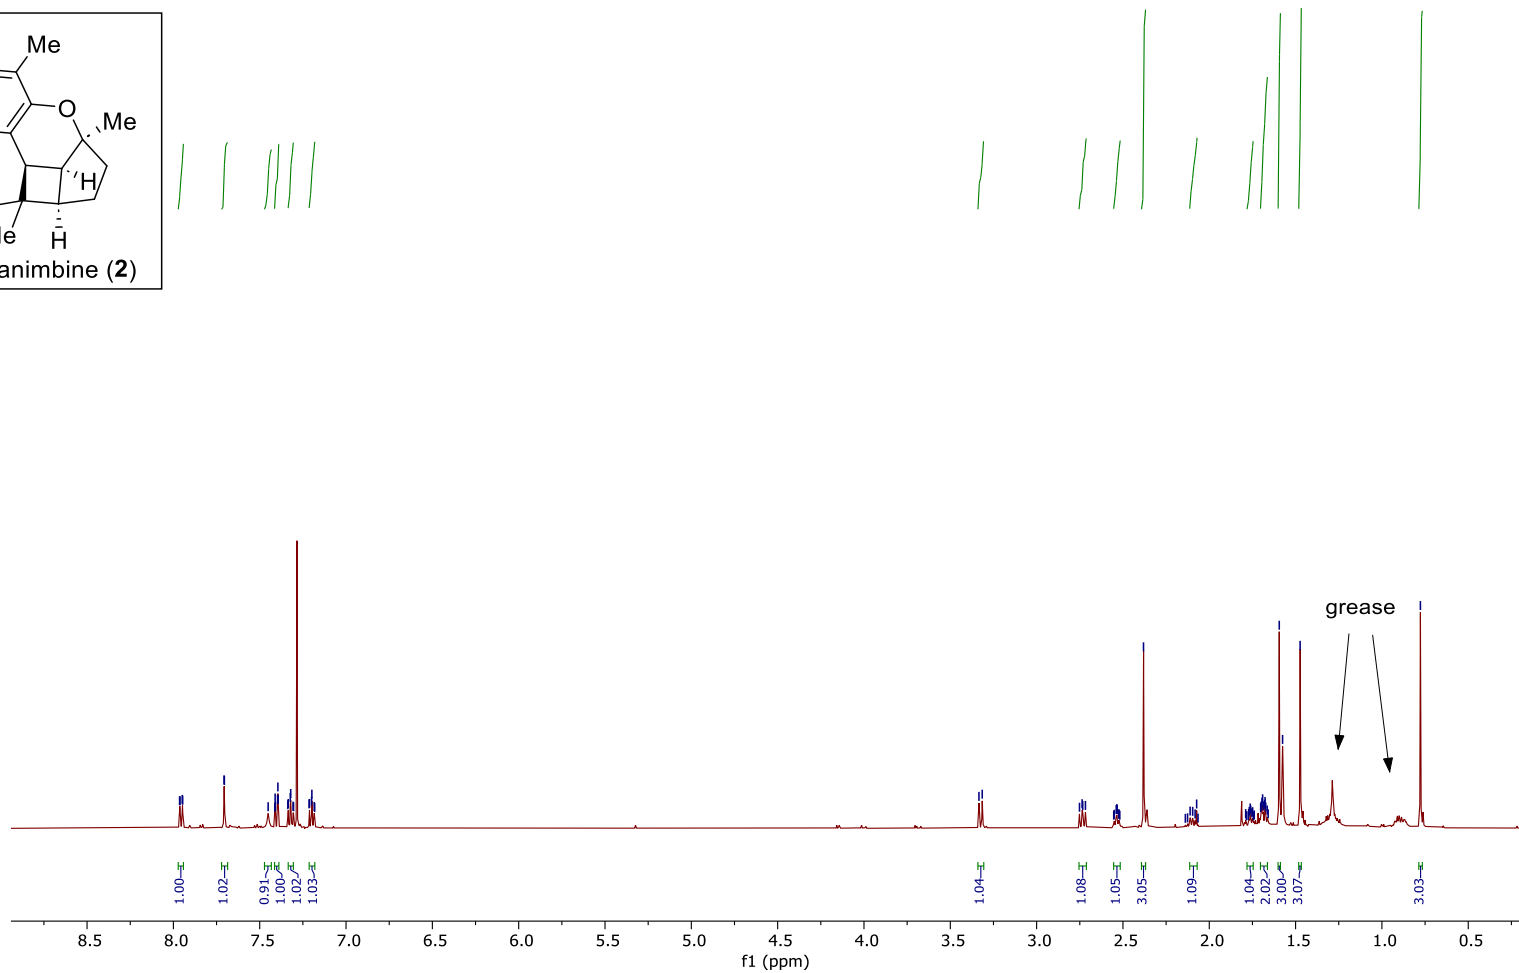

$^1\text{H}$  NMR (500 MHz,  $\text{CDCl}_3$ ) of 2

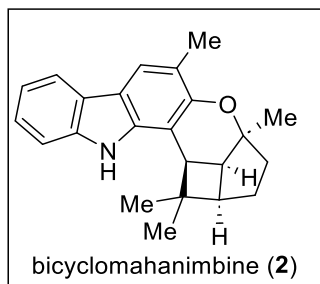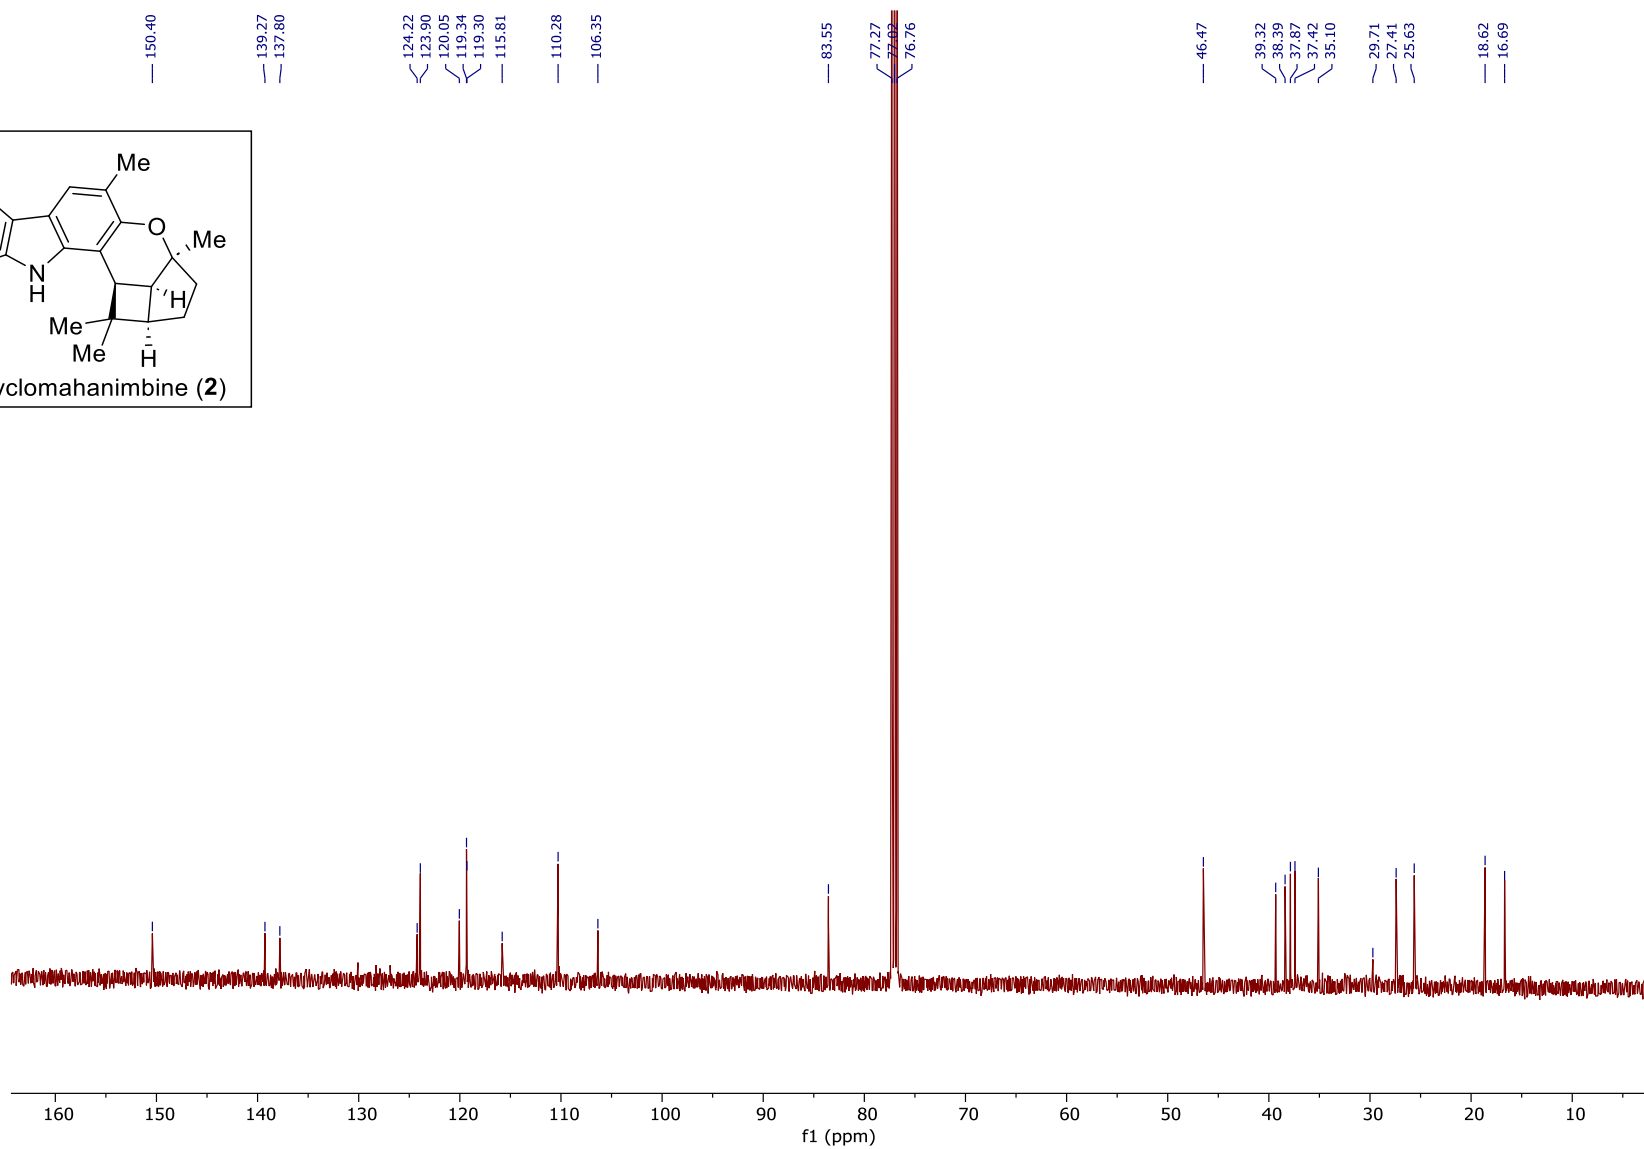

$^{13}\text{C}$  NMR (125 MHz,  $\text{CDCl}_3$ ) of **2**

AB15-Nov-2023 12:45:25

IISER - KOLKATA

1: TOF MS ES+  
7.74e12

AB-SUM-107BIM (0.053) Is (1.00,1.00) C<sub>23</sub>H<sub>26</sub>NO

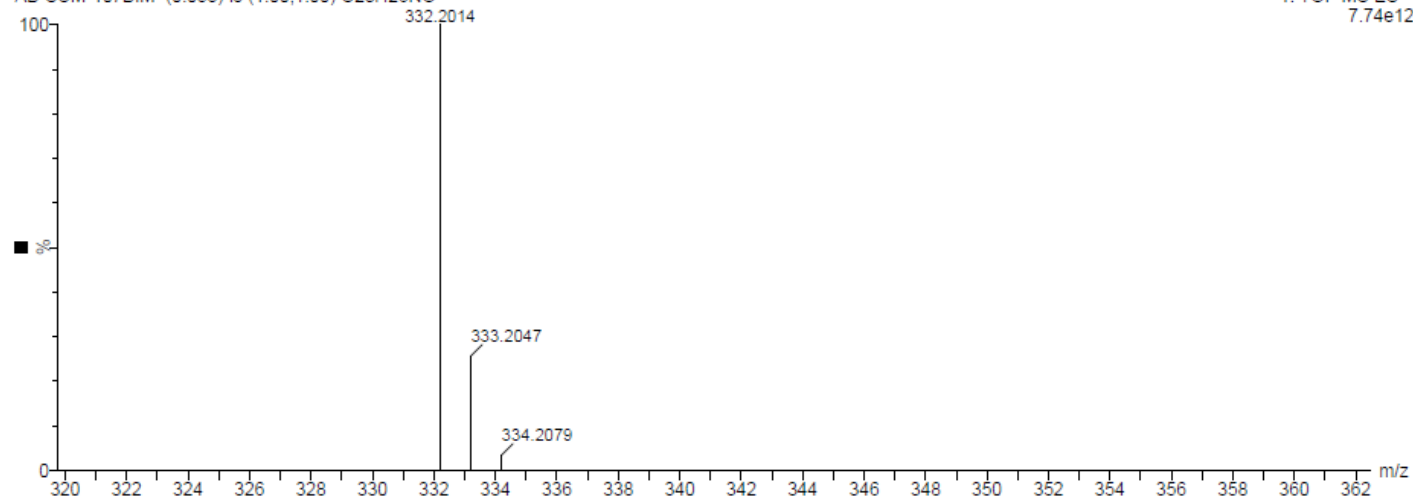

AB-SUM-107BIM 6 (0.138) AM2 (Ar,22000.0,556.28,0.00,LS 10); ABS

1: TOF MS ES+  
2.39e6

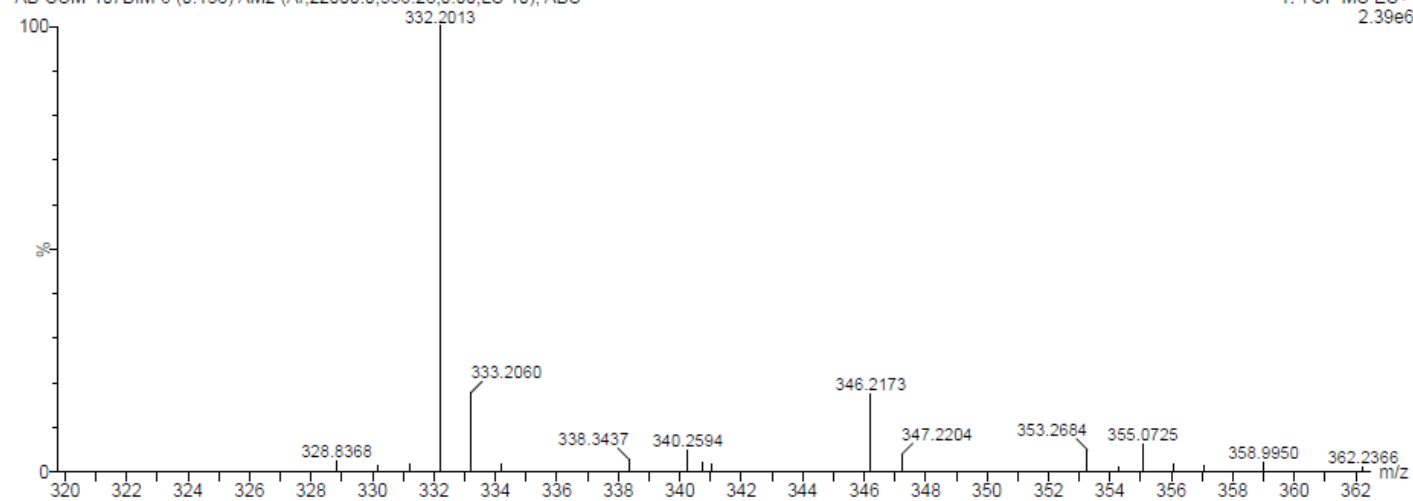

HRMS data of 2



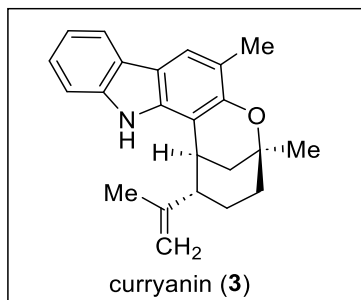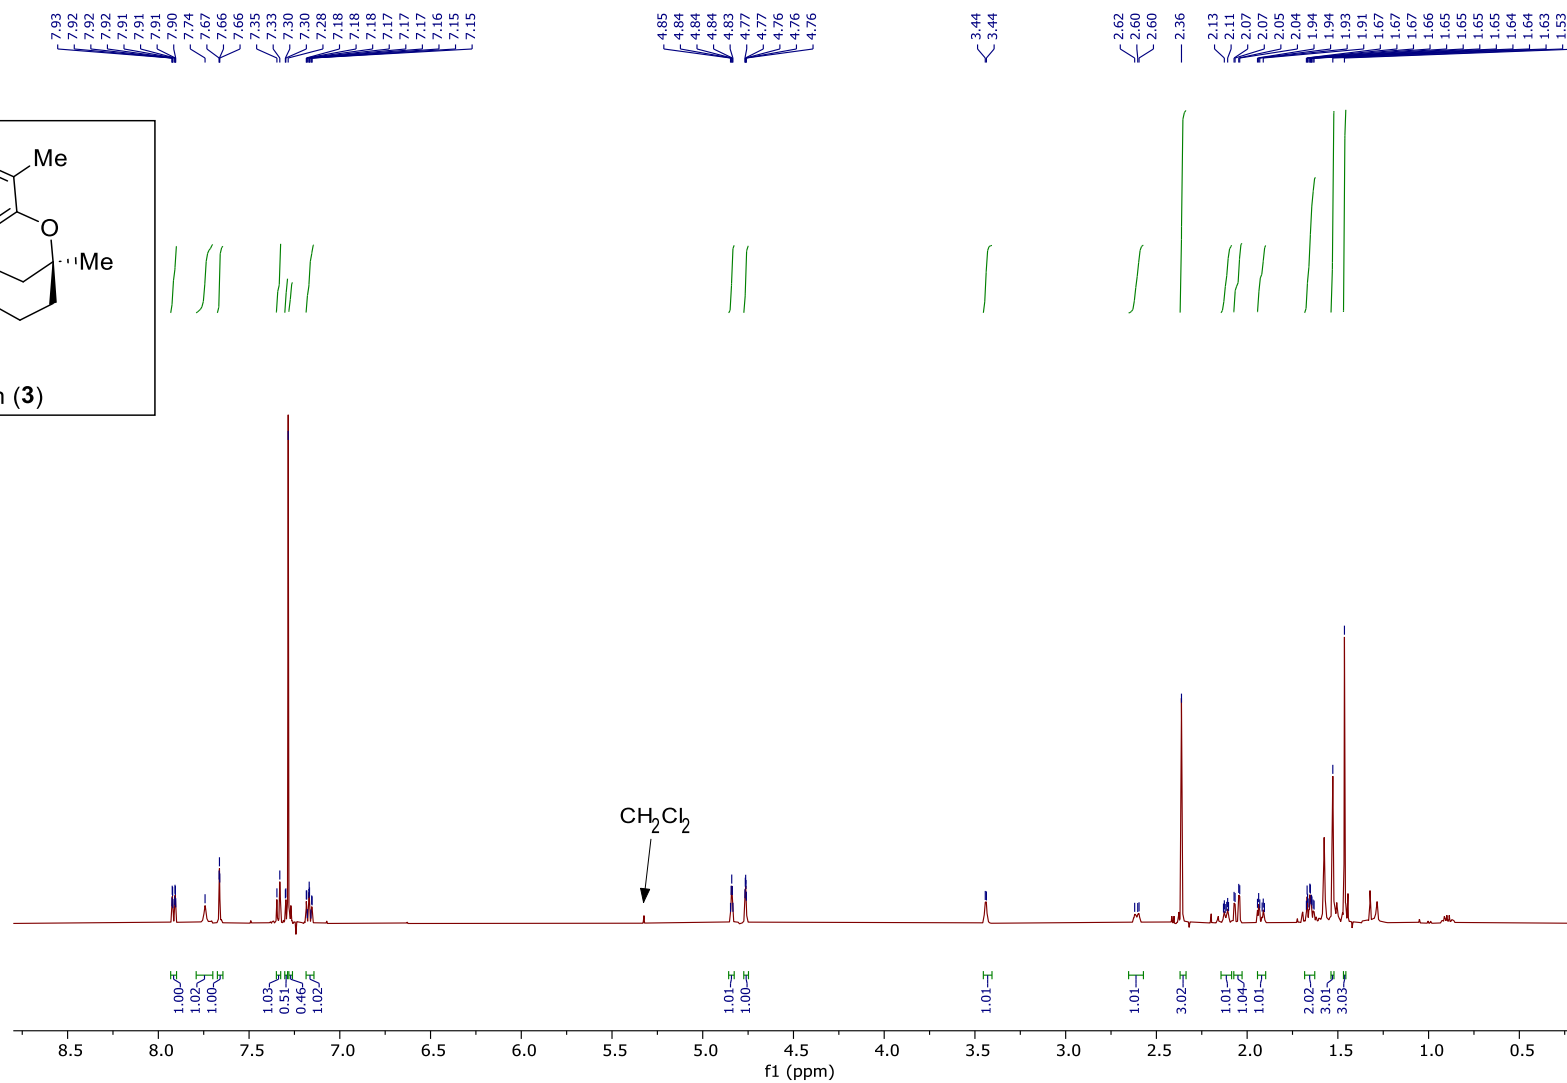

<sup>1</sup>H NMR (500 MHz, CDCl<sub>3</sub>) of 3

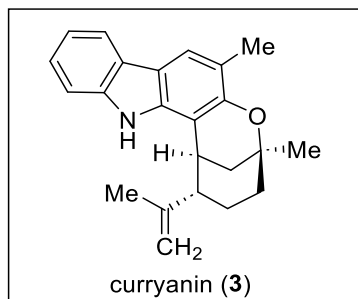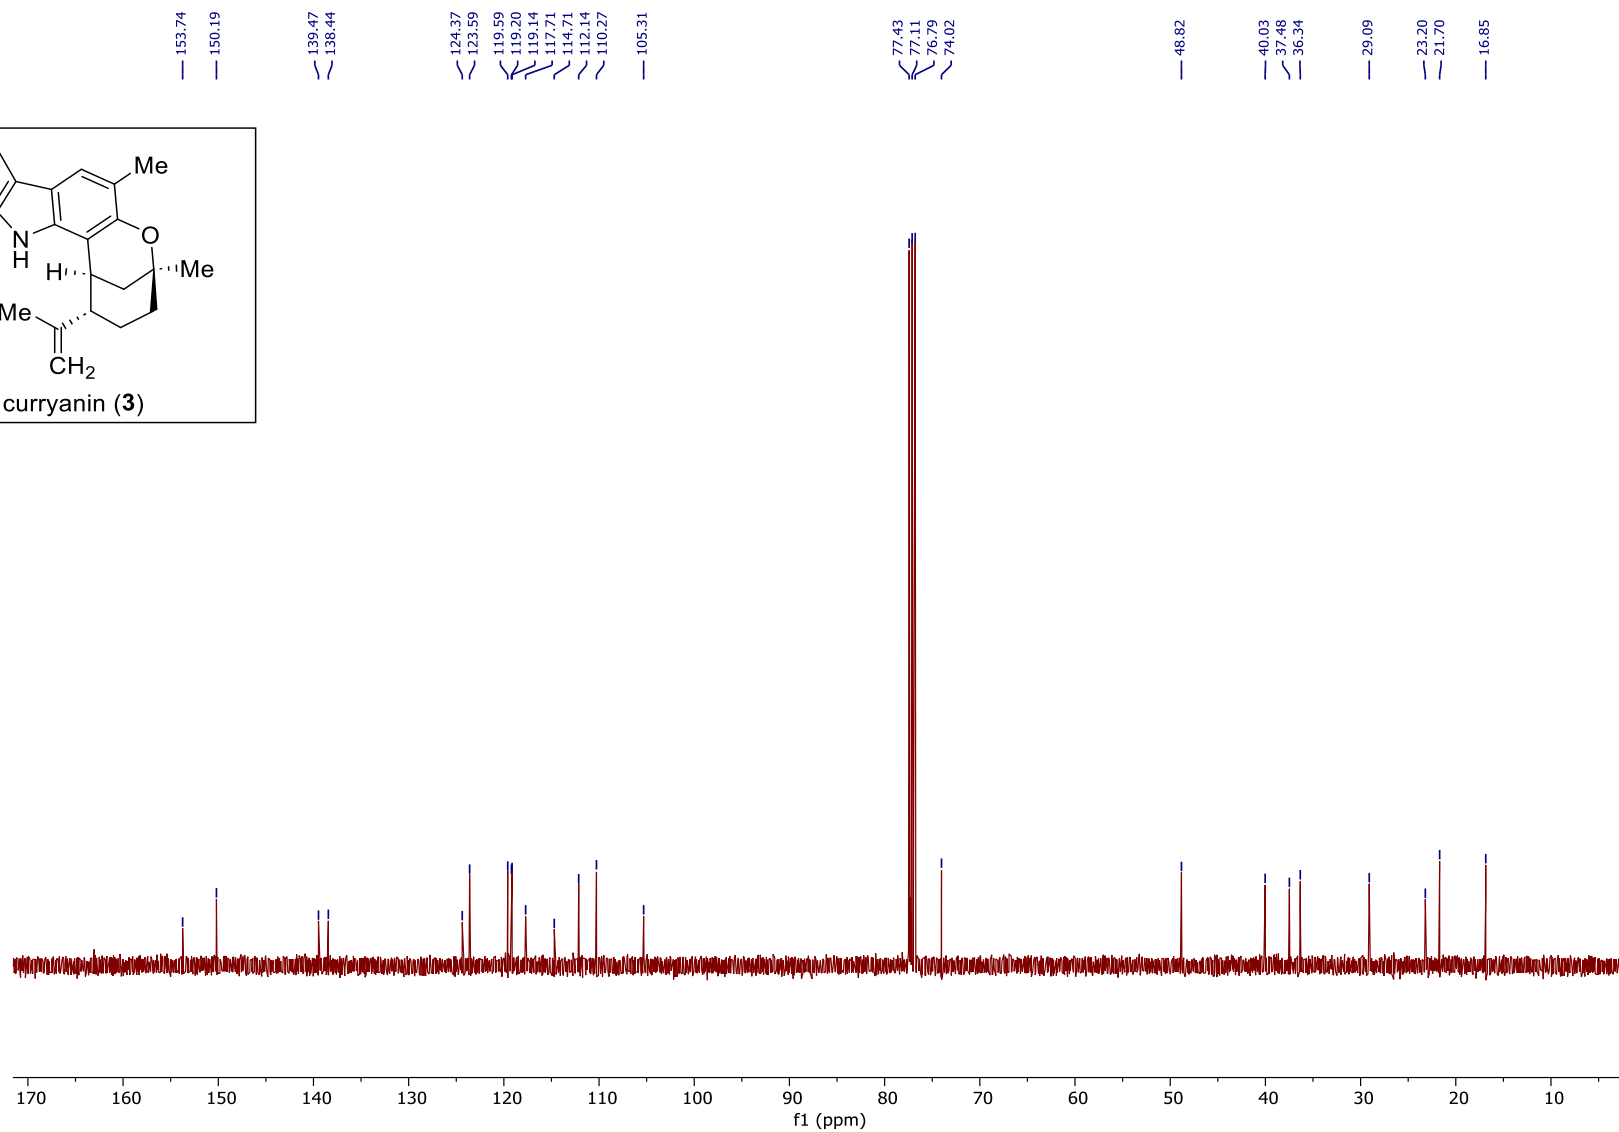

<sup>13</sup>C NMR (100 MHz, CDCl<sub>3</sub>) of 3

AB04-Mar-2024 11:55:45  
AB-SUM-SD11CN (0.053) Is (1.00,1.00) C23H26NO

IISER - KOLKATA

1: TOF MS ES+  
7.74e12

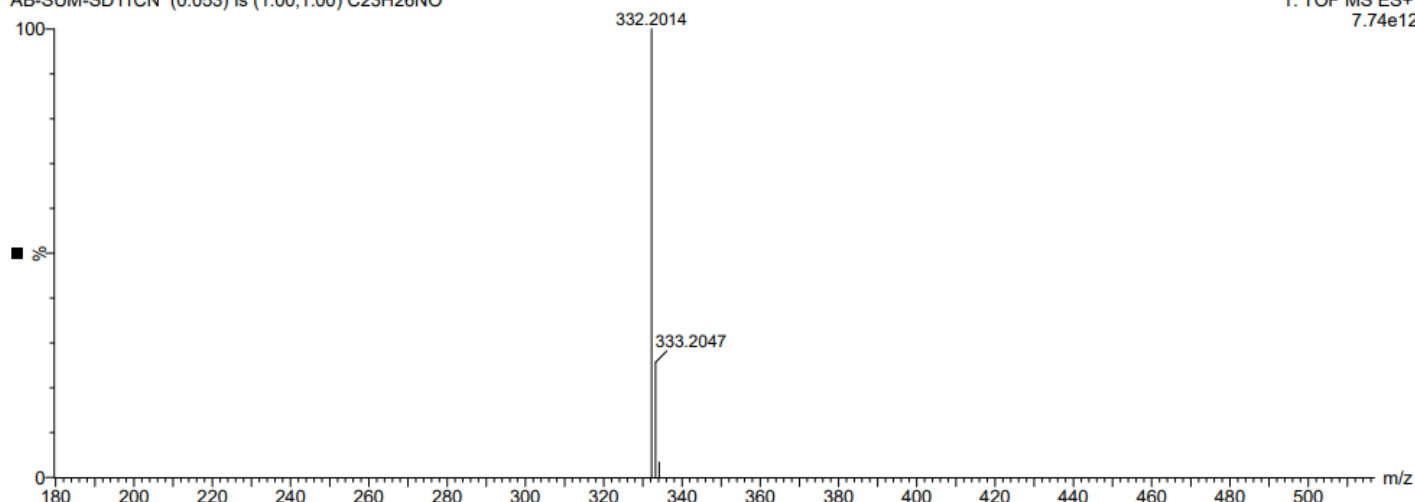

AB-SUM-SD11CN 6 (0.138) AM2 (Ar,22000.0,556.28,0.00,LS 10); ABS

1: TOF MS ES+  
9.14e6

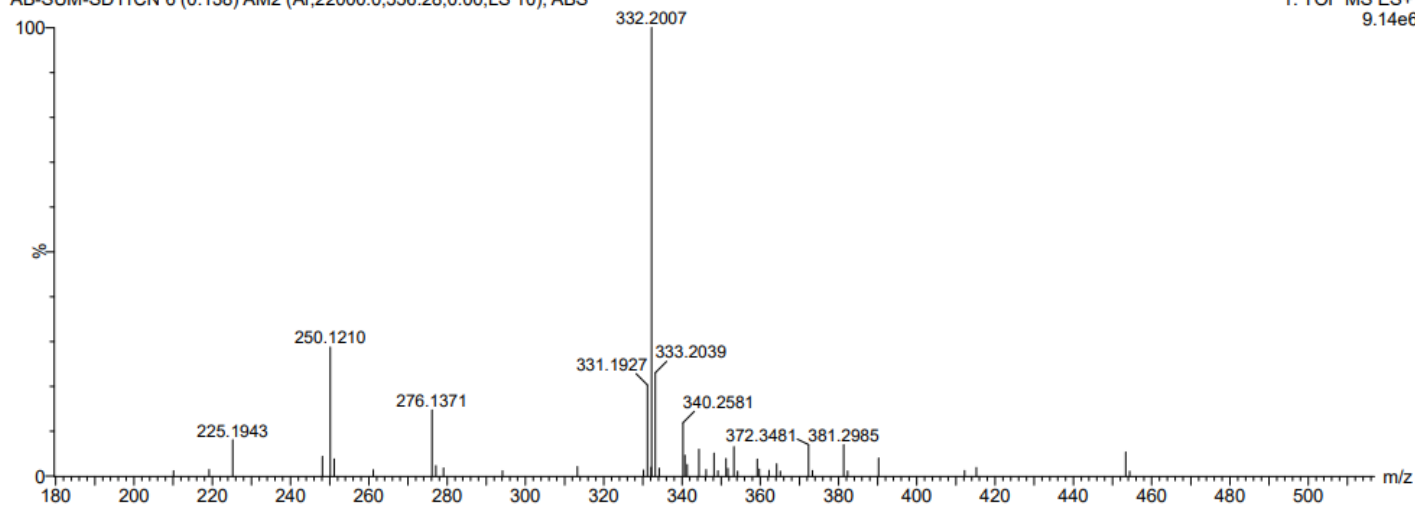

HRMS data of 3

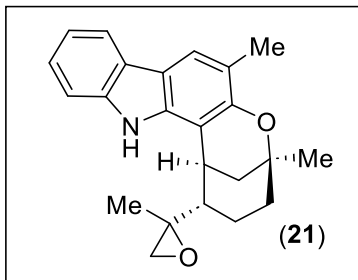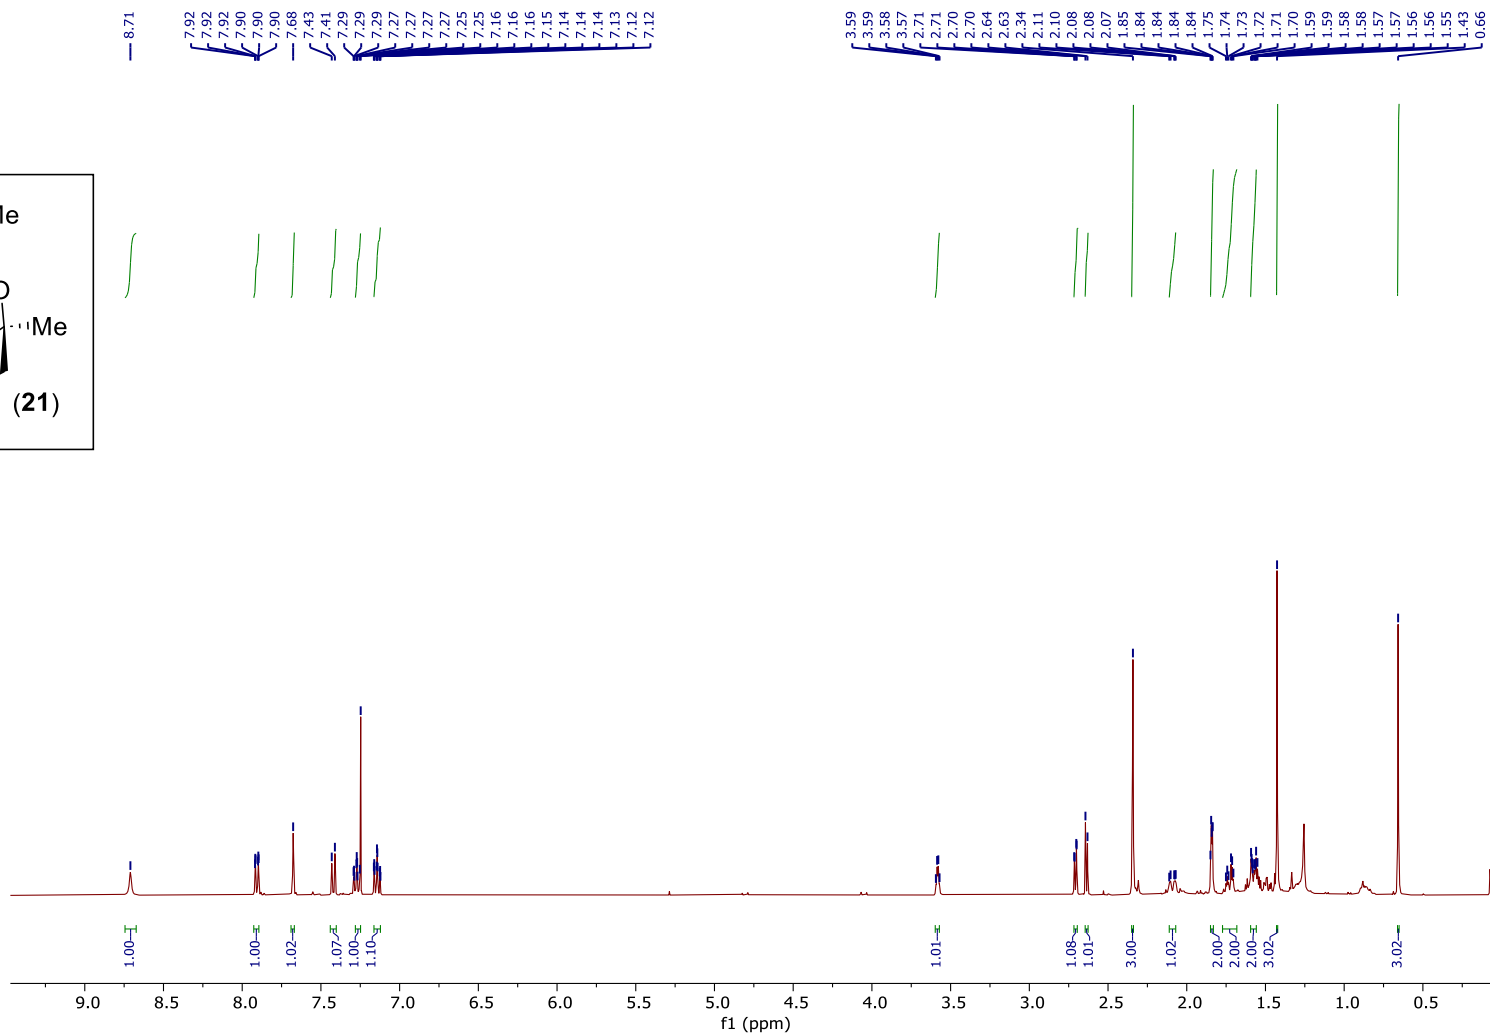

$^1\text{H}$  NMR (500 MHz,  $\text{CDCl}_3$ ) of **21**

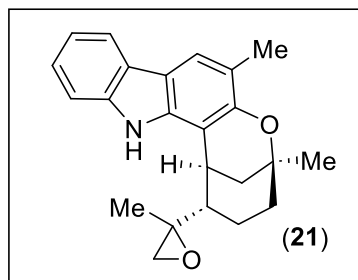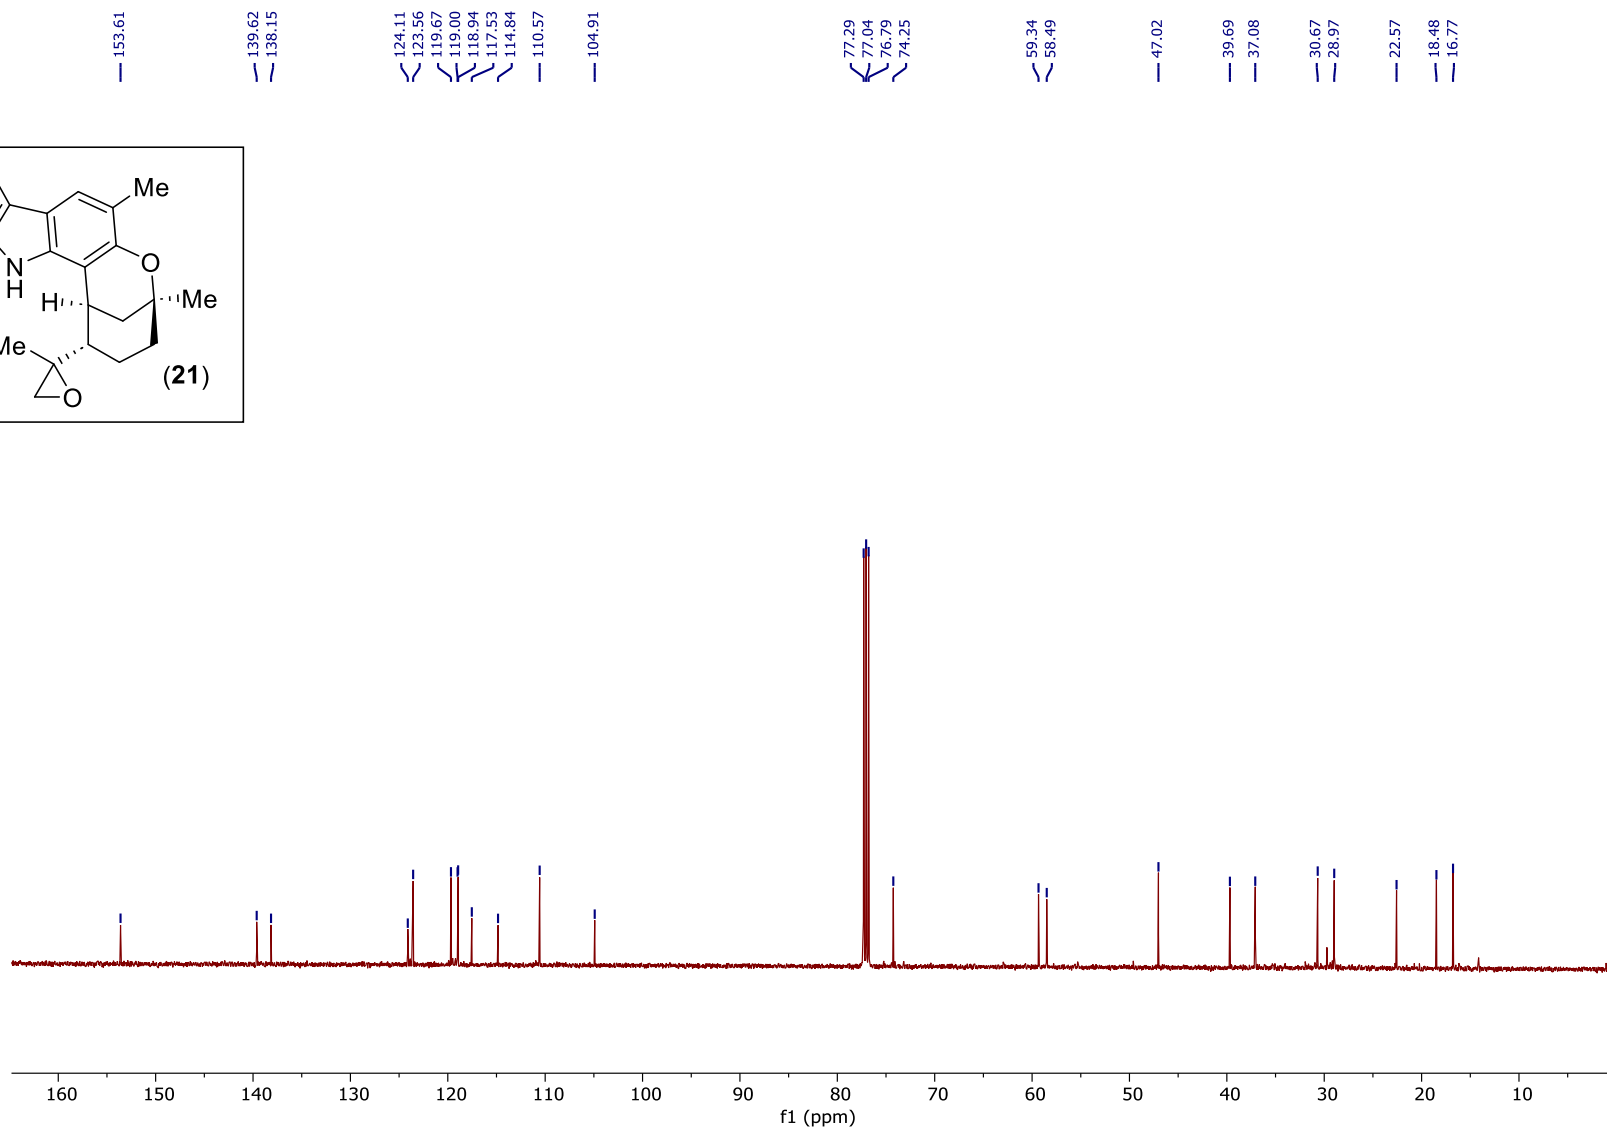

$^{13}\text{C}$  NMR (125 MHz,  $\text{CDCl}_3$ ) of **21**

AB16-Apr-2024 12:28:10

IISER - KOLKATA

1: TOF MS ES+  
7.72e12

AB-SUM-SD EPM (0.104) Is (1.00,1.00) C<sub>23</sub>H<sub>26</sub>NO<sub>2</sub>

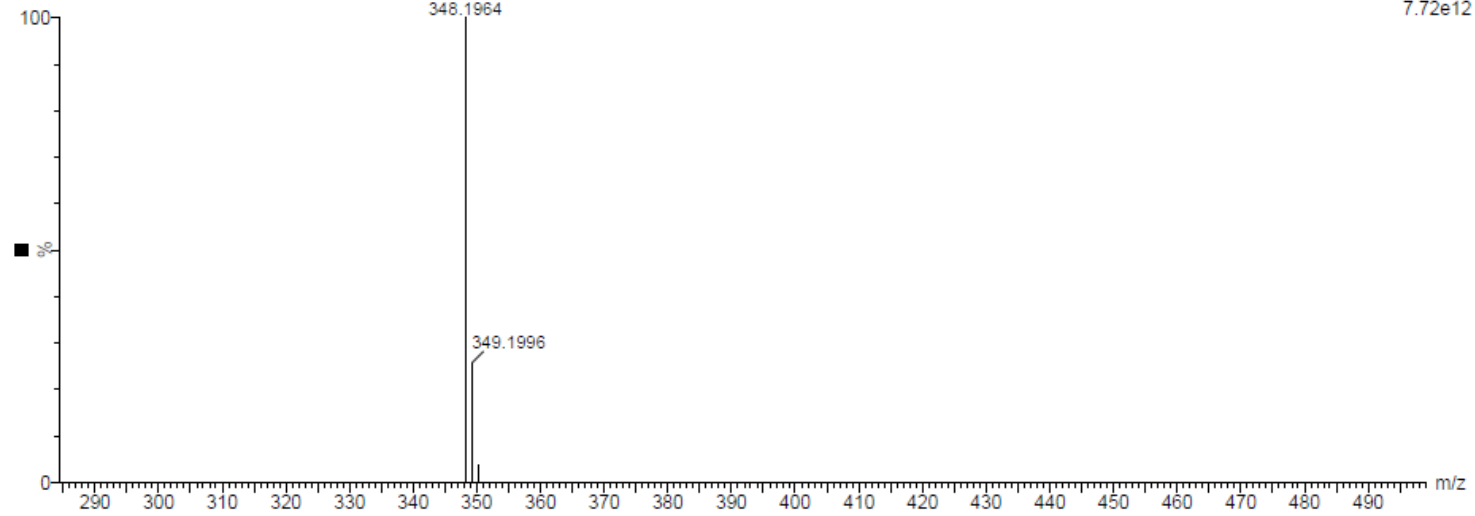

AB-SUM-SD EPM 4 (0.104)

1: TOF MS ES+  
4.53e6

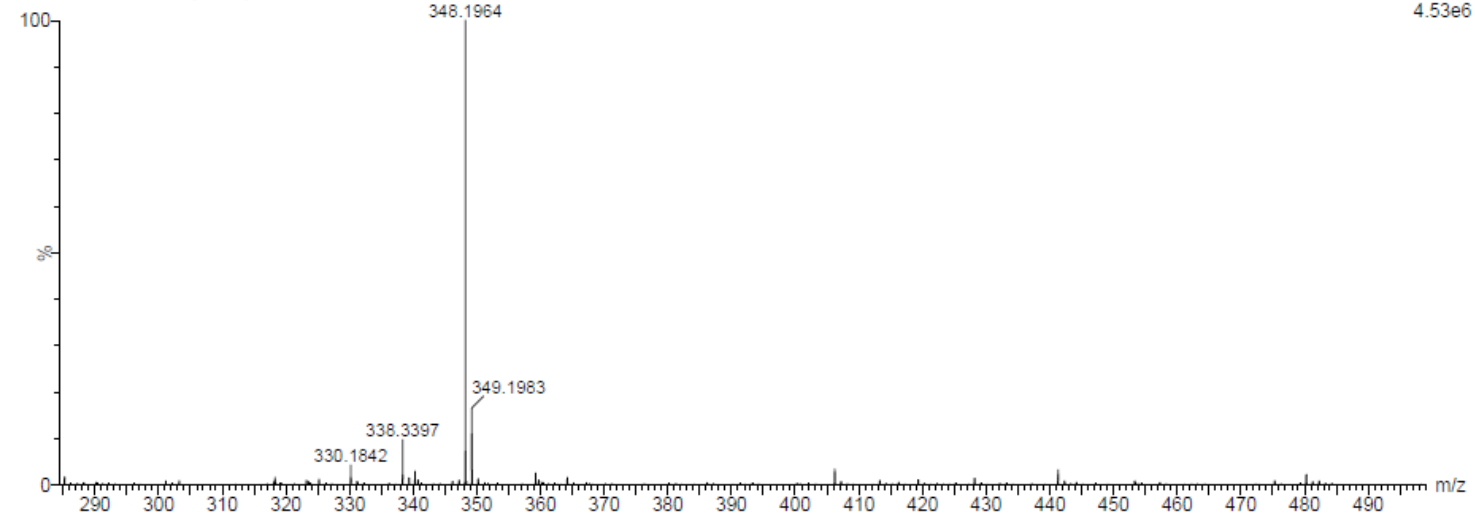

HRMS data of 21

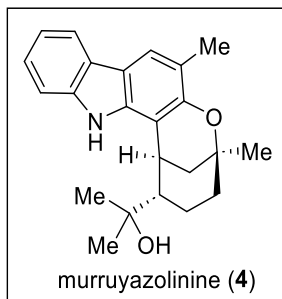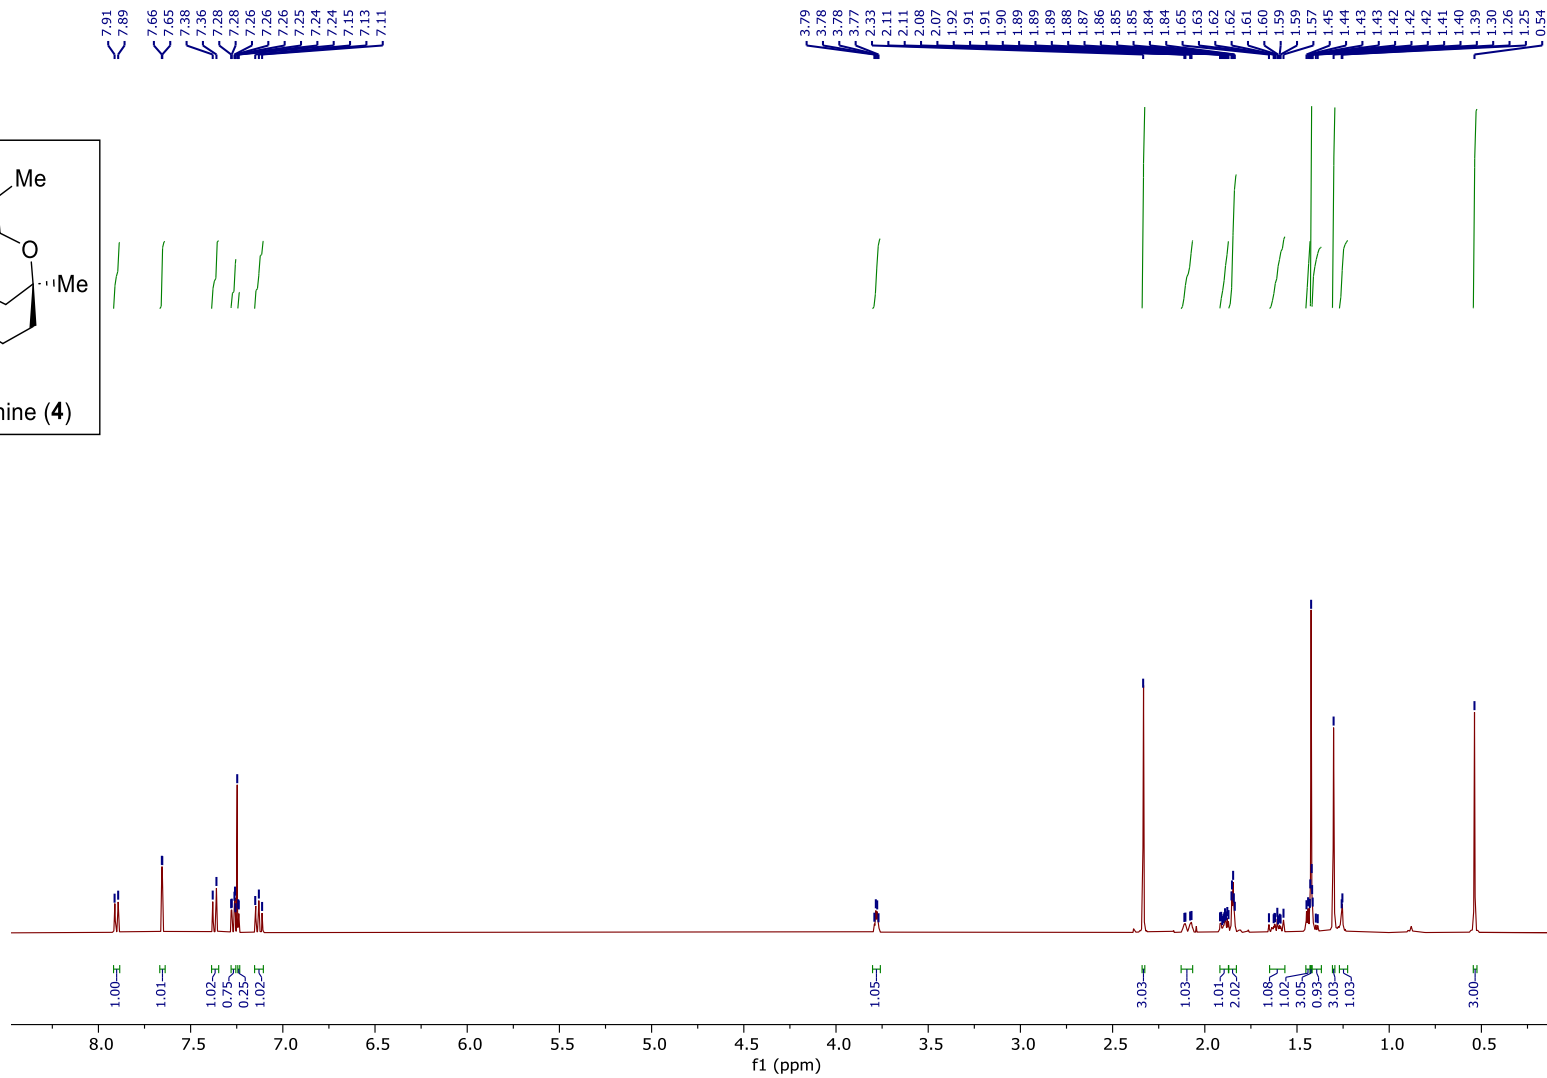

<sup>1</sup>H NMR (400 MHz, CDCl<sub>3</sub>) of 4

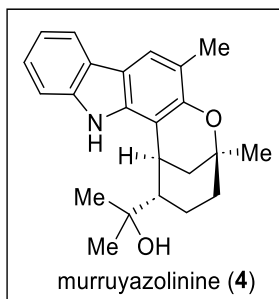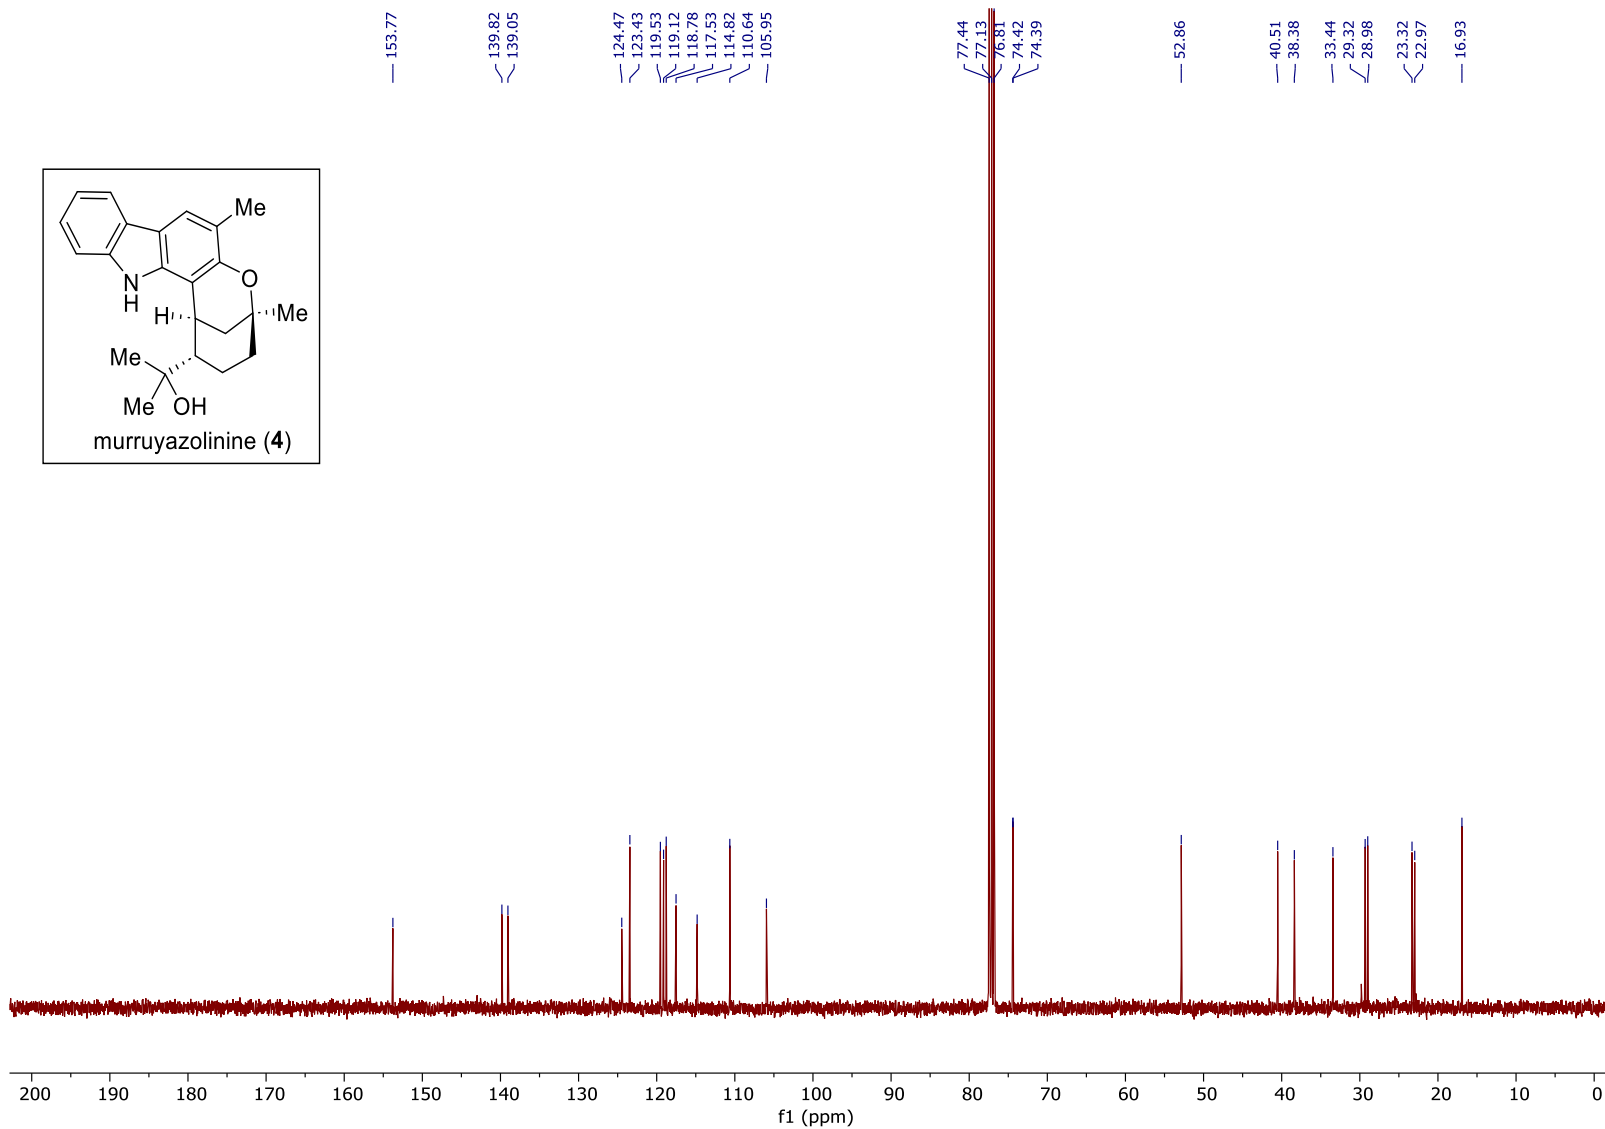

$^{13}\text{C}$  NMR (100 MHz,  $\text{CDCl}_3$ ) of 4



AB10-Apr-2024 14:57:34

IISER - KOLKATA

1: TOF MS ES+  
7.72e12

AB-SUM-SD57M1 (0.053) Is (1.00,1.00) C<sub>23</sub>H<sub>28</sub>NO<sub>2</sub>

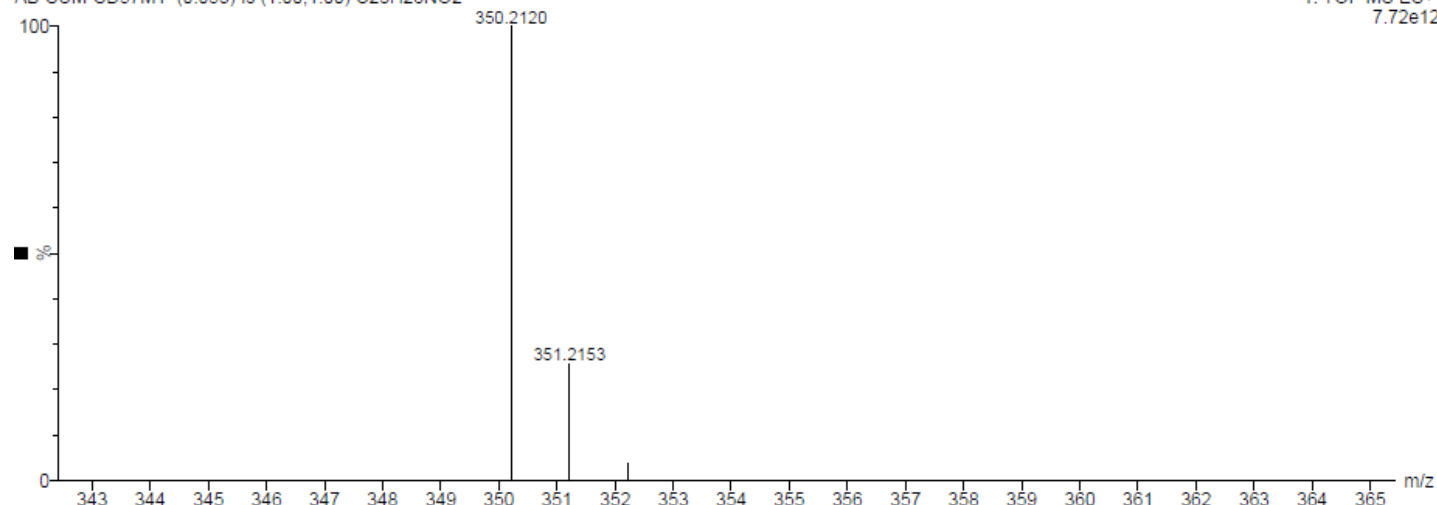

AB-SUM-SD57M1 2 (0.070) AM2 (Ar,22000.0,556.28,0.00,LS 10); ABS

1: TOF MS ES+  
1.09e7

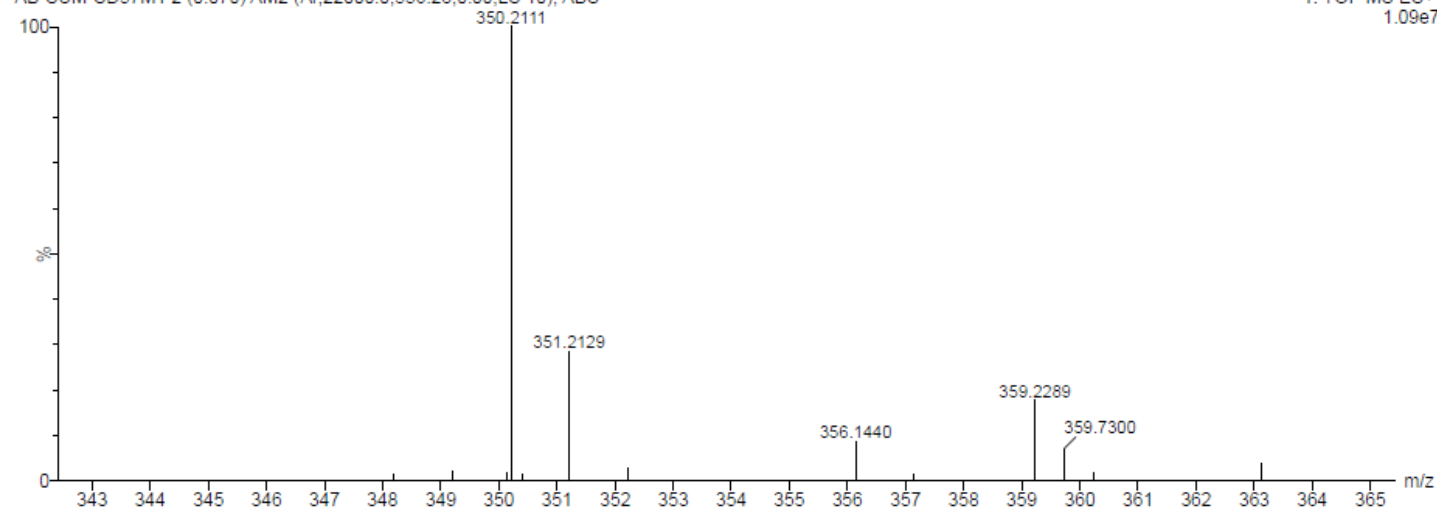

HRMS data of 4

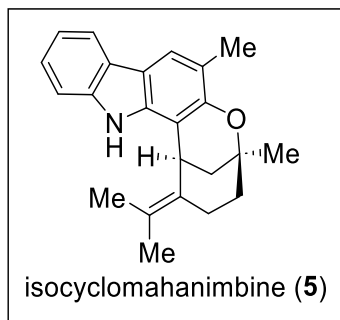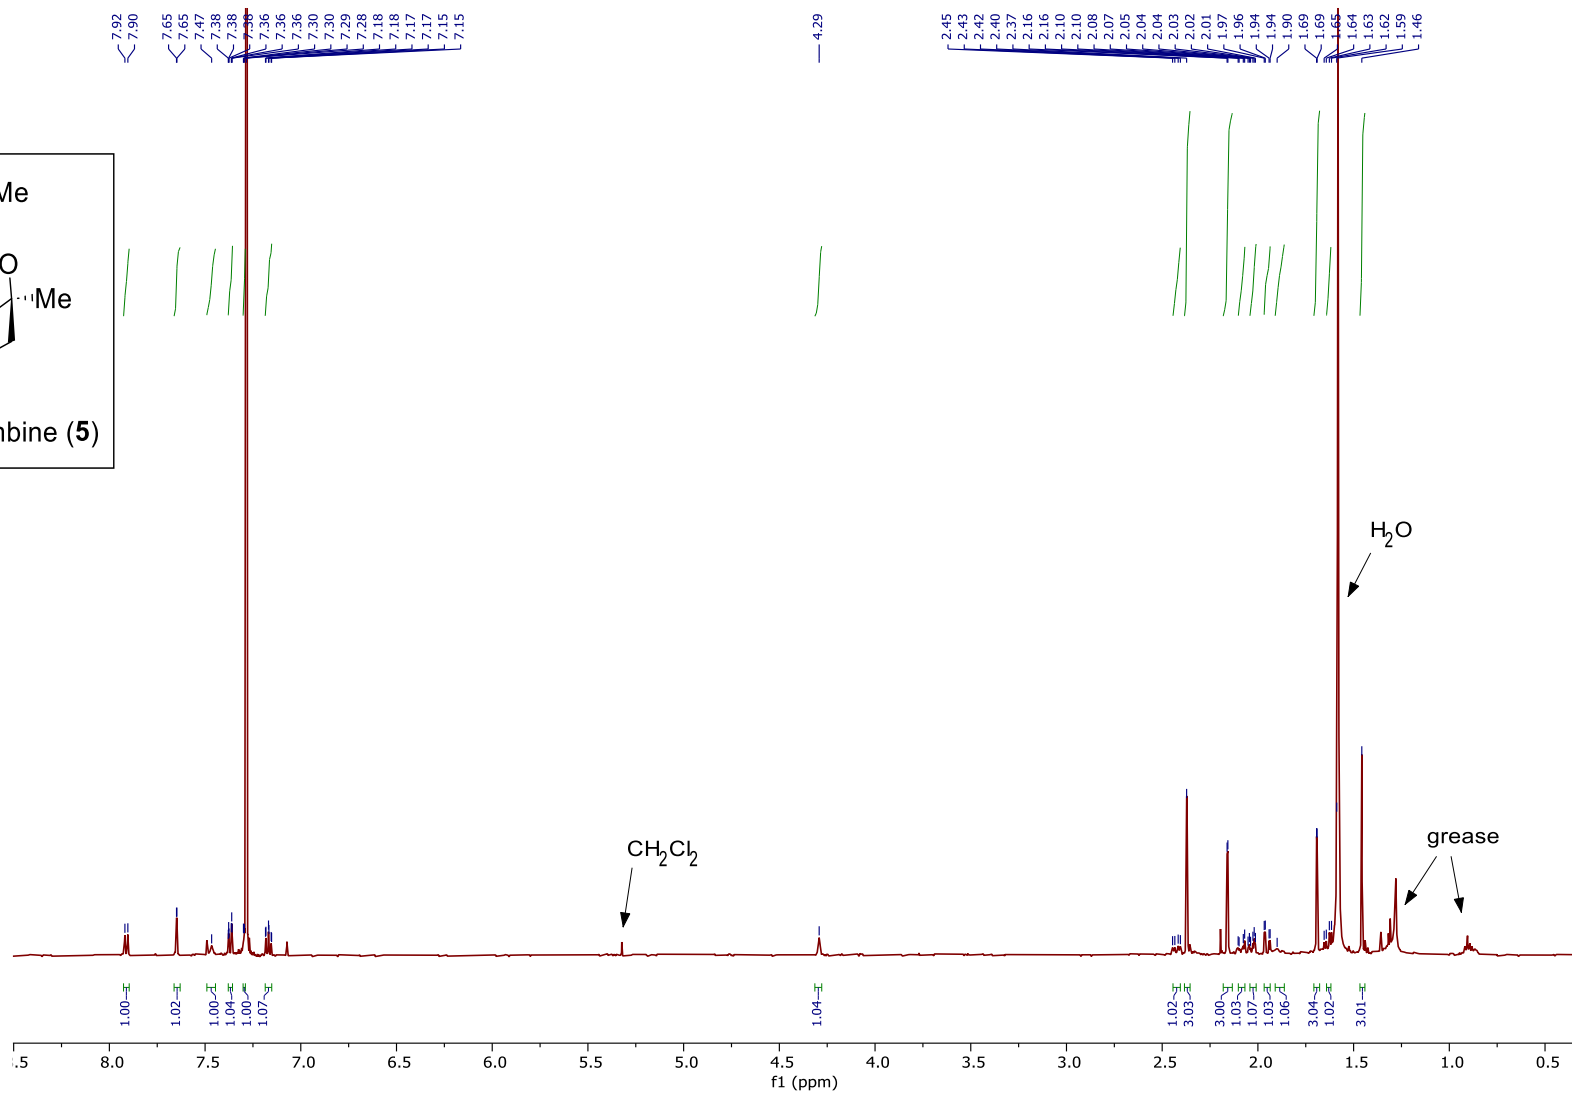

<sup>1</sup>H NMR (500 MHz, CDCl<sub>3</sub>) of 5

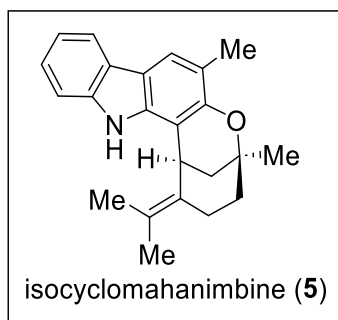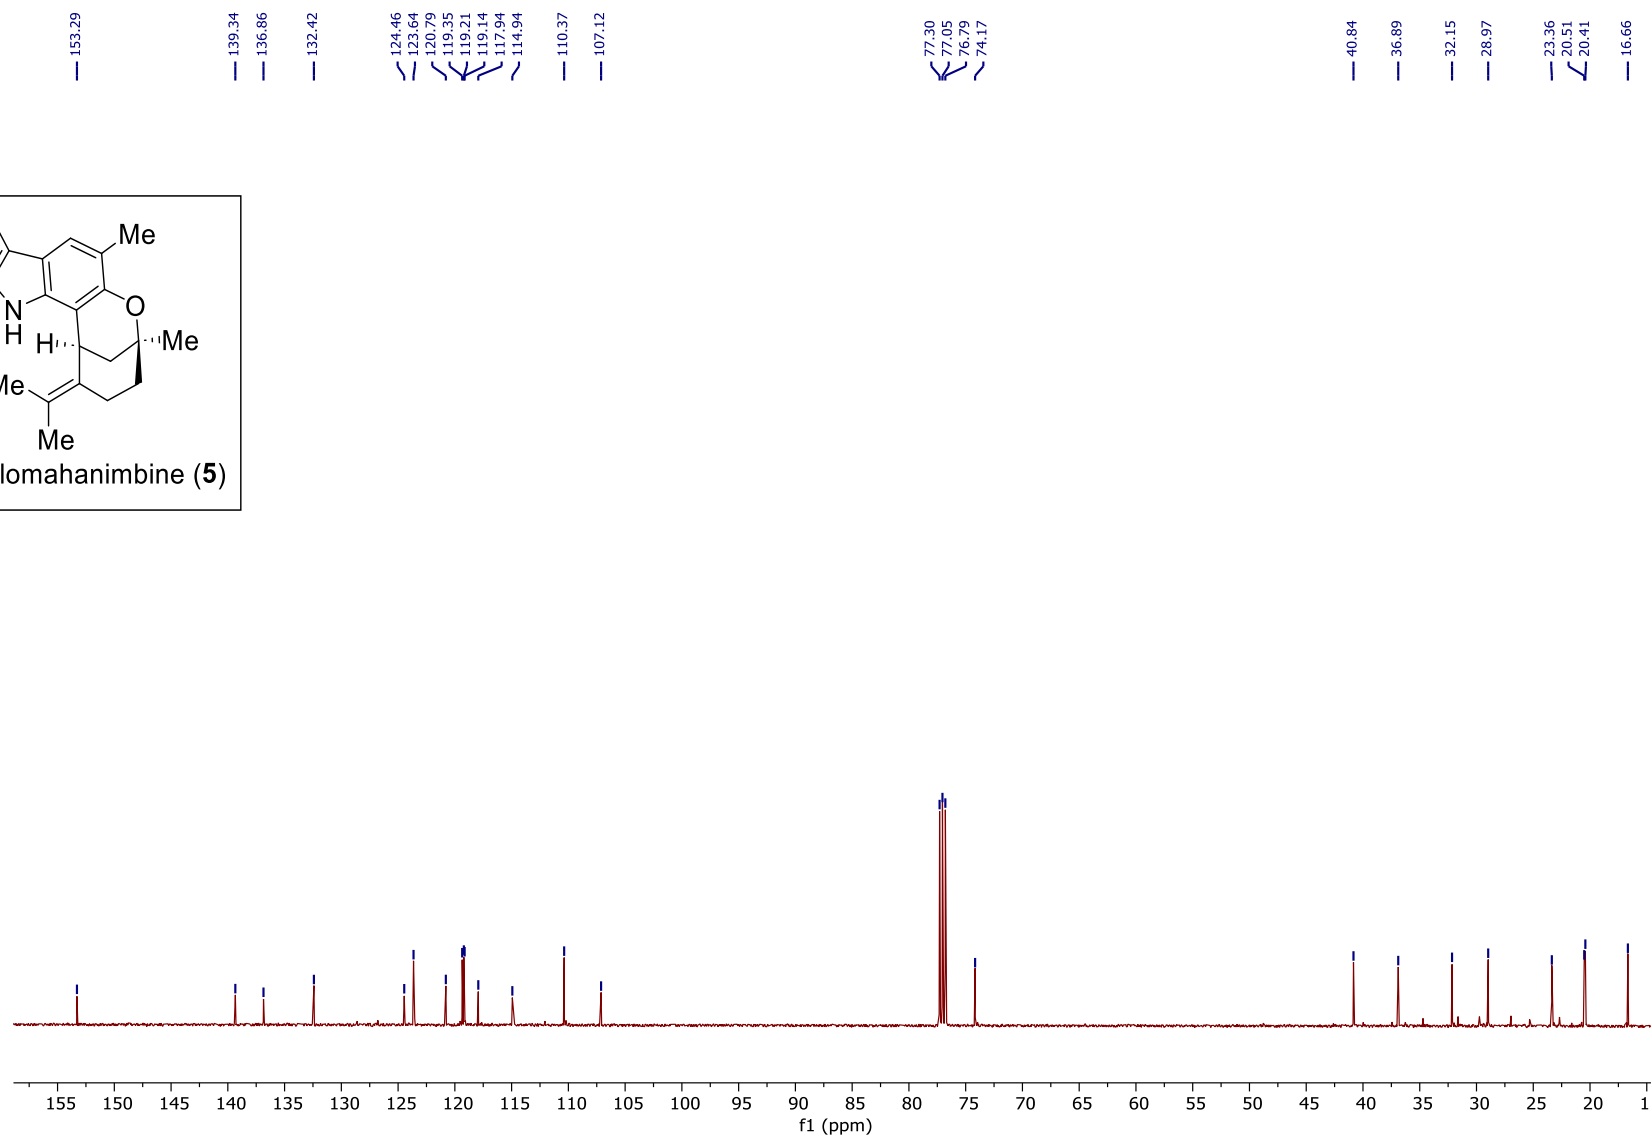

$^{13}\text{C}$  NMR (100 MHz,  $\text{CDCl}_3$ ) of **5**

AB25-Apr-2024 13:17:27  
AB-SUM-SD58ISO (0.053) Is (1.00,1.00) C23H26NO

IISER - KOLKATA

1: TOF MS ES+  
7.74e12

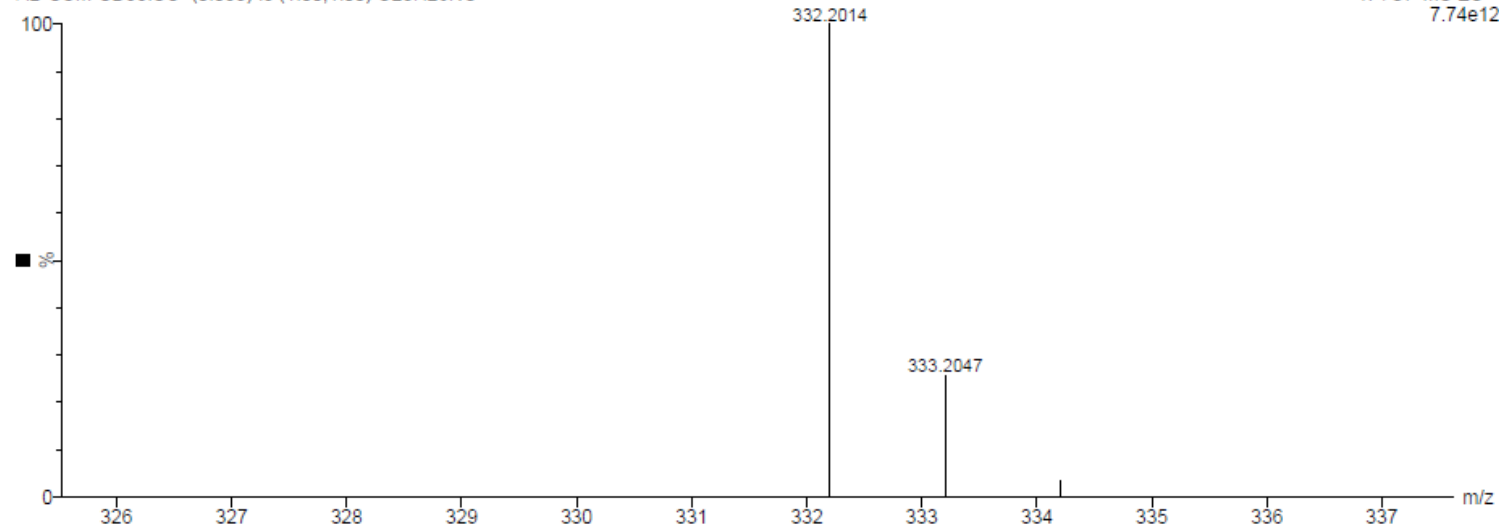

AB-SUM-SD58ISO 3 (0.087) AM2 (Ar,22000,0,556.28,0,00,LS 10); ABS

1: TOF MS ES+  
3.54e6

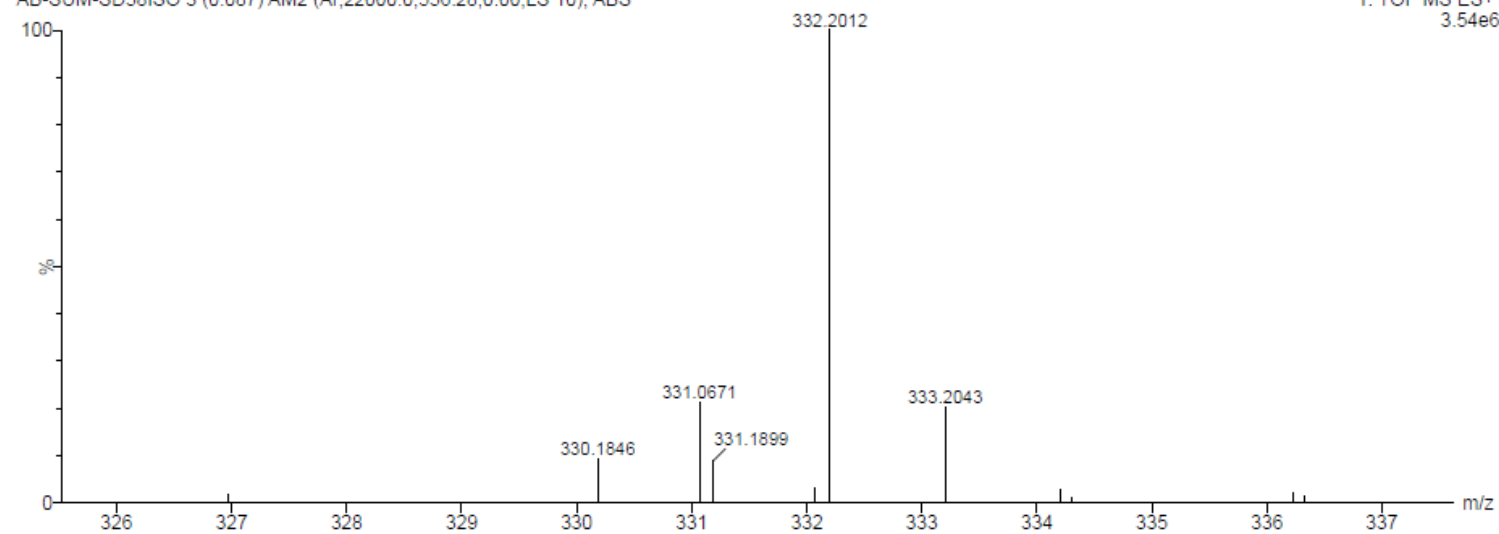

HRMS data of 5
